# Supplementary material
Source: PubMed Central journal article supplement (PMC3388818)
Supplement: supp_ers075_00074211-file001.pdf [file supp_ers075_00074211-file001.pdf]

Transcriptional analysis of the Arabidopsis ovule by Massively Parallel Signature Sequencing.

Nidia Sánchez-León\*<sup>1</sup>, Mario Arteaga-Vázquez\*<sup>1,4</sup>, César Alvarez-Mejía<sup>1</sup>, Javier Mendiola-Soto<sup>1</sup>, Noé Durán-Figueroa<sup>1</sup>, Daniel Rodríguez-Leal<sup>1</sup>, Isaac Rodríguez-Arévalo<sup>1</sup>, Vicenta García-Campayo<sup>1</sup>, Marcelina García-Aguilar<sup>1,5</sup>, Vianey Olmedo-Monfil<sup>1,6</sup>, Mario Arteaga-Sánchez<sup>3</sup>, Octavio Martínez de la Vega<sup>1</sup>, Kan Nobuta<sup>2</sup>, Kalyan Vemaraju<sup>2</sup>, Blake C. Meyers<sup>2</sup>, and Jean-Philippe Vielle-Calzada<sup>1§</sup>

Supplementary Table 1

Supplementary table 1 . Transcriptional activity of wild type ovules signatures from unannotated regions.

<sup>a</sup>MPSS signatures.

<sup>b</sup>Activity in transcripts per Million. AGM. *agamous* inflorescence. AP1. *apetala1-10* inflorescence. AP3. *apetala3-6* inflorescence. CAS. Callus. GSE. Germinating seedlings. INS. Inflorescences. LES. Leaves. ROS. Roots. S04. Leaves, 4 hr after salicylic acid treatment. S52. Leaves, 52 hr after salicylic acid treatment. SAP. *superman/apetala* inflorescence. SIS. Siliques. OVL. Wild type ovules. SPL. *sporocyteless* ovule

| SIGNATURE <sup>a</sup> | Transcriptional activity <sup>b</sup> |     |     |     |     |     |     |     |     |     |     |     |     |     |
|------------------------|---------------------------------------|-----|-----|-----|-----|-----|-----|-----|-----|-----|-----|-----|-----|-----|
|                        | AGM                                   | AP1 | AP3 | CAS | GSE | INS | LES | ROS | S04 | S52 | SAP | SIS | OVL | SPL |
| GATCCAACGGTTTTGT       | 3                                     | 2   | 4   | 0   | 0   | 0   | 0   | 0   | 0   | 0   | 3   | 0   | 19  | 0   |
| GATCTGTCTTCTTAGTT      | 8                                     | 2   | 15  | 3   | 0   | 2   | 1   | 5   | 0   | 5   | 0   | 0   | 1   | 0   |
| GATCTCAAACGAGTAAC      | 11                                    | 0   | 5   | 0   | 0   | 1   | 0   | 0   | 0   | 4   | 0   | 0   | 30  | 0   |
| GATCTGCAAGACGAAAA      | 208                                   | 135 | 103 | 42  | 19  | 263 | 221 | 951 | 163 | 267 | 83  | 34  | 183 | 120 |
| GATCATTTGTTGCAATA      | 5                                     | 5   | 6   | 11  | 0   | 0   | 0   | 5   | 5   | 0   | 0   | 35  | 9   | 0   |
| GATCTGCTTTTGTGCGCA     | 12                                    | 0   | 1   | 0   | 5   | 0   | 5   | 2   | 0   | 1   | 0   | 0   | 9   | 7   |
| GATCCAAACCTAATACC      | 13                                    | 5   | 1   | 50  | 0   | 5   | 30  | 0   | 0   | 3   | 3   | 29  | 30  | 16  |
| GATCCAATCTTTGTTGC      | 8                                     | 0   | 13  | 12  | 0   | 0   | 8   | 0   | 0   | 0   | 0   | 54  | 12  | 0   |
| GATCTGTTGTTGGACCT      | 18                                    | 46  | 61  | 0   | 13  | 12  | 32  | 21  | 51  | 23  | 26  | 23  | 95  | 10  |
| GATCTTCAACAAGGTGA      | 6                                     | 1   | 8   | 7   | 0   | 2   | 11  | 0   | 0   | 4   | 1   | 1   | 1   | 0   |
| GATCTTCAACATTTGAC      | 9                                     | 0   | 4   | 12  | 2   | 0   | 0   | 1   | 0   | 0   | 0   | 0   | 25  | 0   |
| GATCTCCCTTTTCTTG       | 20                                    | 1   | 19  | 17  | 0   | 0   | 0   | 7   | 0   | 0   | 0   | 35  | 3   | 26  |
| GATCTTCGTGAACCTTG      | 7                                     | 2   | 4   | 0   | 0   | 0   | 0   | 0   | 0   | 0   | 0   | 2   | 1   | 0   |



Supplementary Table 1

| SIGNATURE <sup>a</sup> | Transcriptional activity <sup>b</sup> |     |     |     |     |     |     |     |     |     |     |     |     |     |
|------------------------|---------------------------------------|-----|-----|-----|-----|-----|-----|-----|-----|-----|-----|-----|-----|-----|
|                        | AGM                                   | AP1 | AP3 | CAS | GSE | INS | LES | ROS | S04 | S52 | SAP | SIS | OVL | SPL |
| GATCACTTAGCAGGAGA      | 3                                     | 1   | 0   | 0   | 0   | 4   | 0   | 0   | 0   | 0   | 0   | 0   | 3   | 0   |
| GATCCTAACCGTTGTCC      | 60                                    | 35  | 26  | 138 | 0   | 82  | 42  | 80  | 17  | 40  | 48  | 81  | 60  | 65  |
| GATCCTAAGCTCATGAA      | 9                                     | 8   | 24  | 29  | 0   | 12  | 3   | 6   | 0   | 1   | 35  | 4   | 19  | 3   |
| GATCAGAGTTTCTTCAT      | 2                                     | 0   | 2   | 0   | 0   | 0   | 0   | 3   | 0   | 0   | 0   | 6   | 2   | 0   |
| GATCCTACATTCTCTTT      | 27                                    | 8   | 4   | 3   | 5   | 3   | 4   | 0   | 110 | 7   | 12  | 5   | 5   | 0   |
| GATCCTCAAGTGTGATG      | 13                                    | 2   | 8   | 3   | 7   | 0   | 0   | 16  | 0   | 9   | 23  | 0   | 32  | 0   |
| GATCCTCTCAGCTATTC      | 20                                    | 29  | 5   | 0   | 0   | 10  | 6   | 0   | 0   | 5   | 46  | 96  | 317 | 39  |
| GATCAACGATTCCATCC      | 9                                     | 0   | 6   | 0   | 0   | 0   | 19  | 0   | 0   | 0   | 4   | 15  | 5   | 3   |
| GATCCTGAAGATTAAGT      | 10                                    | 7   | 8   | 61  | 0   | 11  | 2   | 43  | 0   | 0   | 0   | 12  | 1   | 2   |
| GATCCTGCGGACCAATG      | 4                                     | 0   | 0   | 0   | 0   | 0   | 0   | 0   | 0   | 0   | 0   | 0   | 1   | 0   |
| GATCCTGTCAACGAACC      | 14                                    | 10  | 5   | 15  | 0   | 13  | 24  | 24  | 0   | 5   | 0   | 5   | 57  | 21  |
| GATCCTTCCCTTGGAAT      | 8                                     | 7   | 2   | 0   | 0   | 4   | 0   | 0   | 0   | 2   | 37  | 0   | 43  | 16  |
| GATCAAGTTTCAGAGTC      | 2                                     | 2   | 0   | 0   | 18  | 2   | 0   | 0   | 0   | 0   | 12  | 0   | 38  | 23  |
| GATCAATAAAGTGTGCC      | 33                                    | 2   | 10  | 92  | 0   | 4   | 66  | 23  | 7   | 4   | 0   | 89  | 27  | 65  |
| GATCCTTGTTTCCCTTT      | 23                                    | 57  | 77  | 25  | 2   | 66  | 9   | 60  | 42  | 7   | 22  | 22  | 35  | 18  |
| GATCCTTCTTGCGAA        | 11                                    | 2   | 10  | 0   | 0   | 3   | 3   | 0   | 0   | 0   | 6   | 0   | 51  | 57  |
| GATCAATGCCAAGTCTC      | 23                                    | 7   | 24  | 63  | 0   | 9   | 1   | 34  | 4   | 1   | 2   | 65  | 94  | 87  |
| GATCACAACCAACGAAA      | 3                                     | 4   | 0   | 0   | 0   | 0   | 0   | 0   | 5   | 1   | 0   | 0   | 1   | 1   |

Supplementary Table 1

| SIGNATURE <sup>a</sup> | Transcriptional activity <sup>b</sup> |     |     |     |      |     |     |     |      |      |     |     |     |     |
|------------------------|---------------------------------------|-----|-----|-----|------|-----|-----|-----|------|------|-----|-----|-----|-----|
|                        | AGM                                   | AP1 | AP3 | CAS | GSE  | INS | LES | ROS | S04  | S52  | SAP | SIS | OVL | SPL |
| GATCACAGTCACTTGCT      | 16                                    | 17  | 23  | 0   | 53   | 13  | 62  | 0   | 12   | 37   | 16  | 43  | 21  | 6   |
| GATCCTTTTGACAGGAC      | 11                                    | 4   | 15  | 29  | 0    | 3   | 0   | 4   | 0    | 0    | 7   | 6   | 12  | 16  |
| GATCGAAGGTGTATGTG      | 842                                   | 181 | 127 | 32  | 1496 | 57  | 335 | 27  | 5933 | 3376 | 865 | 585 | 11  | 0   |
| GATCGACGGTGGTTAGT      | 171                                   | 59  | 44  | 287 | 9    | 22  | 36  | 24  | 25   | 16   | 109 | 56  | 121 | 116 |
| GATCACAAAATCAGGA       | 9                                     | 4   | 27  | 0   | 2    | 17  | 12  | 18  | 12   | 3    | 0   | 3   | 69  | 5   |
| GATCACCATCTTGTCG       | 7                                     | 16  | 1   | 0   | 7    | 13  | 1   | 29  | 0    | 0    | 2   | 1   | 23  | 6   |
| GATCGAGGTCTCTCTTT      | 13                                    | 4   | 10  | 9   | 9    | 10  | 1   | 26  | 4    | 18   | 0   | 0   | 24  | 17  |
| GATCGCAAGACTCGTGC      | 43                                    | 58  | 44  | 95  | 43   | 36  | 29  | 186 | 3    | 15   | 28  | 51  | 131 | 160 |
| GATCGCAAGAGGATAAT      | 3                                     | 0   | 0   | 1   | 0    | 1   | 0   | 2   | 0    | 0    | 7   | 0   | 10  | 0   |
| GATCACTCTTCAACCAA      | 3                                     | 1   | 4   | 52  | 0    | 0   | 8   | 17  | 0    | 2    | 0   | 15  | 41  | 15  |
| GATCGGTTTCGTGGCTG      | 7                                     | 0   | 0   | 0   | 0    | 0   | 0   | 0   | 0    | 0    | 0   | 0   | 1   | 1   |
| GATCGGAACTCATCCTT      | 8                                     | 24  | 4   | 0   | 0    | 1   | 0   | 15  | 12   | 0    | 1   | 0   | 3   | 0   |
| GATCGGAAGCGTCGATG      | 12                                    | 12  | 36  | 63  | 3    | 22  | 21  | 64  | 19   | 0    | 6   | 46  | 22  | 145 |
| GATCGGAAGTTTGCTCA      | 41                                    | 95  | 31  | 29  | 0    | 27  | 10  | 27  | 21   | 17   | 30  | 15  | 45  | 73  |
| GATCAGCACACGTGGTA      | 5                                     | 1   | 2   | 0   | 0    | 0   | 2   | 0   | 8    | 0    | 0   | 0   | 2   | 0   |
| GATCTGAAAATCTTTGC      | 4                                     | 0   | 0   | 0   | 0    | 2   | 0   | 0   | 0    | 0    | 0   | 0   | 2   | 0   |
| GATCGTCGACTCCTTGT      | 472                                   | 280 | 318 | 119 | 31   | 277 | 235 | 321 | 157  | 227  | 106 | 137 | 414 | 220 |
| GATCATAATGAGAGACA      | 6                                     | 0   | 10  | 0   | 0    | 3   | 10  | 0   | 0    | 0    | 1   | 0   | 14  | 0   |

Supplementary Table 1

| SIGNATURE <sup>a</sup> | Transcriptional activity <sup>b</sup> |     |     |     |     |     |     |     |     |     |     |     |     |     |
|------------------------|---------------------------------------|-----|-----|-----|-----|-----|-----|-----|-----|-----|-----|-----|-----|-----|
|                        | AGM                                   | AP1 | AP3 | CAS | GSE | INS | LES | ROS | S04 | S52 | SAP | SIS | OVL | SPL |
| GATCATCGACAGCCTCC      | 11                                    | 23  | 13  | 10  | 3   | 24  | 0   | 34  | 0   | 0   | 16  | 46  | 67  | 80  |
| GATCATCGGAGGTACTG      | 1                                     | 2   | 10  | 0   | 0   | 0   | 0   | 11  | 0   | 9   | 0   | 0   | 16  | 16  |
| GATCTACGGAGCCATTT      | 47                                    | 11  | 32  | 124 | 108 | 2   | 1   | 48  | 42  | 3   | 18  | 18  | 139 | 213 |
| GATCTCTTTTTTTGGTC      | 3                                     | 0   | 0   | 0   | 0   | 0   | 0   | 17  | 0   | 0   | 0   | 0   | 1   | 0   |
| GATCTGAAGAAACCAAC      | 22                                    | 37  | 52  | 16  | 33  | 30  | 8   | 34  | 12  | 10  | 74  | 30  | 17  | 14  |
| GATCATGCCTAATCTGC      | 22                                    | 13  | 19  | 81  | 1   | 17  | 8   | 59  | 18  | 2   | 4   | 134 | 177 | 119 |
| GATCTGATGCTTGTTGG      | 7                                     | 2   | 5   | 0   | 2   | 3   | 3   | 31  | 10  | 0   | 36  | 7   | 1   | 48  |
| GATCTTACTTTTTTCCT      | 2                                     | 0   | 9   | 0   | 0   | 2   | 2   | 0   | 0   | 0   | 15  | 74  | 5   | 0   |
| GATCTTATGTTAGTTC       | 3                                     | 0   | 5   | 0   | 0   | 2   | 0   | 0   | 0   | 0   | 2   | 0   | 1   | 0   |
| GATCAAACATGGGTTTC      | 10                                    | 10  | 15  | 29  | 5   | 6   | 35  | 64  | 12  | 18  | 29  | 6   | 88  | 21  |
| GATCTTGCTTCTTTTG       | 12                                    | 0   | 1   | 0   | 0   | 8   | 17  | 0   | 0   | 0   | 0   | 0   | 6   | 0   |
| GATCTTGTGGCTAAAAA      | 5                                     | 12  | 0   | 0   | 0   | 2   | 11  | 0   | 0   | 0   | 0   | 0   | 6   | 0   |
| GATCTTACTGGTGAAA       | 22                                    | 7   | 15  | 0   | 0   | 16  | 0   | 0   | 0   | 0   | 8   | 0   | 1   | 1   |
| GATCACCTCTGATTGAG      | 3                                     | 6   | 12  | 18  | 0   | 5   | 22  | 14  | 0   | 3   | 1   | 0   | 6   | 10  |
| GATCCATCATCCATGTT      | 1                                     | 0   | 0   | 0   | 0   | 2   | 0   | 10  | 0   | 0   | 0   | 0   | 12  | 0   |
| GATCTTCATCGGTCACT      | 9                                     | 2   | 2   | 0   | 2   | 0   | 3   | 10  | 1   | 0   | 0   | 0   | 1   | 14  |
| GATCTCCGCCATCGCT       | 6                                     | 12  | 10  | 20  | 0   | 3   | 0   | 0   | 3   | 0   | 13  | 9   | 66  | 3   |







Supplementary Table 1

| SIGNATURE <sup>a</sup> | Transcriptional activity <sup>b</sup> |     |     |     |     |     |     |     |     |     |     |     |     |     |
|------------------------|---------------------------------------|-----|-----|-----|-----|-----|-----|-----|-----|-----|-----|-----|-----|-----|
|                        | AGM                                   | AP1 | AP3 | CAS | GSE | INS | LES | ROS | S04 | S52 | SAP | SIS | OVL | SPL |
| GATCCGTAGTGGGTTGC      | 1                                     | 4   | 3   | 2   | 5   | 6   | 0   | 0   | 0   | 0   | 2   | 4   | 1   | 0   |
| GATCCAGCTTGAGGGGG      | 1                                     | 0   | 0   | 0   | 0   | 0   | 0   | 0   | 0   | 0   | 0   | 0   | 40  | 0   |
| GATCGGAGTCGAAATCA      | 1                                     | 3   | 2   | 0   | 2   | 0   | 3   | 0   | 0   | 0   | 16  | 0   | 5   | 10  |
| GATCTGCAAATCGGTAG      | 3                                     | 4   | 15  | 39  | 3   | 9   | 0   | 0   | 0   | 0   | 0   | 0   | 63  | 50  |
| GATCTGCGACTGAAATA      | 8                                     | 1   | 3   | 0   | 0   | 3   | 2   | 0   | 0   | 4   | 0   | 0   | 8   | 0   |
| GATCCAAAGCAGAAGAT      | 0                                     | 2   | 6   | 7   | 0   | 0   | 3   | 0   | 0   | 12  | 0   | 0   | 12  | 17  |
| GATCTGAGCCAAAACCG      | 0                                     | 19  | 1   | 0   | 0   | 8   | 0   | 0   | 0   | 0   | 11  | 24  | 8   | 25  |
| GATCCACAACCGTGGTT      | 0                                     | 3   | 0   | 0   | 0   | 0   | 0   | 0   | 0   | 0   | 0   | 0   | 8   | 0   |
| GATCCGTTCAATCAACA      | 0                                     | 2   | 0   | 0   | 0   | 5   | 0   | 3   | 0   | 0   | 0   | 0   | 1   | 0   |
| GATCCCTCGCAAAAAT       | 0                                     | 5   | 1   | 0   | 0   | 0   | 0   | 0   | 0   | 0   | 0   | 0   | 3   | 0   |
| GATCCCTCTCCTGAATT      | 0                                     | 2   | 2   | 1   | 3   | 0   | 0   | 4   | 0   | 0   | 0   | 0   | 47  | 1   |
| GATCCGACTCCTACGAA      | 0                                     | 2   | 0   | 0   | 0   | 20  | 0   | 0   | 0   | 0   | 16  | 0   | 1   | 0   |
| GATCCGGCATTAGTCGT      | 0                                     | 1   | 19  | 50  | 0   | 0   | 0   | 0   | 0   | 0   | 0   | 0   | 11  | 15  |
| GATCTGTCTTAGTCCCC      | 0                                     | 15  | 8   | 7   | 1   | 14  | 0   | 5   | 0   | 38  | 7   | 4   | 56  | 103 |
| GATCAGCCTTAGTCACG      | 0                                     | 3   | 0   | 0   | 0   | 0   | 0   | 0   | 0   | 0   | 0   | 0   | 9   | 0   |
| GATCGCGTTTTGAAGGA      | 0                                     | 2   | 5   | 0   | 14  | 2   | 1   | 0   | 0   | 0   | 0   | 0   | 9   | 0   |
| GATCGGCTTTCGTCCAA      | 0                                     | 2   | 0   | 24  | 0   | 0   | 0   | 0   | 3   | 0   | 0   | 0   | 2   | 0   |

Supplementary Table 1

| SIGNATURE <sup>a</sup> | Transcriptional activity <sup>b</sup> |     |     |     |     |     |     |     |     |     |     |     |     |     |
|------------------------|---------------------------------------|-----|-----|-----|-----|-----|-----|-----|-----|-----|-----|-----|-----|-----|
|                        | AGM                                   | AP1 | AP3 | CAS | GSE | INS | LES | ROS | S04 | S52 | SAP | SIS | OVL | SPL |
| GATCATACCTAAGCAAA      | 0                                     | 2   | 3   | 0   | 1   | 9   | 0   | 0   | 0   | 0   | 0   | 0   | 25  | 0   |
| GATCGCAGCCATGTTCC      | 0                                     | 3   | 0   | 0   | 14  | 0   | 0   | 20  | 0   | 0   | 9   | 10  | 24  | 6   |
| GATCGGAAAACAAATTG      | 0                                     | 2   | 24  | 0   | 0   | 2   | 5   | 0   | 10  | 0   | 8   | 0   | 2   | 0   |
| GATCGGAAAACCTTTGAA     | 0                                     | 4   | 6   | 5   | 0   | 0   | 2   | 2   | 10  | 1   | 1   | 20  | 1   | 0   |
| GATCGGAGAAAAAGGAT      | 0                                     | 3   | 0   | 14  | 8   | 0   | 0   | 10  | 0   | 0   | 1   | 0   | 3   | 9   |
| GATCTAGTCTCCAAGAT      | 0                                     | 2   | 0   | 3   | 0   | 0   | 0   | 0   | 0   | 0   | 0   | 0   | 4   | 0   |
| GATCTCATCTGAACCAC      | 0                                     | 2   | 6   | 8   | 0   | 0   | 0   | 2   | 0   | 0   | 2   | 35  | 4   | 0   |
| GATCTTGCTTGAACCAA      | 0                                     | 15  | 18  | 0   | 0   | 25  | 20  | 11  | 0   | 20  | 17  | 38  | 5   | 0   |
| GATCCAATCAGAGTCAA      | 0                                     | 7   | 0   | 3   | 0   | 0   | 0   | 0   | 0   | 0   | 8   | 0   | 12  | 0   |
| GATCTGTTTATCAGTTC      | 0                                     | 3   | 2   | 0   | 0   | 0   | 5   | 31  | 0   | 0   | 1   | 12  | 18  | 0   |
| GATCTCCCTCGGGTAC       | 0                                     | 2   | 7   | 7   | 0   | 1   | 0   | 0   | 0   | 0   | 0   | 11  | 19  | 3   |
| GATCTTCTACTGTTGCC      | 0                                     | 4   | 0   | 3   | 0   | 0   | 0   | 0   | 0   | 0   | 0   | 0   | 12  | 0   |
| GATCTTGAAACTGTCCGG     | 0                                     | 2   | 0   | 13  | 3   | 6   | 0   | 2   | 0   | 0   | 0   | 0   | 12  | 0   |
| GATCCAGCGTGGTGGAC      | 0                                     | 6   | 0   | 0   | 0   | 0   | 0   | 0   | 0   | 0   | 24  | 0   | 1   | 0   |
| GATCTCCACTGCAGTGA      | 0                                     | 5   | 0   | 0   | 0   | 0   | 0   | 0   | 0   | 0   | 0   | 0   | 16  | 2   |
| GATCAGTGAAACGAGAA      | 0                                     | 1   | 0   | 0   | 1   | 0   | 0   | 0   | 0   | 0   | 0   | 0   | 1   | 1   |
| GATCTCTCTGTACAGTT      | 0                                     | 5   | 2   | 12  | 2   | 10  | 3   | 16  | 0   | 0   | 1   | 0   | 38  | 63  |

Supplementary Table 1

| SIGNATURE <sup>a</sup> | Transcriptional activity <sup>b</sup> |     |     |     |     |     |     |     |     |     |     |     |     |     |
|------------------------|---------------------------------------|-----|-----|-----|-----|-----|-----|-----|-----|-----|-----|-----|-----|-----|
|                        | AGM                                   | AP1 | AP3 | CAS | GSE | INS | LES | ROS | S04 | S52 | SAP | SIS | OVL | SPL |
| GATCTCTCACTAAGCT       | 0                                     | 3   | 15  | 0   | 0   | 12  | 0   | 0   | 0   | 0   | 2   | 105 | 134 | 32  |
| GATCTCGGTGTGGGTGG      | 0                                     | 2   | 0   | 0   | 0   | 0   | 0   | 0   | 0   | 0   | 0   | 0   | 22  | 0   |
| GATCCACGTTCCGGTTGA     | 0                                     | 1   | 0   | 10  | 0   | 0   | 0   | 0   | 14  | 0   | 2   | 5   | 1   | 1   |
| GATCCAAAAGCCTGCGG      | 0                                     | 2   | 0   | 9   | 4   | 0   | 0   | 3   | 12  | 0   | 0   | 16  | 13  | 11  |
| GATCTACAAAACCTCAG      | 0                                     | 1   | 0   | 0   | 0   | 0   | 0   | 0   | 0   | 0   | 0   | 0   | 26  | 3   |
| GATCCAAGAAACAAGTT      | 0                                     | 2   | 3   | 0   | 0   | 0   | 4   | 2   | 0   | 0   | 0   | 0   | 3   | 0   |
| GATCTTCCTATACAAGT      | 0                                     | 1   | 1   | 0   | 0   | 2   | 0   | 10  | 0   | 0   | 20  | 0   | 2   | 0   |
| GATCTTGTTGICTCGGG      | 0                                     | 5   | 0   | 0   | 44  | 2   | 0   | 0   | 0   | 1   | 2   | 0   | 1   | 0   |
| GATCCCTACATGGCTTG      | 0                                     | 2   | 0   | 8   | 0   | 0   | 2   | 0   | 0   | 0   | 0   | 0   | 29  | 38  |
| GATCACTCCTCTCTGAT      | 0                                     | 1   | 0   | 21  | 0   | 0   | 39  | 3   | 0   | 0   | 0   | 0   | 24  | 0   |
| GATCTCTCGCTCTCTCC      | 0                                     | 1   | 0   | 0   | 0   | 0   | 3   | 2   | 0   | 0   | 0   | 0   | 7   | 33  |
| GATCAAATGGTATCACC      | 0                                     | 2   | 3   | 0   | 0   | 1   | 0   | 0   | 0   | 0   | 2   | 0   | 6   | 0   |
| GATCCTTCGATGTCAAT      | 0                                     | 1   | 2   | 35  | 0   | 0   | 1   | 8   | 0   | 16  | 0   | 0   | 2   | 0   |
| GATCTTCGTTTGAGTTG      | 0                                     | 1   | 0   | 3   | 0   | 2   | 8   | 0   | 0   | 0   | 6   | 0   | 1   | 0   |
| GATCACTTTTACGCTTG      | 0                                     | 1   | 0   | 0   | 0   | 0   | 0   | 0   | 0   | 0   | 0   | 0   | 9   | 0   |
| GATCAGTTCGCCCTTTC      | 0                                     | 1   | 0   | 0   | 0   | 0   | 0   | 0   | 0   | 0   | 0   | 0   | 6   | 3   |
| GATCGACAAGTCCAGAG      | 0                                     | 2   | 1   | 0   | 0   | 2   | 6   | 0   | 0   | 0   | 0   | 0   | 4   | 10  |

Supplementary Table 1

| SIGNATURE <sup>a</sup> | Transcriptional activity <sup>b</sup> |     |     |     |     |     |     |     |     |     |     |     |     |     |
|------------------------|---------------------------------------|-----|-----|-----|-----|-----|-----|-----|-----|-----|-----|-----|-----|-----|
|                        | AGM                                   | AP1 | AP3 | CAS | GSE | INS | LES | ROS | S04 | S52 | SAP | SIS | OVL | SPL |
| GATCCACTGCCAGGTCA      | 0                                     | 2   | 6   | 0   | 0   | 0   | 0   | 0   | 0   | 0   | 0   | 2   | 25  | 6   |
| GATCAAAGCTCAAGGTA      | 0                                     | 5   | 0   | 0   | 0   | 2   | 0   | 0   | 0   | 0   | 25  | 0   | 2   | 0   |
| GATCGGTTTCGAGAGTCG     | 0                                     | 4   | 4   | 13  | 18  | 1   | 3   | 29  | 0   | 3   | 18  | 0   | 44  | 46  |
| GATCGGCGGCGGCTAAT      | 0                                     | 1   | 0   | 0   | 0   | 0   | 0   | 0   | 0   | 0   | 2   | 0   | 1   | 0   |
| GATCACGAGTAGAGAGA      | 0                                     | 1   | 4   | 0   | 1   | 0   | 0   | 0   | 0   | 0   | 0   | 0   | 2   | 0   |
| GATCGGCGATAAGTTAA      | 0                                     | 0   | 1   | 0   | 0   | 0   | 0   | 6   | 0   | 0   | 0   | 0   | 1   | 1   |
| GATCCGTACGGTTGCTA      | 0                                     | 0   | 3   | 0   | 0   | 0   | 4   | 19  | 0   | 0   | 6   | 4   | 4   | 0   |
| GATCACAAAGAGTTTCT      | 0                                     | 0   | 2   | 0   | 0   | 0   | 0   | 0   | 0   | 0   | 0   | 0   | 2   | 0   |
| GATCACACTCGACAAAA      | 0                                     | 0   | 4   | 0   | 0   | 3   | 0   | 0   | 0   | 0   | 0   | 0   | 6   | 0   |
| GATCCTATACTTCTTTA      | 0                                     | 0   | 22  | 0   | 0   | 9   | 0   | 0   | 0   | 0   | 30  | 0   | 5   | 0   |
| GATCTTTTTTGATAGCT      | 0                                     | 0   | 30  | 75  | 0   | 1   | 0   | 0   | 0   | 0   | 49  | 3   | 15  | 10  |
| GATCAAACATCTAGTTA      | 0                                     | 0   | 1   | 0   | 0   | 1   | 28  | 16  | 0   | 0   | 0   | 38  | 2   | 0   |
| GATCTGGGTTCTTGTTG      | 0                                     | 0   | 1   | 0   | 0   | 0   | 0   | 2   | 0   | 0   | 38  | 0   | 2   | 0   |
| GATCAGAATCTGGAAAT      | 0                                     | 0   | 4   | 0   | 0   | 0   | 0   | 2   | 0   | 0   | 0   | 0   | 12  | 0   |
| GATCAGAAATCTCAGTT      | 0                                     | 0   | 3   | 0   | 0   | 0   | 0   | 0   | 0   | 3   | 0   | 0   | 28  | 0   |
| GATCATAGCGAGATTGA      | 0                                     | 0   | 5   | 1   | 0   | 0   | 0   | 0   | 0   | 0   | 3   | 6   | 5   | 0   |
| GATCCGACAGAACCCGA      | 0                                     | 0   | 4   | 0   | 0   | 0   | 0   | 0   | 0   | 0   | 0   | 3   | 1   | 0   |

Supplementary Table 1

| SIGNATURE <sup>a</sup> | Transcriptional activity <sup>b</sup> |     |     |     |     |     |     |     |     |     |     |     |     |     |
|------------------------|---------------------------------------|-----|-----|-----|-----|-----|-----|-----|-----|-----|-----|-----|-----|-----|
|                        | AGM                                   | AP1 | AP3 | CAS | GSE | INS | LES | ROS | S04 | S52 | SAP | SIS | OVL | SPL |
| GATCTGAGTTATGGATT      | 0                                     | 0   | 6   | 0   | 0   | 0   | 4   | 0   | 0   | 0   | 0   | 0   | 2   | 0   |
| GATCAGCTATGGCTAAG      | 0                                     | 0   | 2   | 0   | 2   | 1   | 0   | 2   | 0   | 14  | 0   | 0   | 5   | 7   |
| GATCGGTGTGTGTTGCA      | 0                                     | 0   | 2   | 0   | 0   | 1   | 0   | 0   | 0   | 0   | 35  | 0   | 19  | 5   |
| GATCATCCACACGACCT      | 0                                     | 0   | 1   | 0   | 0   | 0   | 0   | 4   | 1   | 1   | 0   | 0   | 4   | 0   |
| GATCTGCAAAGAAGAA       | 0                                     | 0   | 5   | 0   | 4   | 1   | 0   | 0   | 0   | 0   | 0   | 0   | 30  | 0   |
| GATCATTGTGAGGAATC      | 0                                     | 0   | 2   | 0   | 0   | 0   | 0   | 0   | 0   | 0   | 0   | 0   | 48  | 0   |
| GATCCAACTCACAACCTC     | 0                                     | 0   | 1   | 0   | 0   | 0   | 0   | 0   | 0   | 0   | 0   | 0   | 18  | 0   |
| GATCCTAATGGGTGGTG      | 0                                     | 0   | 2   | 0   | 0   | 0   | 0   | 0   | 0   | 0   | 0   | 0   | 8   | 0   |
| GATCCTGAATATAACCGA     | 0                                     | 0   | 2   | 30  | 11  | 0   | 8   | 0   | 0   | 0   | 0   | 0   | 1   | 19  |
| GATCGTTCTAATGACCA      | 0                                     | 0   | 1   | 0   | 0   | 0   | 0   | 2   | 0   | 3   | 0   | 13  | 1   | 0   |
| GATCTATAACAACCTGAC     | 0                                     | 0   | 1   | 0   | 0   | 1   | 0   | 0   | 0   | 0   | 0   | 0   | 8   | 0   |
| GATCAGTTGTTCACTTT      | 0                                     | 0   | 5   | 0   | 0   | 0   | 0   | 0   | 0   | 0   | 0   | 0   | 1   | 1   |
| GATCTGAACAATTGTGG      | 0                                     | 0   | 0   | 0   | 0   | 0   | 0   | 0   | 0   | 0   | 0   | 0   | 20  | 0   |
| GATCTGGTGTGTTGGG       | 0                                     | 0   | 0   | 8   | 0   | 0   | 0   | 0   | 0   | 0   | 0   | 0   | 5   | 2   |
| GATCTGTGTTACCAAAC      | 0                                     | 0   | 0   | 0   | 3   | 0   | 15  | 0   | 0   | 0   | 0   | 0   | 4   | 0   |
| GATCTTCATAAACTTTT      | 0                                     | 0   | 0   | 1   | 0   | 0   | 0   | 0   | 0   | 0   | 0   | 0   | 54  | 0   |
| GATCTTCGATAACCTTT      | 0                                     | 0   | 0   | 0   | 0   | 3   | 0   | 5   | 0   | 0   | 0   | 1   | 11  | 0   |



Supplementary Table 1

| SIGNATURE <sup>a</sup> | Transcriptional activity <sup>b</sup> |     |     |     |     |     |     |     |     |     |     |     |     |     |
|------------------------|---------------------------------------|-----|-----|-----|-----|-----|-----|-----|-----|-----|-----|-----|-----|-----|
|                        | AGM                                   | AP1 | AP3 | CAS | GSE | INS | LES | ROS | S04 | S52 | SAP | SIS | OVL | SPL |
| GATCCTCTCTGCTCTC       | 0                                     | 0   | 0   | 1   | 0   | 0   | 0   | 0   | 0   | 0   | 0   | 0   | 1   | 11  |
| GATCAAGCTTCGGTTGT      | 0                                     | 0   | 0   | 5   | 0   | 0   | 7   | 0   | 0   | 0   | 0   | 0   | 2   | 28  |
| GATCCGCTTTCAGCTT       | 0                                     | 0   | 0   | 24  | 0   | 0   | 1   | 1   | 0   | 0   | 0   | 0   | 1   | 0   |
| GATCCTTTGTTTCTCGC      | 0                                     | 0   | 0   | 4   | 0   | 0   | 0   | 0   | 0   | 0   | 0   | 0   | 1   | 0   |
| GATCGATAGGAGCATAAC     | 0                                     | 0   | 0   | 2   | 0   | 0   | 0   | 16  | 16  | 1   | 0   | 0   | 2   | 5   |
| GATCTGATGTAGACATG      | 0                                     | 0   | 0   | 2   | 0   | 0   | 0   | 0   | 0   | 0   | 0   | 0   | 1   | 0   |
| GATCAGCCGCAACGTC       | 0                                     | 0   | 0   | 6   | 0   | 0   | 50  | 0   | 33  | 0   | 22  | 105 | 148 | 89  |
| GATCTATGTTAGTGTTG      | 0                                     | 0   | 0   | 20  | 0   | 1   | 0   | 2   | 0   | 0   | 0   | 0   | 11  | 0   |
| GATCTAGATTCTCCGC       | 0                                     | 0   | 0   | 2   | 24  | 3   | 3   | 4   | 0   | 0   | 0   | 0   | 5   | 0   |
| GATCAGTGTGAGAAACA      | 0                                     | 0   | 0   | 1   | 0   | 1   | 0   | 0   | 0   | 0   | 0   | 0   | 8   | 0   |
| GATCAGCCATGGAGGAC      | 0                                     | 0   | 0   | 0   | 66  | 18  | 0   | 6   | 1   | 32  | 0   | 0   | 29  | 2   |
| GATCTGCTCTATTACTG      | 0                                     | 0   | 0   | 0   | 4   | 0   | 0   | 18  | 0   | 0   | 0   | 0   | 2   | 0   |
| GATCATCAAACCTTCAT      | 0                                     | 0   | 0   | 0   | 4   | 0   | 0   | 6   | 0   | 0   | 0   | 0   | 18  | 0   |
| GATCGCTATGACTATAG      | 0                                     | 0   | 0   | 0   | 36  | 1   | 0   | 0   | 16  | 5   | 0   | 0   | 2   | 0   |
| GATCACGTTGGAAGTGT      | 0                                     | 0   | 0   | 0   | 1   | 3   | 0   | 0   | 0   | 0   | 12  | 0   | 1   | 0   |
| GATCGACTCGATTTTGT      | 0                                     | 0   | 0   | 0   | 0   | 0   | 0   | 0   | 0   | 0   | 0   | 0   | 4   | 0   |
| GATCTTCTCTGTTTTGA      | 0                                     | 0   | 0   | 0   | 0   | 3   | 0   | 0   | 0   | 0   | 3   | 0   | 35  | 0   |

Supplementary Table 1

| SIGNATURE <sup>a</sup> | Transcriptional activity <sup>b</sup> |     |     |     |     |     |     |     |     |     |     |     |     |     |
|------------------------|---------------------------------------|-----|-----|-----|-----|-----|-----|-----|-----|-----|-----|-----|-----|-----|
|                        | AGM                                   | AP1 | AP3 | CAS | GSE | INS | LES | ROS | S04 | S52 | SAP | SIS | OVL | SPL |
| GATCTCTGAGGCCTTTT      | 0                                     | 0   | 0   | 0   | 0   | 0   | 0   | 0   | 0   | 0   | 0   | 0   | 18  | 0   |
| GATCCAATGCTTTTCAA      | 0                                     | 0   | 0   | 0   | 0   | 0   | 0   | 0   | 0   | 0   | 0   | 0   | 18  | 0   |
| GATCACAACGGTCATTA      | 0                                     | 0   | 0   | 0   | 0   | 0   | 0   | 0   | 0   | 0   | 0   | 0   | 25  | 0   |
| GATCCTTGTTTTACTCC      | 0                                     | 0   | 0   | 0   | 0   | 4   | 0   | 0   | 0   | 0   | 0   | 0   | 9   | 0   |
| GATCACAACCGTTGGTT      | 0                                     | 0   | 0   | 0   | 0   | 2   | 0   | 0   | 0   | 0   | 0   | 0   | 27  | 0   |
| GATCCTGTCTCCCTAGA      | 0                                     | 0   | 0   | 0   | 0   | 3   | 0   | 0   | 0   | 0   | 2   | 12  | 44  | 0   |
| GATCTGAGTTTGAGGCT      | 0                                     | 0   | 0   | 0   | 0   | 0   | 0   | 0   | 0   | 0   | 0   | 5   | 6   | 0   |
| GATCTACGTCGATGCGC      | 0                                     | 0   | 0   | 0   | 0   | 0   | 0   | 3   | 0   | 0   | 0   | 0   | 1   | 0   |
| GATCCACCAAATCTTGA      | 0                                     | 0   | 0   | 0   | 0   | 0   | 0   | 7   | 0   | 0   | 0   | 0   | 9   | 0   |
| GATCACTGACGGTATCT      | 0                                     | 0   | 0   | 0   | 0   | 0   | 3   | 0   | 0   | 0   | 0   | 0   | 30  | 0   |
| GATCAGGAAAGGTCAAG      | 0                                     | 0   | 0   | 0   | 0   | 0   | 3   | 0   | 0   | 0   | 0   | 0   | 53  | 15  |
| GATCTAGAGACGCAATT      | 0                                     | 0   | 0   | 0   | 0   | 0   | 4   | 0   | 0   | 0   | 0   | 10  | 2   | 0   |
| GATCAGAACCAAGTCAG      | 0                                     | 0   | 0   | 0   | 0   | 0   | 0   | 0   | 1   | 0   | 0   | 0   | 4   | 9   |
| GATCCAGATGAACTCTT      | 0                                     | 0   | 0   | 0   | 0   | 0   | 0   | 0   | 0   | 0   | 0   | 0   | 9   | 0   |
| GATCTCTCCGGTCGATT      | 0                                     | 0   | 0   | 0   | 0   | 0   | 0   | 0   | 0   | 0   | 8   | 0   | 9   | 0   |
| GATCCATATCTCAGTAT      | 0                                     | 0   | 0   | 0   | 0   | 0   | 0   | 0   | 0   | 0   | 0   | 0   | 1   | 0   |
| GATCAATTCCAATGTGC      | 0                                     | 0   | 0   | 0   | 0   | 0   | 0   | 0   | 0   | 0   | 0   | 26  | 2   | 0   |







Supplementary Table 2

Supplementary table 2 . *sporocyteless* ovules signatures from unannotated regions.

<sup>a</sup>MPSS 17pb signatures.

<sup>b</sup>Activity in transcripts per Million. AGM. *agamous* inflorescence. AP1. *petala1-10* inflorescence. AP3. *petala3-6* inflorescence. CAS. Callus. GSE. Germinating seedlings. INS. Inflorescences. LES. Leaves. ROS. Roots. S04. Leaves, 4 hr after salicylic acid treatment. S52. Leaves, 52 hr after salicylic acid treatment. SAP. *superman/apetala* inflorescence. SIS. Siliques. OVL. Wild type ovules. SPL. *sporocyteless* ovules.

| SIGNATURE <sup>a</sup> | Transcriptional activity <sup>b</sup> |     |     |     |     |     |     |     |     |     |     |     |     |     |
|------------------------|---------------------------------------|-----|-----|-----|-----|-----|-----|-----|-----|-----|-----|-----|-----|-----|
|                        | AGM                                   | AP1 | AP3 | CAS | GSE | INS | LES | ROS | S04 | S52 | SAP | SIS | OVL | SPL |
| GATCTATGGAATCGAGT      | 4                                     | 3   | 7   | 14  | 0   | 0   | 30  | 13  | 0   | 13  | 0   | 21  | 0   | 1   |
| GATCTGCAAGACGAAAA      | 208                                   | 135 | 103 | 42  | 19  | 263 | 221 | 951 | 163 | 267 | 83  | 34  | 183 | 120 |
| GATCTGCTTTTGTCGCA      | 12                                    | 0   | 1   | 0   | 5   | 0   | 5   | 2   | 0   | 1   | 0   | 0   | 9   | 7   |
| GATCCAAACCTAATACC      | 13                                    | 5   | 1   | 50  | 0   | 5   | 30  | 0   | 0   | 3   | 3   | 29  | 30  | 16  |
| GATCTGTTGTTGGACCT      | 18                                    | 46  | 61  | 0   | 13  | 12  | 32  | 21  | 51  | 23  | 26  | 23  | 95  | 10  |
| GATCTTATCGGCCGGCA      | 2                                     | 0   | 4   | 0   | 0   | 1   | 0   | 8   | 5   | 44  | 10  | 0   | 0   | 8   |
| GATCTTCCCTTTTCTTG      | 20                                    | 1   | 19  | 17  | 0   | 0   | 0   | 7   | 0   | 0   | 0   | 35  | 3   | 26  |
| GATCTTCGCAAGAGAAT      | 1                                     | 2   | 0   | 0   | 2   | 0   | 0   | 0   | 0   | 7   | 2   | 0   | 0   | 2   |
| GATCTTCGTTGGTGACC      | 1                                     | 2   | 0   | 5   | 0   | 3   | 3   | 22  | 0   | 3   | 1   | 0   | 7   | 11  |
| GATCCATCAGGGGAGGA      | 14                                    | 7   | 4   | 21  | 0   | 3   | 0   | 6   | 3   | 0   | 0   | 1   | 14  | 35  |
| GATCTTGTGGATGCCCT      | 3                                     | 10  | 7   | 31  | 0   | 3   | 12  | 13  | 0   | 0   | 0   | 2   | 29  | 37  |
| GATCTTGTGGTGGCAG       | 13                                    | 12  | 8   | 14  | 0   | 7   | 0   | 6   | 0   | 24  | 0   | 6   | 163 | 38  |
| GATCCCAAGATGCTGAG      | 9                                     | 12  | 4   | 105 | 0   | 2   | 34  | 1   | 0   | 0   | 1   | 60  | 5   | 19  |

Supplementary Table 2

| SIGNATURE <sup>a</sup> | Transcriptional activity <sup>b</sup> |     |     |     |     |     |     |     |     |     |     |     |     |     |
|------------------------|---------------------------------------|-----|-----|-----|-----|-----|-----|-----|-----|-----|-----|-----|-----|-----|
|                        | AGM                                   | AP1 | AP3 | CAS | GSE | INS | LES | ROS | S04 | S52 | SAP | SIS | OVL | SPL |
| GATCTTGTTCCGACGA       | 13                                    | 28  | 35  | 15  | 80  | 43  | 4   | 25  | 6   | 14  | 10  | 19  | 72  | 25  |
| GATCCCATCTGGGAACG      | 4                                     | 16  | 16  | 12  | 0   | 3   | 2   | 6   | 7   | 0   | 19  | 0   | 5   | 3   |
| GATCCCCAATGATTTTC      | 5                                     | 2   | 9   | 60  | 0   | 2   | 1   | 31  | 3   | 40  | 17  | 0   | 42  | 2   |
| GATCCCGAAAACCTAACC     | 51                                    | 38  | 18  | 10  | 65  | 22  | 1   | 18  | 14  | 53  | 80  | 52  | 260 | 167 |
| GATCCCTTGAGCAAAAC      | 6                                     | 0   | 2   | 0   | 0   | 0   | 0   | 0   | 0   | 0   | 0   | 0   | 0   | 1   |
| GATCCGAATCAATTCTC      | 3                                     | 5   | 4   | 0   | 0   | 1   | 0   | 0   | 0   | 0   | 0   | 10  | 27  | 1   |
| GATCCGATGCGAACAAT      | 21                                    | 24  | 5   | 16  | 27  | 3   | 0   | 34  | 7   | 0   | 63  | 0   | 0   | 14  |
| GATCAAAACTCCAACAG      | 6                                     | 2   | 9   | 29  | 0   | 13  | 0   | 2   | 4   | 17  | 0   | 0   | 1   | 39  |
| GATCAAAAAGTTCCAAAC     | 5                                     | 0   | 0   | 0   | 20  | 0   | 1   | 0   | 0   | 0   | 0   | 0   | 0   | 1   |
| GATCCTAACCGTTGTCC      | 60                                    | 35  | 26  | 138 | 0   | 82  | 42  | 80  | 17  | 40  | 48  | 81  | 60  | 65  |
| GATCCTAAGCTCATGAA      | 9                                     | 8   | 24  | 29  | 0   | 12  | 3   | 6   | 0   | 1   | 35  | 4   | 19  | 3   |
| GATCCTCTCAGCTATTC      | 20                                    | 29  | 5   | 0   | 0   | 10  | 6   | 0   | 0   | 5   | 46  | 96  | 317 | 39  |
| GATCATTGGTTCTTGCA      | 1                                     | 3   | 2   | 3   | 0   | 0   | 0   | 0   | 0   | 0   | 0   | 0   | 0   | 2   |
| GATCAACGATTCCATCC      | 9                                     | 0   | 6   | 0   | 0   | 0   | 19  | 0   | 0   | 0   | 4   | 15  | 5   | 3   |
| GATCCTGAAGATTAAGT      | 10                                    | 7   | 8   | 61  | 0   | 11  | 2   | 43  | 0   | 0   | 0   | 12  | 1   | 2   |
| GATCAAGACTTGACTCT      | 43                                    | 16  | 28  | 0   | 2   | 36  | 2   | 28  | 11  | 0   | 7   | 16  | 0   | 6   |
| GATCCTGTCAACGAACC      | 14                                    | 10  | 5   | 15  | 0   | 13  | 24  | 24  | 0   | 5   | 0   | 5   | 57  | 21  |
| GATCCTTCCCTTGGAAT      | 8                                     | 7   | 2   | 0   | 0   | 4   | 0   | 0   | 0   | 2   | 37  | 0   | 43  | 16  |

Supplementary Table 2

| SIGNATURE <sup>a</sup> | Transcriptional activity <sup>b</sup> |     |     |     |     |     |     |     |     |     |     |     |     |     |
|------------------------|---------------------------------------|-----|-----|-----|-----|-----|-----|-----|-----|-----|-----|-----|-----|-----|
|                        | AGM                                   | AP1 | AP3 | CAS | GSE | INS | LES | ROS | S04 | S52 | SAP | SIS | OVL | SPL |
| GATCAAGTTTCAGAGTC      | 2                                     | 2   | 0   | 0   | 18  | 2   | 0   | 0   | 0   | 0   | 12  | 0   | 38  | 23  |
| GATCAATAAAGTGTGCC      | 33                                    | 2   | 10  | 92  | 0   | 4   | 66  | 23  | 7   | 4   | 0   | 89  | 27  | 65  |
| GATCCTTGTTCCCTTT       | 23                                    | 57  | 77  | 25  | 2   | 66  | 9   | 60  | 42  | 7   | 22  | 22  | 35  | 18  |
| GATCCTTCTGGCGAA        | 11                                    | 2   | 10  | 0   | 0   | 3   | 3   | 0   | 0   | 0   | 6   | 0   | 51  | 57  |
| GATCCGACTACATCAAG      | 9                                     | 1   | 0   | 0   | 0   | 0   | 0   | 0   | 0   | 0   | 0   | 0   | 0   | 5   |
| GATCCGCTTGAGACTGG      | 3                                     | 0   | 5   | 0   | 0   | 5   | 1   | 0   | 0   | 0   | 26  | 0   | 0   | 36  |
| GATCAATGCCAAGTCTC      | 23                                    | 7   | 24  | 63  | 0   | 9   | 1   | 34  | 4   | 1   | 2   | 65  | 94  | 87  |
| GATCACAACCAACGAAA      | 3                                     | 4   | 0   | 0   | 0   | 0   | 0   | 0   | 5   | 1   | 0   | 0   | 1   | 1   |
| GATCACAGTCACTTGCT      | 16                                    | 17  | 23  | 0   | 53  | 13  | 62  | 0   | 12  | 37  | 16  | 43  | 21  | 6   |
| GATCCTTTTGACAGGAC      | 11                                    | 4   | 15  | 29  | 0   | 3   | 0   | 4   | 0   | 0   | 7   | 6   | 12  | 16  |
| GATCCTTTTGACCATCC      | 17                                    | 2   | 2   | 8   | 0   | 7   | 20  | 0   | 0   | 2   | 45  | 27  | 0   | 38  |
| GATCCGGTGGAGCAAGA      | 2                                     | 0   | 0   | 0   | 0   | 4   | 0   | 0   | 1   | 0   | 0   | 0   | 0   | 5   |
| GATCCTAACGACGTCGT      | 1                                     | 1   | 0   | 0   | 0   | 0   | 3   | 2   | 0   | 0   | 31  | 0   | 0   | 20  |
| GATCGAATCCAATATCT      | 7                                     | 0   | 0   | 0   | 0   | 3   | 0   | 2   | 0   | 0   | 0   | 0   | 0   | 1   |
| GATCGACGGTGGTTAGT      | 171                                   | 59  | 44  | 287 | 9   | 22  | 36  | 24  | 25  | 16  | 109 | 56  | 121 | 116 |
| GATCACCAAAATCAGGA      | 9                                     | 4   | 27  | 0   | 2   | 17  | 12  | 18  | 12  | 3   | 0   | 3   | 69  | 5   |
| GATCACCATCTTGTTGCG     | 7                                     | 16  | 1   | 0   | 7   | 13  | 1   | 29  | 0   | 0   | 2   | 1   | 23  | 6   |
| GATCGAGGTCTCTCTTT      | 13                                    | 4   | 10  | 9   | 9   | 10  | 1   | 26  | 4   | 18  | 0   | 0   | 24  | 17  |

Supplementary Table 2

| SIGNATURE <sup>a</sup> | Transcriptional activity <sup>b</sup> |     |     |     |     |     |     |     |     |     |     |     |     |     |
|------------------------|---------------------------------------|-----|-----|-----|-----|-----|-----|-----|-----|-----|-----|-----|-----|-----|
|                        | AGM                                   | AP1 | AP3 | CAS | GSE | INS | LES | ROS | S04 | S52 | SAP | SIS | OVL | SPL |
| GATCGCAAGACTCGTGC      | 43                                    | 58  | 44  | 95  | 43  | 36  | 29  | 186 | 3   | 15  | 28  | 51  | 131 | 160 |
| GATCGAAACCTTCGCAA      | 2                                     | 0   | 0   | 0   | 0   | 0   | 5   | 34  | 0   | 0   | 2   | 0   | 0   | 12  |
| GATCGACATTGTATCTC      | 1                                     | 0   | 2   | 0   | 0   | 0   | 0   | 0   | 0   | 0   | 0   | 0   | 0   | 2   |
| GATCGGACTATGCAAAT      | 2                                     | 0   | 0   | 0   | 2   | 13  | 0   | 2   | 0   | 13  | 0   | 0   | 0   | 2   |
| GATCACTCTTCAACCAA      | 3                                     | 1   | 4   | 52  | 0   | 0   | 8   | 17  | 0   | 2   | 0   | 15  | 41  | 15  |
| GATCGGGGATTGGGAGA      | 3                                     | 0   | 0   | 0   | 0   | 0   | 0   | 0   | 44  | 0   | 0   | 0   | 0   | 1   |
| GATCGGTTTCGTGGCTG      | 7                                     | 0   | 0   | 0   | 0   | 0   | 0   | 0   | 0   | 0   | 0   | 0   | 1   | 1   |
| GATCGGAAGCGTCGATG      | 12                                    | 12  | 36  | 63  | 3   | 22  | 21  | 64  | 19  | 0   | 6   | 46  | 22  | 145 |
| GATCGGAAGTTTGCTCA      | 41                                    | 95  | 31  | 29  | 0   | 27  | 10  | 27  | 21  | 17  | 30  | 15  | 45  | 73  |
| GATCGGCAAAGGTGGAG      | 13                                    | 0   | 5   | 191 | 11  | 19  | 3   | 0   | 0   | 0   | 0   | 0   | 0   | 36  |
| GATCGGCGGAAGGGAAA      | 10                                    | 2   | 0   | 19  | 0   | 0   | 0   | 0   | 0   | 0   | 0   | 0   | 0   | 1   |
| GATCGTCGACTCCTTGT      | 472                                   | 280 | 318 | 119 | 31  | 277 | 235 | 321 | 157 | 227 | 106 | 137 | 414 | 220 |
| GATCGTCGTGTCAAGGC      | 28                                    | 0   | 0   | 0   | 11  | 0   | 0   | 0   | 0   | 0   | 0   | 0   | 0   | 12  |
| GATCATCGACAGCCTCC      | 11                                    | 23  | 13  | 10  | 3   | 24  | 0   | 34  | 0   | 0   | 16  | 46  | 67  | 80  |
| GATCATCGGAGGTA CTG     | 1                                     | 2   | 10  | 0   | 0   | 0   | 0   | 11  | 0   | 9   | 0   | 0   | 16  | 16  |
| GATCTACGGAGCCATTT      | 47                                    | 11  | 32  | 124 | 108 | 2   | 1   | 48  | 42  | 3   | 18  | 18  | 139 | 213 |
| GATCTGAAAAGCAAGGA      | 16                                    | 19  | 0   | 0   | 0   | 0   | 0   | 3   | 0   | 5   | 0   | 0   | 0   | 4   |
| GATCTGAAGAAACCAAC      | 22                                    | 37  | 52  | 16  | 33  | 30  | 8   | 34  | 12  | 10  | 74  | 30  | 17  | 14  |

Supplementary Table 2

| SIGNATURE <sup>a</sup> | Transcriptional activity <sup>b</sup> |     |     |     |     |     |     |     |     |     |     |     |     |     |
|------------------------|---------------------------------------|-----|-----|-----|-----|-----|-----|-----|-----|-----|-----|-----|-----|-----|
|                        | AGM                                   | AP1 | AP3 | CAS | GSE | INS | LES | ROS | S04 | S52 | SAP | SIS | OVL | SPL |
| GATCATGCCTAATCTGC      | 22                                    | 13  | 19  | 81  | 1   | 17  | 8   | 59  | 18  | 2   | 4   | 134 | 177 | 119 |
| GATCTGATGCTTGTTGG      | 7                                     | 2   | 5   | 0   | 2   | 3   | 3   | 31  | 10  | 0   | 36  | 7   | 1   | 48  |
| GATCAAACATGGGTTTC      | 10                                    | 10  | 15  | 29  | 5   | 6   | 35  | 64  | 12  | 18  | 29  | 6   | 88  | 21  |
| GATCTTTACTGGTGAAA      | 22                                    | 7   | 15  | 0   | 0   | 16  | 0   | 0   | 0   | 0   | 8   | 0   | 1   | 1   |
| GATCACCTCTGATTGAG      | 3                                     | 6   | 12  | 18  | 0   | 5   | 22  | 14  | 0   | 3   | 1   | 0   | 6   | 10  |
| GATCACGGAGACTGAGT      | 3                                     | 2   | 0   | 0   | 0   | 0   | 1   | 4   | 0   | 0   | 0   | 0   | 0   | 4   |
| GATCTTCATCGGTCACT      | 9                                     | 2   | 2   | 0   | 2   | 0   | 3   | 10  | 1   | 0   | 0   | 0   | 1   | 14  |
| GATCTTCCGCCATCGCT      | 6                                     | 12  | 10  | 20  | 0   | 3   | 0   | 0   | 3   | 0   | 13  | 9   | 66  | 3   |
| GATCCGGTTAAAATTC       | 35                                    | 59  | 19  | 174 | 90  | 39  | 11  | 212 | 33  | 11  | 48  | 16  | 12  | 50  |
| GATCCGCCATGGAAGGA      | 3                                     | 12  | 1   | 0   | 0   | 0   | 0   | 0   | 0   | 0   | 6   | 0   | 1   | 21  |
| GATCAGCAGAAGAAAGA      | 7                                     | 25  | 0   | 0   | 0   | 0   | 0   | 0   | 0   | 3   | 10  | 26  | 0   | 2   |
| GATCAAGTTTAGTGCCT      | 14                                    | 17  | 33  | 0   | 0   | 8   | 9   | 15  | 3   | 0   | 0   | 34  | 41  | 20  |
| GATCAATTCGCTTAACT      | 4                                     | 19  | 11  | 0   | 0   | 5   | 3   | 16  | 0   | 0   | 17  | 8   | 34  | 21  |
| GATCTCTCTGCCTAAAA      | 2                                     | 2   | 0   | 0   | 0   | 5   | 3   | 0   | 0   | 0   | 0   | 0   | 0   | 2   |
| GATCGTTTTTTCCAATT      | 3                                     | 0   | 4   | 6   | 2   | 0   | 0   | 6   | 0   | 6   | 0   | 0   | 0   | 18  |
| GATCTAAGAACTTGAA       | 3                                     | 1   | 12  | 0   | 0   | 0   | 0   | 0   | 0   | 1   | 34  | 0   | 0   | 2   |
| GATCTAAGTTGCTTGAA      | 10                                    | 9   | 0   | 0   | 16  | 0   | 0   | 25  | 2   | 0   | 0   | 0   | 0   | 2   |
| GATCTACAATTTTGACG      | 9                                     | 8   | 18  | 59  | 0   | 6   | 47  | 35  | 1   | 9   | 13  | 73  | 45  | 7   |

Supplementary Table 2

| SIGNATURE <sup>a</sup> | Transcriptional activity <sup>b</sup> |     |     |     |     |     |     |     |     |     |     |     |     |     |
|------------------------|---------------------------------------|-----|-----|-----|-----|-----|-----|-----|-----|-----|-----|-----|-----|-----|
|                        | AGM                                   | AP1 | AP3 | CAS | GSE | INS | LES | ROS | S04 | S52 | SAP | SIS | OVL | SPL |
| GATCCCATAGCAGGCCG      | 5                                     | 2   | 0   | 16  | 0   | 0   | 0   | 0   | 0   | 0   | 0   | 74  | 2   | 1   |
| GATCCCAGGACTTATG       | 13                                    | 15  | 5   | 6   | 0   | 8   | 19  | 3   | 163 | 22  | 14  | 74  | 61  | 3   |
| GATCCTCCTAGGAGAGG      | 4                                     | 27  | 28  | 5   | 6   | 6   | 63  | 45  | 43  | 2   | 41  | 11  | 2   | 34  |
| GATCCTCTCAAACCGC       | 6                                     | 6   | 0   | 0   | 0   | 0   | 0   | 2   | 0   | 25  | 0   | 0   | 3   | 2   |
| GATCAATTCTTCTCTCA      | 1                                     | 1   | 5   | 81  | 0   | 7   | 1   | 0   | 0   | 0   | 0   | 6   | 9   | 12  |
| GATCTTCTCATCTACCC      | 1                                     | 0   | 3   | 6   | 0   | 0   | 0   | 0   | 0   | 0   | 2   | 0   | 0   | 6   |
| GATCATTGGATTGTCTC      | 1                                     | 0   | 5   | 0   | 0   | 0   | 6   | 0   | 0   | 0   | 8   | 0   | 32  | 1   |
| GATCCAAAGCAACCTCA      | 1                                     | 3   | 0   | 0   | 0   | 0   | 0   | 3   | 0   | 0   | 0   | 0   | 0   | 28  |
| GATCAAGTTTGCTTCTG      | 5                                     | 2   | 4   | 0   | 0   | 0   | 0   | 15  | 0   | 0   | 0   | 0   | 69  | 6   |
| GATCATTGTTTCTGGTG      | 1                                     | 0   | 4   | 0   | 0   | 5   | 0   | 10  | 0   | 0   | 0   | 11  | 0   | 12  |
| GATCTTCTGAAACTGGG      | 3                                     | 19  | 5   | 45  | 2   | 3   | 0   | 5   | 0   | 0   | 6   | 1   | 0   | 8   |
| GATCCTTCTGAGCCTTC      | 1                                     | 11  | 6   | 3   | 22  | 2   | 8   | 6   | 0   | 0   | 0   | 7   | 6   | 4   |
| GATCGTTGGTTGCGTTT      | 1                                     | 0   | 0   | 0   | 0   | 0   | 6   | 2   | 1   | 0   | 3   | 0   | 5   | 83  |
| GATCGGAGGCTGGAGAG      | 1                                     | 2   | 0   | 3   | 3   | 3   | 0   | 0   | 0   | 0   | 0   | 0   | 0   | 6   |
| GATCTTGACTGGTCTGA      | 1                                     | 2   | 6   | 0   | 0   | 0   | 0   | 2   | 0   | 0   | 0   | 34  | 15  | 8   |
| GATCTAAGTAGATTCCG      | 45                                    | 114 | 313 | 80  | 281 | 35  | 70  | 229 | 46  | 93  | 205 | 0   | 435 | 390 |
| GATCTATTTATCCCTGA      | 2                                     | 0   | 0   | 0   | 10  | 2   | 0   | 0   | 29  | 11  | 2   | 4   | 0   | 1   |



Supplementary Table 2

| SIGNATURE <sup>a</sup> | Transcriptional activity <sup>b</sup> |     |     |     |     |     |     |     |     |     |     |     |     |     |
|------------------------|---------------------------------------|-----|-----|-----|-----|-----|-----|-----|-----|-----|-----|-----|-----|-----|
|                        | AGM                                   | AP1 | AP3 | CAS | GSE | INS | LES | ROS | S04 | S52 | SAP | SIS | OVL | SPL |
| GATCATGAGTTCTCGGA      | 1                                     | 2   | 9   | 0   | 0   | 0   | 0   | 2   | 0   | 0   | 0   | 0   | 0   | 1   |
| GATCAAAGCCACCAAGT      | 1                                     | 1   | 0   | 0   | 0   | 0   | 0   | 1   | 0   | 0   | 0   | 0   | 16  | 6   |
| GATCAAAGGAAGACACC      | 3                                     | 9   | 3   | 1   | 0   | 3   | 5   | 2   | 0   | 0   | 2   | 0   | 0   | 9   |
| GATCTGTGTTGAGAATG      | 5                                     | 26  | 24  | 0   | 5   | 12  | 9   | 34  | 0   | 0   | 6   | 0   | 0   | 1   |
| GATCCGAAAATTTTCCC      | 2                                     | 0   | 0   | 0   | 0   | 0   | 0   | 14  | 0   | 0   | 0   | 0   | 0   | 2   |
| GATCGGAGTCGAAATCA      | 1                                     | 3   | 2   | 0   | 2   | 0   | 3   | 0   | 0   | 0   | 16  | 0   | 5   | 10  |
| GATCCAGTAACTGCTGA      | 2                                     | 16  | 3   | 0   | 0   | 6   | 0   | 0   | 0   | 0   | 0   | 0   | 0   | 3   |
| GATCTGCAAATCGGTAG      | 3                                     | 4   | 15  | 39  | 3   | 9   | 0   | 0   | 0   | 0   | 0   | 0   | 63  | 50  |
| GATCATTGCGTTTGGTT      | 0                                     | 1   | 3   | 0   | 0   | 4   | 0   | 4   | 0   | 0   | 1   | 0   | 0   | 6   |
| GATCCAAAGCAGAAGAT      | 0                                     | 2   | 6   | 7   | 0   | 0   | 3   | 0   | 0   | 12  | 0   | 0   | 12  | 17  |
| GATCCGGTGAGGAAGAA      | 0                                     | 4   | 1   | 30  | 0   | 0   | 2   | 5   | 0   | 18  | 0   | 0   | 0   | 6   |
| GATCTGAGCCAAAACCG      | 0                                     | 19  | 1   | 0   | 0   | 8   | 0   | 0   | 0   | 0   | 11  | 24  | 8   | 25  |
| GATCCCTCTCCTGAATT      | 0                                     | 2   | 2   | 1   | 3   | 0   | 0   | 4   | 0   | 0   | 0   | 0   | 47  | 1   |
| GATCCGGCATTAGTCGT      | 0                                     | 1   | 19  | 50  | 0   | 0   | 0   | 0   | 0   | 0   | 0   | 0   | 11  | 15  |
| GATCTGTCTTAGTCCCC      | 0                                     | 15  | 8   | 7   | 1   | 14  | 0   | 5   | 0   | 38  | 7   | 4   | 56  | 103 |
| GATCCTAGAGGTGCAGG      | 0                                     | 2   | 2   | 0   | 0   | 4   | 0   | 0   | 0   | 0   | 0   | 0   | 0   | 5   |
| GATCGCAGCCATGTTCC      | 0                                     | 3   | 0   | 0   | 14  | 0   | 0   | 20  | 0   | 0   | 9   | 10  | 24  | 6   |

Supplementary Table 2

| SIGNATURE <sup>a</sup> | Transcriptional activity <sup>b</sup> |     |     |     |     |     |     |     |     |     |     |     |     |     |
|------------------------|---------------------------------------|-----|-----|-----|-----|-----|-----|-----|-----|-----|-----|-----|-----|-----|
|                        | AGM                                   | AP1 | AP3 | CAS | GSE | INS | LES | ROS | S04 | S52 | SAP | SIS | OVL | SPL |
| GATCGGAGAAAAAGGAT      | 0                                     | 3   | 0   | 14  | 8   | 0   | 0   | 10  | 0   | 0   | 1   | 0   | 3   | 9   |
| GATCTGCAACGCGTAAA      | 0                                     | 1   | 0   | 14  | 0   | 0   | 0   | 1   | 1   | 0   | 15  | 0   | 0   | 11  |
| GATCTTCCCTCGGGTAC      | 0                                     | 2   | 7   | 7   | 0   | 1   | 0   | 0   | 0   | 0   | 0   | 11  | 19  | 3   |
| GATCCACGGCAACCTTT      | 0                                     | 19  | 13  | 8   | 0   | 2   | 0   | 7   | 0   | 0   | 44  | 15  | 0   | 13  |
| GATCTCCACTGCAGTGA      | 0                                     | 5   | 0   | 0   | 0   | 0   | 0   | 0   | 0   | 0   | 0   | 0   | 16  | 2   |
| GATCTCTCTGTACAGTT      | 0                                     | 5   | 2   | 12  | 2   | 10  | 3   | 16  | 0   | 0   | 1   | 0   | 38  | 63  |
| GATCTCTTCACTAAGCT      | 0                                     | 3   | 15  | 0   | 0   | 12  | 0   | 0   | 0   | 0   | 2   | 105 | 134 | 32  |
| GATCCACGTTTCGGTTGA     | 0                                     | 1   | 0   | 10  | 0   | 0   | 0   | 0   | 14  | 0   | 2   | 5   | 1   | 1   |
| GATCAGTGAAACGAGAA      | 0                                     | 1   | 0   | 0   | 1   | 0   | 0   | 0   | 0   | 0   | 0   | 0   | 1   | 1   |
| GATCATAATCCTGAGTC      | 0                                     | 2   | 4   | 0   | 0   | 0   | 0   | 0   | 0   | 0   | 0   | 0   | 0   | 1   |
| GATCGGACAAAAGTCGC      | 0                                     | 1   | 0   | 0   | 10  | 0   | 0   | 0   | 0   | 0   | 0   | 0   | 0   | 22  |
| GATCGTCTTCTTCTTTC      | 0                                     | 1   | 5   | 8   | 0   | 0   | 0   | 0   | 0   | 0   | 2   | 0   | 0   | 3   |
| GATCCAAAAGCCTGCGG      | 0                                     | 2   | 0   | 9   | 4   | 0   | 0   | 3   | 12  | 0   | 0   | 16  | 13  | 11  |
| GATCTACAAAACCTTCAG     | 0                                     | 1   | 0   | 0   | 0   | 0   | 0   | 0   | 0   | 0   | 0   | 0   | 26  | 3   |
| GATCGGGATAAAAACGG      | 0                                     | 2   | 0   | 0   | 0   | 0   | 0   | 0   | 0   | 0   | 0   | 0   | 0   | 25  |
| GATCGGTGAGAATGGGG      | 0                                     | 10  | 0   | 0   | 0   | 0   | 0   | 0   | 0   | 0   | 0   | 0   | 0   | 17  |
| GATCTCGACCGAACTAT      | 0                                     | 1   | 0   | 0   | 0   | 2   | 0   | 0   | 0   | 2   | 15  | 0   | 0   | 7   |

Supplementary Table 2

| SIGNATURE <sup>a</sup> | Transcriptional activity <sup>b</sup> |     |     |     |     |     |     |     |     |     |     |     |     |     |
|------------------------|---------------------------------------|-----|-----|-----|-----|-----|-----|-----|-----|-----|-----|-----|-----|-----|
|                        | AGM                                   | AP1 | AP3 | CAS | GSE | INS | LES | ROS | S04 | S52 | SAP | SIS | OVL | SPL |
| GATCGTCTCCGAGTCTA      | 0                                     | 4   | 0   | 0   | 0   | 0   | 0   | 0   | 0   | 0   | 0   | 0   | 0   | 3   |
| GATCTTGAAGGGACATT      | 0                                     | 2   | 15  | 0   | 0   | 24  | 3   | 0   | 2   | 3   | 0   | 0   | 0   | 1   |
| GATCCCTACATGGCTTG      | 0                                     | 2   | 0   | 8   | 0   | 0   | 2   | 0   | 0   | 0   | 0   | 0   | 29  | 38  |
| GATCCCTCCAGAGTCCA      | 0                                     | 1   | 1   | 0   | 0   | 0   | 3   | 2   | 0   | 0   | 0   | 0   | 0   | 36  |
| GATCCGTTGGTCGGAAG      | 0                                     | 4   | 0   | 0   | 0   | 0   | 0   | 0   | 0   | 0   | 0   | 0   | 0   | 24  |
| GATCTCTCGCTCTCTCC      | 0                                     | 1   | 0   | 0   | 0   | 0   | 3   | 2   | 0   | 0   | 0   | 0   | 7   | 33  |
| GATCCGCTTCTGAGGCT      | 0                                     | 1   | 0   | 77  | 0   | 0   | 0   | 17  | 0   | 0   | 0   | 0   | 0   | 1   |
| GATCAGTTCGCCCTTTC      | 0                                     | 1   | 0   | 0   | 0   | 0   | 0   | 0   | 0   | 0   | 0   | 0   | 6   | 3   |
| GATCGACAAGTCCAGAG      | 0                                     | 2   | 1   | 0   | 0   | 2   | 6   | 0   | 0   | 0   | 0   | 0   | 4   | 10  |
| GATCCACTGCCAGGTCA      | 0                                     | 2   | 6   | 0   | 0   | 0   | 0   | 0   | 0   | 0   | 0   | 2   | 25  | 6   |
| GATCGAGTGCTGTAGA       | 0                                     | 4   | 1   | 0   | 0   | 1   | 0   | 0   | 0   | 0   | 10  | 0   | 0   | 1   |
| GATCAAAGACTTGATTT      | 0                                     | 6   | 9   | 0   | 0   | 0   | 0   | 1   | 0   | 0   | 0   | 0   | 0   | 1   |
| GATCTGTAGCTGCTCTC      | 0                                     | 4   | 0   | 1   | 0   | 0   | 0   | 0   | 3   | 8   | 0   | 15  | 0   | 2   |
| GATCCTTTGTTGTTGCG      | 0                                     | 1   | 0   | 0   | 0   | 0   | 0   | 0   | 0   | 0   | 2   | 0   | 0   | 8   |
| GATCGGTTTCGAGAGTCG     | 0                                     | 4   | 4   | 13  | 18  | 1   | 3   | 29  | 0   | 3   | 18  | 0   | 44  | 46  |
| GATCAGAACAGACCGCA      | 0                                     | 1   | 0   | 0   | 0   | 19  | 0   | 2   | 0   | 0   | 0   | 5   | 0   | 2   |
| GATCGCTTGGAAGCGTT      | 0                                     | 1   | 1   | 0   | 0   | 2   | 7   | 9   | 11  | 0   | 0   | 1   | 0   | 1   |







Supplementary Table 2

| SIGNATURE <sup>a</sup> | Transcriptional activity <sup>b</sup> |     |     |     |     |     |     |     |     |     |     |     |     |     |
|------------------------|---------------------------------------|-----|-----|-----|-----|-----|-----|-----|-----|-----|-----|-----|-----|-----|
|                        | AGM                                   | AP1 | AP3 | CAS | GSE | INS | LES | ROS | S04 | S52 | SAP | SIS | OVL | SPL |
| GATCTAATGAGAACGCA      | 0                                     | 0   | 0   | 0   | 2   | 0   | 0   | 0   | 0   | 0   | 0   | 0   | 0   | 11  |
| GATCGAAGTATCTCGTC      | 0                                     | 0   | 0   | 0   | 1   | 0   | 0   | 0   | 0   | 0   | 0   | 0   | 0   | 11  |
| GATCGAAGTCCGAGGA       | 0                                     | 0   | 0   | 0   | 3   | 2   | 0   | 0   | 0   | 0   | 0   | 0   | 0   | 16  |
| GATCTTATGTTGTGTGT      | 0                                     | 0   | 0   | 0   | 2   | 0   | 0   | 0   | 0   | 1   | 0   | 0   | 0   | 27  |
| GATCAGGAAAATGAGTT      | 0                                     | 0   | 0   | 0   | 0   | 0   | 0   | 0   | 0   | 0   | 0   | 0   | 0   | 10  |
| GATCTGTGAGAATACCT      | 0                                     | 0   | 0   | 0   | 0   | 0   | 1   | 0   | 0   | 0   | 0   | 0   | 0   | 1   |
| GATCTAGTGAGTTAGAC      | 0                                     | 0   | 0   | 0   | 0   | 0   | 0   | 0   | 0   | 0   | 13  | 0   | 0   | 3   |
| GATCTAGAAAGAGGAGC      | 0                                     | 0   | 0   | 0   | 0   | 0   | 11  | 0   | 0   | 0   | 0   | 0   | 0   | 11  |
| GATCCGATTCTGTCCGC      | 0                                     | 0   | 0   | 0   | 0   | 0   | 2   | 0   | 0   | 0   | 0   | 0   | 0   | 7   |
| GATCGTACCTTTCCTTC      | 0                                     | 0   | 0   | 0   | 0   | 0   | 0   | 0   | 0   | 0   | 0   | 0   | 0   | 4   |
| GATCAGAATCACACGTT      | 0                                     | 0   | 0   | 0   | 0   | 0   | 0   | 0   | 0   | 0   | 0   | 0   | 0   | 9   |
| GATCATATGGACAACAA      | 0                                     | 0   | 0   | 0   | 0   | 2   | 0   | 0   | 0   | 0   | 0   | 0   | 0   | 1   |
| GATCAGGCAACCCACAA      | 0                                     | 0   | 0   | 0   | 0   | 4   | 0   | 0   | 3   | 0   | 0   | 0   | 0   | 9   |
| GATCTATGTCCACAACC      | 0                                     | 0   | 0   | 0   | 0   | 2   | 0   | 0   | 0   | 0   | 0   | 0   | 0   | 7   |
| GATCCCCAAATCCCTGA      | 0                                     | 0   | 0   | 0   | 0   | 2   | 0   | 1   | 0   | 2   | 2   | 0   | 0   | 18  |
| GATCATGTTTTTTTTTC      | 0                                     | 0   | 0   | 0   | 0   | 0   | 0   | 0   | 0   | 0   | 1   | 0   | 0   | 5   |
| GATCCTCTCTAGTTGCC      | 0                                     | 0   | 0   | 0   | 0   | 0   | 0   | 0   | 0   | 0   | 0   | 0   | 0   | 8   |
| GATCGAAGCAGAACAGC      | 0                                     | 0   | 0   | 0   | 0   | 0   | 0   | 0   | 0   | 0   | 6   | 23  | 0   | 11  |







Supplementary Table 3

Supplementary table 3. Transcriptional activity of non-ovule genes in diverse MPSS collections.

| GENE ID <sup>a</sup> | Transcriptional activity <sup>b</sup> |      |     |     |     |      |     |     |     |     |       |     |     |
|----------------------|---------------------------------------|------|-----|-----|-----|------|-----|-----|-----|-----|-------|-----|-----|
|                      | AGM                                   | AP1  | AP3 | CAS | GSE | INS  | LES | ROS | S04 | S52 | SAP   | SIS | OVL |
| At5g67060            | 0                                     | 3    | 2   | 0   | 66  | 4    | 0   | 0   | 20  | 0   | 0     | 0   | 0   |
| At3g50330            | 0                                     | 1    | 0   | 1   | 77  | 5    | 5   | 4   | 0   | 0   | 0     | 0   | 0   |
| At1g20130            | 0                                     | 1518 | 0   | 0   | 0   | 774  | 1   | 0   | 0   | 0   | 1124  | 0   | 0   |
| At3g271025           | 0                                     | 5    | 0   | 0   | 0   | 9    | 0   | 0   | 0   | 0   | 7     | 6   | 0   |
| At5g07550            | 32                                    | 1759 | 0   | 0   | 0   | 9516 | 58  | 0   | 0   | 0   | 11209 | 0   | 0   |
| At2g19070            | 2                                     | 582  | 0   | 0   | 0   | 650  | 0   | 0   | 0   | 0   | 978   | 0   | 0   |
| At1g33430            | 0                                     | 264  | 0   | 0   | 0   | 206  | 0   | 0   | 0   | 0   | 355   | 0   | 0   |
| At1g72290            | 0                                     | 15   | 129 | 0   | 0   | 13   | 0   | 0   | 0   | 0   | 8     | 0   | 0   |

<sup>a</sup> TheArabidopsis Genome Initiative Number.

<sup>b</sup> Activity in transcripts per Million. AGM. *agamous* inflorescence. AP1. *apetala 1-10* inflorescence. AP3. *apetala 3-6* inflorescence. CAS. Callus. GSE. Germinating seedlings. INS. Inflorescences. LES. Leaves. ROS. Roots. S04. Leaves, 4 hr after salicylic acid treatment. S52. Leaves, 52 hr after salicylic acid treatment. SAP. *superman/apetala* inflorescence. SIS. Siliques. OVL. Wild type ovules. SPL. *sporocyteless* ovules.

## Supplementary Table 4

Supplementary table 4. List of MPSS differentially expressed genes between wild-type and *sporocyteless* ovule.

| GENE ID <sup>a</sup> | Transcriptional activity <sup>b</sup> |                  | PREDICTED FUNCTION <sup>c</sup>                                                                                    |
|----------------------|---------------------------------------|------------------|--------------------------------------------------------------------------------------------------------------------|
|                      | Wild type ovule                       | <i>sp/</i> ovule |                                                                                                                    |
| At1g01050            | 39                                    | 0                | AtPPa1 (Arabidopsis thaliana pyrophosphorylase 1                                                                   |
| At1g01060            | 198                                   | 0                | LHY (LATE ELONGATED HYPOCOTYL                                                                                      |
| At1g01360            | 9                                     | 0                | Unknown protein                                                                                                    |
| At1g01490            | 39                                    | 1                | Heavy-metal-associated domain-containing protein                                                                   |
| At1g01920            | 19                                    | 0                | SET domain-containing protein                                                                                      |
| At1g02060            | 18                                    | 0                | Pentatricopeptide (PPR) repeat-containing protein                                                                  |
| At1g02065            | 30                                    | 0                | SPL8 (SQUAMOSA PROMOTER BINDING PROTEIN-LIKE 8)                                                                    |
| At1g02790            | 46                                    | 0                | PGA4 (POLYGALACTURONASE 4); polygalacturonase                                                                      |
| At1g03030            | 23                                    | 0                | Phosphoribulokinase/uridine kinase family protein                                                                  |
| At1g03250            | 38                                    | 0                | Unknown protein                                                                                                    |
| At1g03350            | 36                                    | 0                | BSD domain-containing protein                                                                                      |
| At1g03440            | 12                                    | 0                | Leucine-rich repeat family protein                                                                                 |
| At1g03610            | 43                                    | 0                | Unknown protein                                                                                                    |
| At1g03630            | 9                                     | 0                | POR C (PROTOCHLOROPHYLLIDE OXIDOREDUCTASE)                                                                         |
| At1g04280            | 14                                    | 0                | Unknown protein                                                                                                    |
| At1g04410            | 451                                   | 17               | Malate dehydrogenase, cytosolic, putative                                                                          |
| At1g04510            | 9                                     | 0                | Encodes MAC3A, a U-box proteins with homology to the yeast and human E3 ubiquitin ligase Prp19.                    |
| At1g04830            | 25                                    | 1                | RabGAP/TBC domain-containing protein                                                                               |
| At1g05500            | 54                                    | 0                | NTMC2T2.1                                                                                                          |
| At1g05540            | 79                                    | 0                | Unknown protein                                                                                                    |
| At1g05710            | 137                                   | 0                | Ethylene-responsive protein, putative                                                                              |
| At1g05805            | 18                                    | 0                | Basic helix-loop-helix (bhlh) family protein                                                                       |
| At1g06040            | 48                                    | 0                | STO (SALT TOLERANCE); DNA binding / protein binding/<br>transcription factor/ zinc ion binding                     |
| At1g06070            | 9                                     | 0                | Bzip transcription factor, putative (bzip69)                                                                       |
| At1g06250            | 12                                    | 0                | Lipase class 3 family protein                                                                                      |
| At1g06470            | 24                                    | 0                | Phosphate translocator-related                                                                                     |
| At1g06960            | 89                                    | 3                | Small nuclear ribonucleoprotein U2B, putative / spliceosomal protein,<br>putative                                  |
| At1g07020            | 87                                    | 3                | Unknown protein                                                                                                    |
| At1g07090            | 9                                     | 0                | LSH6 (LIGHT SENSITIVE HYPOCOTYLS 6)                                                                                |
| At1g07180            | 32                                    | 0                | NDA1 (ALTERNATIVE NAD(P)H DEHYDROGENASE 1); NADH<br>dehydrogenase                                                  |
| At1g07530            | 9                                     | 0                | SCL14 (SCARECROW-LIKE 14); transcription factor                                                                    |
| At1g07960            | 17                                    | 0                | ATPDIL5-1 (PDI-like 5-1)                                                                                           |
| At1g08680            | 62                                    | 1                | ZIGA4 (ARF GAP-like zinc finger-containing protein ZiGA4); ARF<br>GTPase activator/ DNA binding / zinc ion binding |
| At1g09080            | 33                                    | 0                | BIP3; ATP binding                                                                                                  |

Supplementary Table 4

| GENE ID <sup>a</sup> | Transcriptional activity <sup>b</sup> |                  | PREDICTED FUNCTION <sup>c</sup>                                                                                                                                                                                             |
|----------------------|---------------------------------------|------------------|-----------------------------------------------------------------------------------------------------------------------------------------------------------------------------------------------------------------------------|
|                      | Wild type ovule                       | <i>sp/ ovule</i> |                                                                                                                                                                                                                             |
| At1g09570            | 11                                    | 0                | PHYA (PHYTOCHROME A); G-protein coupled photoreceptor/ protein histidine kinase/ red or far-red light photoreceptor/ signal transducer                                                                                      |
| At1g09575            | 10                                    | 0                | Unknown protein                                                                                                                                                                                                             |
| At1g09710            | 22                                    | 0                | DNA binding                                                                                                                                                                                                                 |
| At1g10455            | 14                                    | 0                | Unknown protein                                                                                                                                                                                                             |
| At1g10538            | 27                                    | 0                | Pseudogene of CPL4 (phosphoprotein phosphatase)                                                                                                                                                                             |
| At1g10590            | 35                                    | 0                | DNA-binding protein-related                                                                                                                                                                                                 |
| At1g10650            | 9                                     | 0                | Protein binding / zinc ion binding                                                                                                                                                                                          |
| At1g10710            | 19                                    | 0                | Computational predictions suggested the presence of a small cysteine-rich protein beginning in intron 9 (Silverstein 2007), but subsequent analysis revealed that this region contains a tenth exon for the At1g10710 gene. |
| At1g10730            | 14                                    | 0                | Clathrin adaptor complexes medium subunit family protein                                                                                                                                                                    |
| At1g10840            | 12                                    | 0                | TIF3H1; translation initiation factor                                                                                                                                                                                       |
| At1g11200            | 14                                    | 0                | Unknown protein                                                                                                                                                                                                             |
| At1g11260            | 38                                    | 0                | STP1 (SUGAR TRANSPORTER 1); carbohydrate transmembrane transporter/ sugar:hydrogen symporter                                                                                                                                |
| At1g11362            | 14                                    | 0                | Enzyme inhibitor/ pectinesterase                                                                                                                                                                                            |
| At1g11800            | 14                                    | 0                | Endonuclease/exonuclease/phosphatase family protein                                                                                                                                                                         |
| At1g11900            | 9                                     | 0                | Pentatricopeptide (PPR) repeat-containing protein                                                                                                                                                                           |
| At1g12080            | 74                                    | 0                | Unknown protein                                                                                                                                                                                                             |
| At1g12300            | 16                                    | 0                | Pentatricopeptide (PPR) repeat-containing protein                                                                                                                                                                           |
| At1g12310            | 14                                    | 0                | Calmodulin, putative                                                                                                                                                                                                        |
| At1g12400            | 25                                    | 0                | DNA binding                                                                                                                                                                                                                 |
| At1g12610            | 40                                    | 0                | DDF1 (DWARF AND DELAYED FLOWERING 1); DNA binding                                                                                                                                                                           |
| At1g12750            | 14                                    | 0                | ATRBL6 (ARABIDOPSIS RHOMBOID-LIKE PROTEIN 6)                                                                                                                                                                                |
| At1g12775            | 13                                    | 0                | Pentatricopeptide repeat protein (PPR)                                                                                                                                                                                      |
| At1g12820            | 101                                   | 3                | AFB3 (AUXIN SIGNALING F-BOX 3); auxin binding / ubiquitin-protein ligase                                                                                                                                                    |
| At1g13170            | 10                                    | 0                | ORPID (OSBP(OXYSTEROL BINDING PROTEIN)-RELATED PROTEIN 1D); oxysterol binding                                                                                                                                               |
| At1g13210            | 23                                    | 0                | ACA.1 (autoinhibited Ca <sup>2+</sup> /ATPase II); ATPase, coupled to transmembrane movement of ions, phosphorylative mechanism / calmodulin binding                                                                        |
| At1g13450            | 11                                    | 0                | DNA binding protein GT-1                                                                                                                                                                                                    |
| At1g13750            | 30                                    | 0                | Calcineurin-like phosphoesterase family protein                                                                                                                                                                             |
| At1g14200            | 41                                    | 0                | Zinc finger (C3HC4-type RING finger) family protein                                                                                                                                                                         |
| At1g14260            | 19                                    | 0                | Zinc finger (C3HC4-type RING finger) family protein                                                                                                                                                                         |
| At1g14280            | 37                                    | 0                | PKS2 (PHYTOCHROME KINASE SUBSTRATE 2)                                                                                                                                                                                       |
| At1g14530            | 11                                    | 0                | THH1 (TOM THREE HOMOLOG 1); virion binding                                                                                                                                                                                  |
| At1g14650            | 26                                    | 0                | SWAP (Suppressor-of-White-APricot)/surp domain-containing protein / ubiquitin family protein.                                                                                                                               |

Supplementary Table 4

| GENE ID <sup>a</sup> | Transcriptional activity <sup>b</sup> |                  | PREDICTED FUNCTION <sup>c</sup>                                                                                                                                      |
|----------------------|---------------------------------------|------------------|----------------------------------------------------------------------------------------------------------------------------------------------------------------------|
|                      | Wild type ovule                       | <i>sp/</i> ovule |                                                                                                                                                                      |
| At1g15020            | 47                                    | 0                | Thioredoxin family protein                                                                                                                                           |
| At1g15220            | 14                                    | 0                | CCMH; oxidoreductase                                                                                                                                                 |
| At1g15350            | 14                                    | 0                | Unknown protein                                                                                                                                                      |
| At1g15690            | 185                                   | 2                | AVP1; atpase/ hydrogen-translocating pyrophosphatase                                                                                                                 |
| At1g15780            | 64                                    | 0                | Unknown protein                                                                                                                                                      |
| At1g16170            | 10                                    | 0                | Unknown protein                                                                                                                                                      |
| At1g16300            | 11                                    | 0                | GAPCP-2; NAD or NADH binding / binding / catalytic/ glyceraldehyde-3-phosphate dehydrogenase (phosphorylating)/ glyceraldehyde-3-phosphate dehydrogenase             |
| At1g16390            | 11                                    | 0                | ATOCT3 (ARABIDOPSIS THALIANA ORGANIC CATION/CARNITINE TRANSPORTER 3)                                                                                                 |
| At1g16445            | 21                                    | 0                | Methylase-related                                                                                                                                                    |
| At1g16590            | 20                                    | 0                | REV7; DNA binding                                                                                                                                                    |
| At1g16630            | 10                                    | 0                | Unknown protein                                                                                                                                                      |
| At1g17130            | 10                                    | 0                | Cell cycle control protein-related                                                                                                                                   |
| At1g17400            | 22                                    | 0                | Unknown protein                                                                                                                                                      |
| At1g17550            | 88                                    | 1                | HAB2; catalytic/ protein serine/threonine phosphatase                                                                                                                |
| At1g17890            | 43                                    | 1                | GER2; binding / catalytic/ coenzyme binding                                                                                                                          |
| At1g17930            | 16                                    | 0                | Unknown protein                                                                                                                                                      |
| At1g18075            | 43                                    | 0                | MIR159/MIR159B; miRNA                                                                                                                                                |
| At1g18500            | 27                                    | 1                | MAML-4 (METHYLTHIOALKYLMALATE SYNTHASE-LIKE 4); 2-isopropylmalate synthase                                                                                           |
| At1g18610            | 13                                    | 0                | Galactose oxidase/kelch repeat superfamily protein                                                                                                                   |
| At1g18840            | 19                                    | 0                | IQD30; calmodulin binding                                                                                                                                            |
| At1g19350            | 14                                    | 0                | BES1 (BRI1-EMS-SUPPRESSOR 1); protein binding / transcription factor/ transcription regulator                                                                        |
| At1g19450            | 13                                    | 0                | Integral membrane protein, putative / sugar transporter family protein                                                                                               |
| At1g19690            | 73                                    | 0                | Binding / catalytic/ coenzyme binding                                                                                                                                |
| At1g19790            | 15                                    | 0                | Srs7 (shi-related sequence 7)                                                                                                                                        |
| At1g19990            | 63                                    | 0                | Unknown protein                                                                                                                                                      |
| At1g20000            | 11                                    | 0                | TAF11b (TBP-ASSOCIATED FACTOR 11b); DNA binding / RNA polymerase II transcription factor/ transcription initiation factor                                            |
| At1g20140            | 33                                    | 0                | ASK4 (ARABIDOPSIS SKP1-LIKE 4); protein binding / ubiquitin-protein ligase                                                                                           |
| At1g20220            | 14                                    | 0                | Nucleic acid binding                                                                                                                                                 |
| At1g20830            | 9                                     | 0                | Unknown protein                                                                                                                                                      |
| At1g21080            | 20                                    | 0                | DNAJ heat shock N-terminal domain-containing protein                                                                                                                 |
| At1g21390            | 18                                    | 0                | Emb2170 (embryo defective 2170)                                                                                                                                      |
| At1g21400            | 21                                    | 0                | 2-oxoisovalerate dehydrogenase, putative / 3-methyl-2-oxobutanoate dehydrogenase, putative / branched-chain alpha-keto acid dehydrogenase E1 alpha subunit, putative |
| At1g21460            | 28                                    | 0                | Nodulin mtn3 family protein                                                                                                                                          |

Supplementary Table 4

| GENE ID <sup>a</sup> | Transcriptional activity <sup>b</sup> |                  | PREDICTED FUNCTION <sup>c</sup>                                                                                            |
|----------------------|---------------------------------------|------------------|----------------------------------------------------------------------------------------------------------------------------|
|                      | Wild type ovule                       | <i>sp/ ovule</i> |                                                                                                                            |
| At1g21700            | 15                                    | 0                | ATSWI3C (SWITCH/SUCROSE NONFERMENTING 3C); DNA binding                                                                     |
| At1g22140            | 79                                    | 2                | Unknown protein                                                                                                            |
| At1g22275            | 12                                    | 0                | ZYP1b                                                                                                                      |
| At1g22970            | 21                                    | 0                | Unknown protein                                                                                                            |
| At1g23350            | 18                                    | 0                | Invertase/pectin methylesterase inhibitor family protein                                                                   |
| At1g23550            | 37                                    | 0                | SRO2 (SIMILAR TO RCD ONE 2); NAD <sup>+</sup> ADP-ribosyltransferase                                                       |
| At1g23790            | 43                                    | 1                | Unknown protein                                                                                                            |
| At1g23960            | 132                                   | 3                | Unknown protein                                                                                                            |
| At1g24070            | 22                                    | 0                | ATCSLA10; cellulose synthase/ transferase, transferring glycosyl groups                                                    |
| At1g24120            | 39                                    | 1                | ARL1 (ARG1-LIKE 1); heat shock protein binding / unfolded protein binding                                                  |
| At1g24160            | 10                                    | 0                | Unknown protein                                                                                                            |
| At1g24490            | 9                                     | 0                | ALB4 (ALBINA 4)                                                                                                            |
| At1g25490            | 11                                    | 0                | RCN1 (ROOTS CURL IN NPA); protein phosphatase type 2A regulator                                                            |
| At1g26480            | 30                                    | 1                | GRF12 (GENERAL REGULATORY FACTOR 12); protein binding / protein phosphorylated amino acid binding                          |
| At1g26610            | 21                                    | 0                | Zinc finger (C2H2 type) family protein                                                                                     |
| At1g26620            | 15                                    | 0                | Unknown protein                                                                                                            |
| At1g26795            | 97                                    | 0                | Self-incompatibility protein-related                                                                                       |
| At1g27030            | 16                                    | 0                | Unknown protein                                                                                                            |
| At1g27390            | 54                                    | 1                | TOM20-2 (TRANSLOCASE OUTER MEMBRANE 20-2); P-P-bond-hydrolysis-driven protein transmembrane transporter/ metal ion binding |
| At1g27520            | 18                                    | 0                | Glycoside hydrolase family 47 protein                                                                                      |
| At1g27530            | 77                                    | 3                | Unknown function                                                                                                           |
| At1g28330            | 802                                   | 29               | DYL1 (DORMANCY-ASSOCIATED PROTEIN-LIKE 1)                                                                                  |
| At1g28440            | 51                                    | 0                | HSL1 (HAESA-Like 1); ATP binding / kinase/ protein serine/threonine kinase                                                 |
| At1g28760            | 11                                    | 0                | Unknown protein                                                                                                            |
| At1g29060            | 21                                    | 0                | Target SNARE coiled-coil domain protein                                                                                    |
| At1g29140            | 23                                    | 0                | Pollen Ole e 1 allergen and extensin family protein                                                                        |
| At1g29260            | 37                                    | 1                | PEX7; peroxisome matrix targeting signal-2 binding / protein binding                                                       |
| At1g29330            | 15                                    | 0                | ERD2 (ENDOPLASMIC RETICULUM RETENTION DEFECTIVE 2); KDEL sequence binding / receptor                                       |
| At1g29357            | 26                                    | 1                | other RNA                                                                                                                  |
| At1g30440            | 9                                     | 0                | Phototropic-responsive NPH3 family protein                                                                                 |
| At1g30970            | 16                                    | 0                | SUF4 (suppressor of FRIGIDA4/ transcription factor                                                                         |
| At1g31330            | 210                                   | 2                | PSAF (photosystem I subunit F)                                                                                             |
| At1g31660            | 9                                     | 0                | Unknown function.                                                                                                          |
| At1g31760            | 129                                   | 3                | SWIB complex BAF60b domain-containing protein                                                                              |

Supplementary Table 4

| GENE ID <sup>a</sup> | Transcriptional activity <sup>b</sup> |                  | PREDICTED FUNCTION <sup>c</sup>                                                                             |
|----------------------|---------------------------------------|------------------|-------------------------------------------------------------------------------------------------------------|
|                      | Wild type ovule                       | <i>sp/</i> ovule |                                                                                                             |
| At1g31810            | 24                                    | 0                | Actin binding                                                                                               |
| At1g32120            | 14                                    | 0                | Unknown protein                                                                                             |
| At1g32300            | 11                                    | 0                | FAD-binding domain-containing protein                                                                       |
| At1g32310            | 32                                    | 0                | Unknown protein                                                                                             |
| At1g32390            | 21                                    | 0                | Transposable element gene                                                                                   |
| At1g32460            | 15                                    | 0                | Unknown protein                                                                                             |
| At1g32470            | 19                                    | 0                | Glycine cleavage system H protein, mitochondrial, putative                                                  |
| At1g33230            | 14                                    | 0                | TMPIT-like protein                                                                                          |
| At1g33360            | 31                                    | 0                | ATP-dependent Clp protease ATP-binding subunit ClpX, putative                                               |
| At1g33970            | 22                                    | 0                | Avirulence-responsive protein, putative / avirulence induced gene protein, putative / AIG protein, putative |
| At1g34210            | 25                                    | 0                | SERK2 (SOMATIC EMBRYOGENESIS RECEPTOR-LIKE KINASE 2); kinase                                                |
| At1g34380            | 19                                    | 0                | 5'-3' exonuclease family protein                                                                            |
| At1g34550            | 12                                    | 0                | EMB2756 (EMBRYO DEFECTIVE 2756)                                                                             |
| At1g35180            | 11                                    | 0                | TRAM, LAG1 and CLN8 (TLC) lipid-sensing domain containing protein                                           |
| At1g43886            | 35                                    | 1                | Transposable element gene                                                                                   |
| At1g44900            | 61                                    | 0                | ATP binding / DNA binding / DNA-dependent ATPase                                                            |
| At1g45000            | 53                                    | 0                | 26S proteasome regulatory complex subunit p42D, putative                                                    |
| At1g45180            | 11                                    | 0                | Zinc finger (C3HC4-type RING finger) family protein                                                         |
| At1g46264            | 69                                    | 1                | AT-HSFB4; DNA binding / transcription factor                                                                |
| At1g47128            | 107                                   | 1                | RD21 (responsive to dehydration 21); cysteine-type endopeptidase/ cysteine-type peptidase                   |
| At1g47240            | 14                                    | 0                | NRAMP2; inorganic anion transmembrane transporter/ metal ion transmembrane transporter                      |
| At1g47450            | 26                                    | 0                | Unknown protein                                                                                             |
| At1g47470            | 21                                    | 0                | Unknown protein                                                                                             |
| At1g47670            | 63                                    | 0                | Amino acid transporter family protein                                                                       |
| At1g47780            | 53                                    | 0                | Acyl-protein thioesterase-related                                                                           |
| At1g47830            | 30                                    | 1                | Clathrin coat assembly protein, putative                                                                    |
| At1g47930            | 15                                    | 0                | pseudogene, glutamyl-tRNA synthetase, similar to GI:3435196 from ( <i>Arabidopsis thaliana</i> )            |
| At1g48460            | 29                                    | 0                | Unknown protein                                                                                             |
| At1g48560            | 15                                    | 0                | Unknown protein                                                                                             |
| At1g48600            | 19                                    | 0                | Phosphoethanolamine N-methyltransferase 2, putative (NMT2)                                                  |
| At1g48900            | 54                                    | 0                | Signal recognition particle 54 kDa protein 3 / SRP54 (SRP-54C)                                              |
| At1g48950            | 26                                    | 1                | Zinc ion binding                                                                                            |
| At1g49650            | 19                                    | 0                | Cell death associated protein-related                                                                       |
| At1g49920            | 46                                    | 0                | Zinc finger protein-related                                                                                 |
| At1g50000            | 30                                    | 0                | Methyltransferase                                                                                           |
| At1g50010            | 9                                     | 0                | TUA2; structural constituent of cytoskeleton                                                                |

Supplementary Table 4

| GENE ID <sup>a</sup> | Transcriptional activity <sup>b</sup> |                  | PREDICTED FUNCTION <sup>c</sup>                                            |
|----------------------|---------------------------------------|------------------|----------------------------------------------------------------------------|
|                      | Wild type ovule                       | <i>sp/ ovule</i> |                                                                            |
| At1g50250            | 54                                    | 0                | FTSH1 (FtsH protease 1); ATP-dependent peptidase/ ATPase/ metallopeptidase |
| At1g50440            | 14                                    | 0                | Zinc finger (C3HC4-type RING finger) family protein                        |
| At1g50500            | 14                                    | 0                | HIT1 (HEAT-INTOLERANT 1); transporter                                      |
| At1g50510            | 10                                    | 0                | Indigoidine synthase A family protein                                      |
| At1g51100            | 27                                    | 0                | Unknown protein                                                            |
| At1g51440            | 13                                    | 0                | Lipase class 3 family protein                                              |
| At1g51550            | 10                                    | 0                | F-box family protein                                                       |
| At1g51570            | 83                                    | 2                | C2 domain-containing protein                                               |
| At1g52190            | 39                                    | 0                | Proton-dependent oligopeptide transport (POT) family protein               |
| At1g52220            | 137                                   | 2                | Unknown function                                                           |
| At1g52250            | 9                                     | 0                | Dynein light chain type 1 family protein                                   |
| At1g52347            | 16                                    | 0                | Unknown gene                                                               |
| At1g52590            | 12                                    | 0                | Putative thiol-disulphide oxidoreductase                                   |
| At1g52730            | 17                                    | 0                | Transducin family protein / WD-40 repeat family protein                    |
| At1g53120            | 34                                    | 1                | RNA-binding S4 domain-containing protein                                   |
| At1g53170            | 13                                    | 0                | ERF8; DNA binding / transcription factor/ transcription repressor          |
| At1g53300            | 30                                    | 0                | TTL1 (TETRATRICOPETIDE-REPEAT THIOREDOXIN-LIKE 1); binding                 |
| At1g53440            | 74                                    | 2                | Leucine-rich repeat family protein / protein kinase family protein         |
| At1g53645            | 38                                    | 0                | Hydroxyproline-rich glycoprotein family protein                            |
| At1g53760            | 14                                    | 0                | Unknown protein                                                            |
| At1g54260            | 76                                    | 3                | Histone H1/H5 family protein                                               |
| At1g54570            | 11                                    | 0                | Esterase/lipase/thioesterase family protein                                |
| At1g54580            | 477                                   | 0                | ACP2 (ACYL CARRIER PROTEIN 2); acyl carrier                                |
| At1g54630            | 10                                    | 0                | ACP3 (ACYL CARRIER PROTEIN 3); acyl carrier                                |
| At1g54830            | 13                                    | 0                | NF-YC3 (NUCLEAR FACTOR Y, SUBUNIT C3); DNA binding / transcription factor  |
| At1g54850            | 19                                    | 0                | HSP20-like chaperones superfamily protein                                  |
| At1g55170            | 10                                    | 0                | Unknown protein                                                            |
| At1g55260            | 43                                    | 1                | Lipid binding                                                              |
| At1g55680            | 69                                    | 0                | WD-40 repeat family protein                                                |
| At1g55810            | 58                                    | 1                | Uracil phosphoribosyltransferase, putative                                 |
| At1g55820            | 9                                     | 0                | Protein of Unknown function DUF1296                                        |
| At1g56020            | 19                                    | 0                | Unknown protein                                                            |
| At1g56180            | 39                                    | 0                | Unknown protein                                                            |
| At1g56450            | 35                                    | 0                | 20S proteasome beta subunit PBG1 (PBG1)                                    |
| At1g56610            | 9                                     | 0                | Syntaxin-related family protein                                            |
| At1g57590            | 11                                    | 0                | Carboxylesterase                                                           |
| At1g58220            | 18                                    | 0                | Myb family transcription factor                                            |



Supplementary Table 4

| GENE ID <sup>a</sup> | Transcriptional activity <sup>b</sup> |                 | PREDICTED FUNCTION <sup>c</sup>                                                              |
|----------------------|---------------------------------------|-----------------|----------------------------------------------------------------------------------------------|
|                      | Wild type ovule                       | <i>sp/ovule</i> |                                                                                              |
| At1g58227            | 9                                     | 0               | Binding                                                                                      |
| At1g58250            | 19                                    | 0               | SABRE, putative gene of Unknown function, homologous to maize <i>apt1</i> gene.              |
| At1g58520            | 12                                    | 0               | Hydrolase, acting on ester bonds / lipase                                                    |
| At1g59520            | 18                                    | 0               | Encodes CW7                                                                                  |
| At1g60000            | 12                                    | 0               | 29 kDa ribonucleoprotein, chloroplast, putative / RNA-binding protein <i>cp29</i> , putative |
| At1g60160            | 13                                    | 0               | Potassium transporter family protein                                                         |
| At1g60650            | 14                                    | 0               | Glycine-rich RNA-binding protein, putative                                                   |
| At1g60740            | 33                                    | 1               | Peroxiredoxin type 2, putative                                                               |
| At1g60860            | 47                                    | 0               | AGD2 (ARF-GAP DOMAIN 2); ARF GTPase activator/ protein binding / zinc ion binding            |
| At1g60940            | 84                                    | 1               | SNRK2.10 (SNF1-RELATED PROTEIN KINASE 2.10); kinase                                          |
| At1g60960            | 34                                    | 1               | IRT3; cation transmembrane transporter/ metal ion transmembrane transporter                  |
| At1g60970            | 13                                    | 0               | Clathrin adaptor complex small chain family protein                                          |
| At1g60990            | 15                                    | 0               | Aminomethyltransferase                                                                       |
| At1g61665            | 11                                    | 0               | Pseudogene, similar to serine/threonine kinase,                                              |
| At1g61790            | 183                                   | 3               | OST3/OST6 family protein                                                                     |
| At1g62130            | 9                                     | 0               | AAA-type ATPase family protein                                                               |
| At1g62520            | 25                                    | 1               | Unknown protein                                                                              |
| At1g62730            | 12                                    | 0               | Transferase                                                                                  |
| At1g62860            | 27                                    | 0               | Pseudogene of pentatricopeptide (PPR) repeat-containing protein                              |
| At1g63130            | 24                                    | 0               | Pentatricopeptide (PPR) repeat-containing protein                                            |
| At1g63220            | 116                                   | 4               | C2 domain-containing protein                                                                 |
| At1g63490            | 30                                    | 1               | Transcription factor jumonji (jmc) domain-containing protein                                 |
| At1g63500            | 26                                    | 0               | ATP binding.                                                                                 |
| At1g64050            | 21                                    | 0               | Unknown protein                                                                              |
| At1g64230            | 32                                    | 1               | Ubiquitin-conjugating enzyme, putative                                                       |
| At1g64280            | 17                                    | 0               | NPR1 (NONEXPRESSER OF PR GENES 1); protein binding / transcription activator                 |
| At1g64520            | 72                                    | 1               | RPN12a (Regulatory Particle non-ATPase 12a); peptidase                                       |
| At1g64740            | 33                                    | 0               | TUA1 (ALPHA-1 TUBULIN); structural constituent of cytoskeleton                               |
| At1g65240            | 46                                    | 1               | Aspartyl protease family protein                                                             |
| At1g66150            | 25                                    | 0               | TMK1 (TRANSMEMBRANE KINASE 1); transmembrane receptor protein serine/threonine kinase        |
| At1g66660            | 20                                    | 0               | Seven in absentia (SINA) protein, putative                                                   |
| At1g67325            | 15                                    | 0               | Binding / zinc ion binding                                                                   |
| At1g67570            | 30                                    | 0               | UUnknown protein                                                                             |
| At1g67650            | 12                                    | 0               | 7S RNA binding                                                                               |
| At1g67660            | 9                                     | 0               | DNA binding / nuclease                                                                       |
| At1g67750            | 43                                    | 0               | Pectate lyase family protein                                                                 |

Supplementary Table 4

| GENE ID <sup>a</sup> | Transcriptional activity <sup>b</sup> |                  | PREDICTED FUNCTION <sup>c</sup>                                                                                                   |
|----------------------|---------------------------------------|------------------|-----------------------------------------------------------------------------------------------------------------------------------|
|                      | Wild type ovule                       | <i>sp/ ovule</i> |                                                                                                                                   |
| At1g68020            | 11                                    | 0                | ATTPS6; alpha,alpha-trehalose-phosphate synthase (UDP-forming)/ transferase, transferring glycosyl groups / trehalose-phosphatase |
| At1g68440            | 17                                    | 0                | Unknown protein                                                                                                                   |
| At1g69230            | 19                                    | 0                | SP1L2 (SPIRAL1-LIKE2)                                                                                                             |
| At1g69400            | 25                                    | 0                | Transducin family protein / WD-40 repeat family protein                                                                           |
| At1g69850            | 11                                    | 0                | ATNRT1:2 (ARABIDOPSIS THALIANA NITRATE TRANSPORTER 1:2); calcium ion binding / transporter                                        |
| At1g70100            | 22                                    | 0                | Unknown protein                                                                                                                   |
| At1g70250            | 21                                    | 0                | Receptor serine/threonine kinase, putative                                                                                        |
| At1g70280            | 16                                    | 0                | NHL repeat-containing protein                                                                                                     |
| At1g70500            | 34                                    | 1                | Polygalacturonase, putative / pectinase, putative                                                                                 |
| At1g70560            | 52                                    | 0                | TAA1 (TRYPTOPHAN AMINOTRANSFERASE OF ARABIDOPSIS 1)                                                                               |
| At1g70660            | 75                                    | 3                | MMZ2 (MMS ZWEI HOMOLOGE 2);ubiquitin-protein ligase                                                                               |
| At1g71030            | 20                                    | 0                | MYBL2 (ARABIDOPSIS MYB-LIKE 2); DNA binding / transcription factor                                                                |
| At1g71260            | 68                                    | 1                | ATWHY2 (A. THALIANA WHIRLY 2); DNA binding                                                                                        |
| At1g71310            | 22                                    | 0                | Unknown protein                                                                                                                   |
| At1g71380            | 14                                    | 0                | ATCEL3 (ARABIDOPSIS THALIANA CELLULASE 3); catalytic/ hydrolase, hydrolyzing O-glycosyl compounds                                 |
| At1g71430            | 17                                    | 0                | Unknown protein                                                                                                                   |
| At1g71730            | 14                                    | 0                | Unknown protein                                                                                                                   |
| At1g71750            | 34                                    | 0                | Phosphoribosyltransferase family protein                                                                                          |
| At1g72300            | 25                                    | 0                | Leucine-rich repeat transmembrane protein kinase, putative                                                                        |
| At1g72550            | 35                                    | 0                | tRNA synthetase beta subunit family protein                                                                                       |
| At1g72880            | 16                                    | 0                | Acid phosphatase survival protein sure, putative                                                                                  |
| At1g73450            | 9                                     | 0                | Protein kinase, putative                                                                                                          |
| At1g73885            | 20                                    | 0                | Unknown protein                                                                                                                   |
| At1g73910            | 17                                    | 0                | ATARP4A (Actin-related proteins 4A); protein binding / structural constituent of cytoskeleton                                     |
| At1g74180            | 27                                    | 0                | AtRLP14 (Receptor Like Protein 14); protein binding                                                                               |
| At1g74390            | 56                                    | 1                | Exonuclease family protein                                                                                                        |
| At1g74700            | 21                                    | 0                | TRZ1 (TRNASE Z 1); 3'-tRNA processing endoribonuclease                                                                            |
| At1g74840            | 72                                    | 0                | Myb family transcription factor                                                                                                   |
| At1g75020            | 60                                    | 1                | LPAT4 (LYSOPHOSPHATIDYL ACYLTRANSFERASE 4); acyltransferase                                                                       |
| At1g75150            | 11                                    | 0                | Unknown protein                                                                                                                   |
| At1g75780            | 27                                    | 1                | TUB1; GTP binding / GTPase/ structural molecule                                                                                   |
| At1g75840            | 45                                    | 1                | ARAC5 (RAC-LIKE GTP BINDING PROTEIN 5); GTP binding / GTPase                                                                      |
| At1g75980            | 41                                    | 0                | Single hybrid motif superfamily protein                                                                                           |
| At1g76100            | 50                                    | 0                | PETE1 (PLASTOCYANIN 1); copper ion binding / electron carrier                                                                     |
| At1g76130            | 24                                    | 0                | AMY2 (ALPHA-AMYLASE-LIKE 2); alpha-amylase/ calcium ion                                                                           |

Supplementary Table 4

binding / catalytic/ cation binding

| GENE ID <sup>a</sup> | Transcriptional activity <sup>b</sup> |                  | PREDICTED FUNCTION <sup>c</sup>                                                                                                      |
|----------------------|---------------------------------------|------------------|--------------------------------------------------------------------------------------------------------------------------------------|
|                      | Wild type ovule                       | <i>sp/ ovule</i> |                                                                                                                                      |
| At1g76185            | 14                                    | 0                | Unknown protein                                                                                                                      |
| At1g76600            | 18                                    | 0                | Unknown protein                                                                                                                      |
| At1g76830            | 13                                    | 0                | F-box family protein                                                                                                                 |
| At1g77380            | 9                                     | 0                | AAP3; amino acid transmembrane transporter                                                                                           |
| At1g77720            | 10                                    | 0                | Protein kinase family protein                                                                                                        |
| At1g77760            | 33                                    | 0                | NIA1 (NITRATE REDUCTASE 1); nitrate reductase                                                                                        |
| At1g78560            | 18                                    | 0                | Bile acid:sodium symporter family protein                                                                                            |
| At1g79070            | 33                                    | 1                | SNARE-associated protein-related                                                                                                     |
| At1g79410            | 15                                    | 0                | AtOCT5 (Arabidopsis thaliana ORGANIC CATION/CARNITINE TRANSPORTER5); carbohydrate transmembrane transporter/sugar:hydrogen symporter |
| At1g79690            | 31                                    | 1                | atnudt3 (Arabidopsis thaliana Nudix hydrolase homolog 3); hydrolase                                                                  |
| At1g79710            | 17                                    | 0                | Integral membrane transporter family protein                                                                                         |
| At1g79810            | 29                                    | 1                | TED3 (REVERSAL OF THE DET PHENOTYPE 3); protein binding / zinc ion binding                                                           |
| At1g80370            | 31                                    | 1                | CYCA2;4 (Cyclin A2;4); cyclin-dependent protein kinase regulator                                                                     |
| At1g80460            | 45                                    | 0                | NHO1 (nonhost resistance to P. s. phaseolicola 1); carbohydrate kinase/ glycerol kinase                                              |
| At1g80490            | 28                                    | 0                | TPR1 (TOPLESS-RELATED 1)                                                                                                             |
| At1g80620            | 21                                    | 0                | Ribosomal protein S15 family protein                                                                                                 |
| At1g80690            | 10                                    | 0                | Unknown protein                                                                                                                      |
| At2g01400            | 27                                    | 0                | Unknown protein                                                                                                                      |
| At2g01490            | 46                                    | 1                | Phytanoyl-coa dioxygenase (phyh) family protein                                                                                      |
| At2g01830            | 13                                    | 0                | WOL (WOODEN LEG); cytokinin receptor/ osmosensor/ phosphoprotein phosphatase/ protein histidine kinase                               |
| At2g02090            | 27                                    | 0                | ETL1; ATP binding / DNA binding / helicase/ nucleic acid binding                                                                     |
| At2g02400            | 41                                    | 0                | cinnamoyl-CoA reductase family                                                                                                       |
| At2g02740            | 27                                    | 0                | WHY3 (WHIRLY 3); DNA binding                                                                                                         |
| At2g02910            | 100                                   | 3                | Protein of Unknown function DUF616 .                                                                                                 |
| At2g03270            | 9                                     | 0                | DNA-binding protein, putative                                                                                                        |
| At2g03420            | 12                                    | 0                | Unknown protein                                                                                                                      |
| At2g03550            | 38                                    | 0                | Hydrolase                                                                                                                            |
| At2g03810            | 72                                    | 1                | 18S pre-ribosomal assembly protein gar2-related                                                                                      |
| At2g03840            | 24                                    | 0                | TET13 (TETRASPANIN13)                                                                                                                |
| At2g04037            | 30                                    | 1                | Unknown protein                                                                                                                      |
| At2g04039            | 12                                    | 0                | Unknown protein                                                                                                                      |
| At2g04235            | 21                                    | 0                | Unknown protein                                                                                                                      |
| At2g04280            | 19                                    | 0                | Unknown protein                                                                                                                      |
| At2g06090            | 13                                    | 0                | Self-incompatibility protein-related                                                                                                 |
| At2g09800            | 15                                    | 0                | Transposable element gene                                                                                                            |
| At2g10340            | 14                                    | 0                | Unknown protein                                                                                                                      |

Supplementary Table 4

| GENE ID <sup>a</sup> | Transcriptional activity <sup>b</sup> |                  | PREDICTED FUNCTION <sup>c</sup>                                                                                                                                       |
|----------------------|---------------------------------------|------------------|-----------------------------------------------------------------------------------------------------------------------------------------------------------------------|
|                      | Wild type ovule                       | <i>sp/ ovule</i> |                                                                                                                                                                       |
| At2g10405            | 12                                    | 0                | Transposable element gene                                                                                                                                             |
| At2g11140            | 41                                    | 1                | Transposable element gene                                                                                                                                             |
| At2g12462            | 19                                    | 0                | Unknown protein                                                                                                                                                       |
| At2g13360            | 12                                    | 0                | AGT (ALANINE:GLYOXYLATE AMINOTRANSFERASE);                                                                                                                            |
| At2g13610            | 26                                    | 0                | ABC transporter family protein                                                                                                                                        |
| At2g13960            | 16                                    | 0                | Myb family transcription factor                                                                                                                                       |
| At2g14120            | 49                                    | 1                | Dynamamin-like protein 2b (ADL2b)                                                                                                                                     |
| At2g14170            | 73                                    | 0                | ALDH6B2; 3-chloroallyl aldehyde dehydrogenase/ methylmalonate-semialdehyde dehydrogenase (acylating)/ oxidoreductase                                                  |
| At2g14255            | 42                                    | 0                | Zinc ion binding                                                                                                                                                      |
| At2g14560            | 12                                    | 0                | LURP1 (LATE UPREGULATED IN RESPONSE TO HYALOPERONOSPORA PARASITICA)                                                                                                   |
| At2g15440            | 15                                    | 0                | Unknown protein                                                                                                                                                       |
| At2g15695            | 69                                    | 2                | Unknown protein                                                                                                                                                       |
| At2g15960            | 22                                    | 0                | Unknown protein                                                                                                                                                       |
| At2g16050            | 18                                    | 0                | Cysteine/Histidine-rich C1 domain family protein                                                                                                                      |
| At2g16370            | 106                                   | 2                | THY-1 (THYMIDYLATE SYNTHASE 1); dihydrofolate reductase/thymidylate synthase                                                                                          |
| At2g16400            | 16                                    | 0                | BLH7 (bell1-like homeodomain 7); DNA binding / transcription factor                                                                                                   |
| At2g16570            | 9                                     | 0                | ATASE1 (GLN PHOSPHORIBOSYL PYROPHOSPHATE AMIDOTRANSFERASE 1); amidophosphoribosyltransferase                                                                          |
| At2g16800            | 14                                    | 0                | High-affinity nickel-transport family protein                                                                                                                         |
| At2g17130            | 11                                    | 0                | IDH2 (ISOCITRATE DEHYDROGENASE SUBUNIT 2); isocitrate dehydrogenase (NAD <sup>+</sup> )/ oxidoreductase, acting on the CH-OH group of donors, NAD or NADP as acceptor |
| At2g17210            | 15                                    | 0                | Pentatricopeptide (PPR) repeat-containing protein                                                                                                                     |
| At2g17390            | 14                                    | 0                | AKR2B (ANKYRIN REPEAT-CONTAINING 2B); protein binding / transcription regulator                                                                                       |
| At2g17420            | 29                                    | 1                | NTRA (NADPH-DEPENDENT THIOREDOXIN REDUCTASE A); thioredoxin-disulfide reductase                                                                                       |
| At2g17530            | 53                                    | 0                | Protein kinase family protein                                                                                                                                         |
| At2g17570            | 31                                    | 0                | Undecaprenyl pyrophosphate synthetase family protein / UPP synthetase family protein                                                                                  |
| At2g18040            | 33                                    | 0                | PIN1AT (PEPTIDYLPROLYL CIS/TRANS ISOMERASE, NIMA-INTERACTING 1); peptidyl-prolyl cis-trans isomerase                                                                  |
| At2g18330            | 28                                    | 1                | AAA-type ATPase family protein                                                                                                                                        |
| At2g18700            | 65                                    | 2                | ATTPS11; transferase, transferring glycosyl groups                                                                                                                    |
| At2g18890            | 11                                    | 0                | Protein kinase family protein                                                                                                                                         |
| At2g19340            | 75                                    | 3                | Membrane protein, putative                                                                                                                                            |
| At2g19660            | 15                                    | 0                | DC1 domain-containing protein                                                                                                                                         |
| At2g19760            | 24                                    | 0                | PRF1 (PROFILIN 1); actin binding                                                                                                                                      |
| At2g20050            | 22                                    | 0                | ATP binding / cAMP-dependent protein kinase regulator/ catalytic/protein kinase/ protein serine/threonine phosphatase                                                 |
| At2g20690            | 19                                    | 0                | Lumazine-binding family protein                                                                                                                                       |
| At2g20790            | 73                                    | 0                | Protein binding                                                                                                                                                       |

Supplementary Table 4

| GENE ID <sup>a</sup> | Transcriptional activity <sup>b</sup> |                  | PREDICTED FUNCTION <sup>c</sup>                                                                  |
|----------------------|---------------------------------------|------------------|--------------------------------------------------------------------------------------------------|
|                      | Wild type ovule                       | <i>sp/ ovule</i> |                                                                                                  |
| At2g20800            | 32                                    | 0                | NDB4 (NAD(P)H dehydrogenase B4); NADH dehydrogenase                                              |
| At2g20960            | 11                                    | 0                | pEARLI4                                                                                          |
| At2g21120            | 24                                    | 0                | Unknown protein                                                                                  |
| At2g21250            | 73                                    | 0                | Mannose 6-phosphate reductase (NADPH-dependent), putative                                        |
| At2g21440            | 27                                    | 0                | RNA recognition motif (RRM)-containing protein                                                   |
| At2g21540            | 11                                    | 0                | SFH3 (SEC14-LIKE 3); phosphatidylinositol transporter                                            |
| At2g21580            | 41                                    | 0                | 40S ribosomal protein S25 (RPS25B)                                                               |
| At2g21655            | 35                                    | 0                | Unknown protein                                                                                  |
| At2g22120            | 18                                    | 0                | Protein binding / zinc ion binding                                                               |
| At2g22170            | 27                                    | 0                | Lipid-associated family protein                                                                  |
| At2g22240            | 51                                    | 0                | MIPS2 (MYO-INOSITOL-1-PHOSPHATE SYNTHASE 2); binding / catalytic/ inositol-3-phosphate synthase  |
| At2g22310            | 13                                    | 0                | ATUBP4 (ARABIDOPSIS THALIANA UBIQUITIN-SPECIFIC PROTEASE 4); ubiquitin-specific protease         |
| At2g22490            | 14                                    | 0                | CYCD2;1 (Cyclin D2;1); cyclin-dependent protein kinase regulator/ protein binding                |
| At2g22540            | 20                                    | 0                | SVP (SHORT VEGETATIVE PHASE); transcription factor/ translation repressor, nucleic acid binding  |
| At2g22650            | 24                                    | 0                | FAD-dependent oxidoreductase family protein                                                      |
| At2g22940            | 15                                    | 0                | BEST Arabidopsis thaliana protein match is: zinc finger (C3HC4-type RING finger)                 |
| At2g23040            | 9                                     | 0                | Unknown protein                                                                                  |
| At2g23142            | 19                                    | 0                | Plant self-incompatibility protein S1 family                                                     |
| At2g23310            | 17                                    | 0                | ATRER1C1                                                                                         |
| At2g23340            | 15                                    | 0                | AP2 domain-containing transcription factor, putative                                             |
| At2g23460            | 40                                    | 0                | XLG1 (EXTRA-LARGE G-PROTEIN 1); guanyl nucleotide binding / signal transducer                    |
| At2g23530            | 18                                    | 0                | Zinc-finger domain of monoamine-oxidase A repressor R1                                           |
| At2g24205            | 13                                    | 0                | Encodes a ECA1 gametogenesis related family protein                                              |
| At2g24270            | 113                                   | 0                | ALDH11A3; 3-chloroallyl aldehyde dehydrogenase/ glyceraldehyde-3-phosphate dehydrogenase (NADP+) |
| At2g24360            | 15                                    | 0                | Serine/threonine/tyrosine kinase, putative                                                       |
| At2g24450            | 30                                    | 0                | FLA3 (FASCICLIN-LIKE ARABINOGALACTAN PROTEIN 3 PRECURSOR)                                        |
| At2g24830            | 11                                    | 0                | Zinc finger (CCCH-type) family protein / D111/G-patch domain-containing protein                  |
| At2g25010            | 59                                    | 0                | Unknown protein                                                                                  |
| At2g25300            | 50                                    | 0                | Transferase, transferring glycosyl groups / transferase, transferring hexosyl groups             |
| At2g25320            | 18                                    | 0                | TRAF-like family protein                                                                         |
| At2g25590            | 70                                    | 2                | Agenet domain-containing protein                                                                 |
| At2g26360            | 26                                    | 0                | Mitochondrial substrate carrier family protein                                                   |
| At2g26450            | 10                                    | 0                | Pectinesterase family protein                                                                    |
| At2g26920            | 26                                    | 0                | Ubiquitin-associated (UBA)/TS-N domain-containing protein                                        |
| At2g26970            | 16                                    | 0                | Exonuclease family protein                                                                       |

Supplementary Table 4

| GENE ID <sup>a</sup> | Transcriptional activity <sup>b</sup> |                  | PREDICTED FUNCTION <sup>c</sup>                                                                                         |
|----------------------|---------------------------------------|------------------|-------------------------------------------------------------------------------------------------------------------------|
|                      | Wild type ovule                       | <i>sp/ ovule</i> |                                                                                                                         |
| At2g25650            | 109                                   | 2                | NA-binding storekeeper protein-related                                                                                  |
| At2g26080            | 66                                    | 0                | AtGLDP2 (Arabidopsis thaliana glycine decarboxylase P-protein 2); ATP binding / glycine dehydrogenase (decarboxylating) |
| At2g27500            | 15                                    | 0                | Glycosyl hydrolase family 17 protein                                                                                    |
| At2g27900            | 31                                    | 0                | Unknown protein                                                                                                         |
| At2g28110            | 41                                    | 1                | FRA8 (FRAGILE FIBER 8); glucuronosyltransferase/ transferase                                                            |
| At2g28380            | 27                                    | 0                | DRB2 (DSRNA-BINDING PROTEIN 2); double-stranded RNA binding                                                             |
| At2g28480            | 29                                    | 0                | RNA binding                                                                                                             |
| At2g28680            | 19                                    | 0                | Cupin family protein                                                                                                    |
| At2g28800            | 39                                    | 1                | ALB3 (ALBINO 3); P-P-bond-hydrolysis-driven protein transmembrane transporter                                           |
| At2g28930            | 14                                    | 0                | APK1B; ATP binding / kinase/ protein kinase/ protein serine/threonine kinase                                            |
| At2g29080            | 12                                    | 0                | Ftsh3 (FtsH protease 3); ATP-dependent peptidase/ ATPase                                                                |
| At2g29200            | 20                                    | 0                | APUM1 (Arabidopsis Pumilio 1); RNA binding / binding                                                                    |
| At2g29660            | 35                                    | 0                | Zinc finger (C2H2 type) family protein                                                                                  |
| At2g29700            | 25                                    | 0                | ATPH1 (ARABIDOPSIS THALIANA PLECKSTRIN HOMOLOGUE 1); phosphoinositide binding                                           |
| At2g29970            | 32                                    | 0                | Heat shock protein-related                                                                                              |
| At2g30200            | 19                                    | 0                | [acyl-carrier-protein] S-malonyltransferase/ binding / catalytic/ transferase                                           |
| At2g30270            | 25                                    | 1                | Unknown protein                                                                                                         |
| At2g30984            | 11                                    | 0                | Potential natural antisense gene, locus overlaps with At2g30985                                                         |
| At2g31141            | 24                                    | 0                | Unknown protein                                                                                                         |
| At2g31530            | 12                                    | 0                | EMB2289 (EMBRYO DEFECTIVE 2289); P-P-bond-hydrolysis-driven protein transmembrane transporter                           |
| At2g31870            | 30                                    | 0                | TEJ (Sanskrit for 'bright'); poly(ADP-ribose) glycohydrolase                                                            |
| At2g31985            | 22                                    | 0                | Unknown protein                                                                                                         |
| At2g32400            | 34                                    | 0                | GLR5 (GLUTAMATE RECEPTOR 5); intracellular ligand-gated ion channel                                                     |
| At2g32560            | 9                                     | 0                | F-box family protein                                                                                                    |
| At2g32600            | 42                                    | 0                | hydroxyproline-rich glycoprotein family protein                                                                         |
| At2g32720            | 131                                   | 0                | CB5-B (CYTOCHROME B5 ISOFORM B); heme binding                                                                           |
| At2g33400            | 92                                    | 1                | Unknown protein                                                                                                         |
| At2g33610            | 12                                    | 0                | ATSWI3B (SWITCH SUBUNIT 3); DNA binding                                                                                 |
| At2g33775            | 17                                    | 0                | RALFL19 (ralf-like 19); signal transducer                                                                               |
| At2g33980            | 9                                     | 0                | Atnudt22 (Arabidopsis thaliana Nudix hydrolase homolog 22); hydrolase                                                   |
| At2g35030            | 10                                    | 0                | Pentatricopeptide (PPR) repeat-containing protein                                                                       |
| At2g35240            | 30                                    | 0                | Plastid developmental protein DAG, putative                                                                             |
| At2g35250            | 9                                     | 0                | Unknown protein                                                                                                         |
| At2g35330            | 82                                    | 1                | Protein binding / zinc ion binding                                                                                      |
| At2g35470            | 54                                    | 1                | Unknown protein                                                                                                         |

Supplementary Table 4

| GENE ID <sup>a</sup> | Transcriptional activity <sup>b</sup> |                 | PREDICTED FUNCTION <sup>c</sup>                                                                                                                                          |
|----------------------|---------------------------------------|-----------------|--------------------------------------------------------------------------------------------------------------------------------------------------------------------------|
|                      | Wild type ovule                       | <i>sp/ovule</i> |                                                                                                                                                                          |
| At2g35550            | 32                                    | 0               | BPC7 (BASIC PENTACYSTEINE 7); DNA binding / transcription factor                                                                                                         |
| At2g34680            | 24                                    | 0               | AIR9; protein binding                                                                                                                                                    |
| At2g34690            | 118                                   | 3               | ACD11 (ACCELERATED CELL DEATH 11); sphingosine transmembrane transporter                                                                                                 |
| At2g34700            | 16                                    | 0               | Pollen Ole e 1 allergen and extensin family protein                                                                                                                      |
| At2g35690            | 27                                    | 1               | ACX5 (ACYL-COA OXIDASE 5); FAD binding / acyl-CoA dehydrogenase/ acyl-CoA oxidase/ electron carrier/ oxidoreductase/ oxidoreductase, acting on the CH-CH group of donors |
| At2g35840            | 25                                    | 0               | Sucrose-phosphatase 1 (SPP1)                                                                                                                                             |
| At2g36610            | 78                                    | 0               | ATHB22 (ARABIDOPSIS THALIANA HOMEBOX PROTEIN 22); DNA binding / transcription factor                                                                                     |
| At2g36810            | 13                                    | 0               | Binding                                                                                                                                                                  |
| At2g36835            | 25                                    | 0               | Unknown protein                                                                                                                                                          |
| At2g37050            | 33                                    | 0               | Kinase                                                                                                                                                                   |
| At2g37060            | 54                                    | 1               | NF-YB8 (NUCLEAR FACTOR Y, SUBUNIT B8); transcription factor                                                                                                              |
| At2g37120            | 34                                    | 1               | DNA-binding S1FA family protein                                                                                                                                          |
| At2g37470            | 23                                    | 0               | Histone H2B, putative                                                                                                                                                    |
| At2g37520            | 24                                    | 0               | PHD finger family protein                                                                                                                                                |
| At2g37550            | 26                                    | 0               | AGD7; ARF GTPase activator/ DNA binding / zinc ion binding                                                                                                               |
| At2g37640            | 26                                    | 0               | EXP3                                                                                                                                                                     |
| At2g37740            | 9                                     | 0               | ZFP10 (ZINC-FINGER PROTEIN 10); nucleic acid binding / transcription factor/ zinc ion binding                                                                            |
| At2g37840            | 18                                    | 0               | Protein kinase family protein                                                                                                                                            |
| At2g37890            | 17                                    | 0               | Mitochondrial substrate carrier family protein                                                                                                                           |
| At2g38140            | 48                                    | 0               | PSRP4 (PLASTID-SPECIFIC RIBOSOMAL PROTEIN 4); structural constituent of ribosome                                                                                         |
| At2g38280            | 10                                    | 0               | FAC1 (EMBRYONIC FACTOR1); AMP deaminase                                                                                                                                  |
| At2g38410            | 11                                    | 0               | VHS domain-containing protein / GAT domain-containing protein                                                                                                            |
| At2g38630            | 27                                    | 0               | Transducin/WD40 repeat-like superfamily protein                                                                                                                          |
| At2g38680            | 14                                    | 0               | 5'-nucleotidase/ magnesium ion binding                                                                                                                                   |
| At2g39140            | 9                                     | 0               | SVR1 (SUPPRESSOR OF VARIEGATION 1); RNA binding / pseudouridine synthase                                                                                                 |
| At2g39270            | 42                                    | 0               | Adenylate kinase family protein                                                                                                                                          |
| At2g39390            | 80                                    | 0               | 60S ribosomal protein L35 (RPL35B)                                                                                                                                       |
| At2g39740            | 11                                    | 0               | Unknown protein                                                                                                                                                          |
| At2g39930            | 180                                   | 6               | ISA1 (ISOAMYLASE 1); alpha-amylase/ isoamylase                                                                                                                           |
| At2g40095            | 18                                    | 0               | Unknown protein                                                                                                                                                          |
| At2g40760            | 46                                    | 0               | Rhodanese-like domain-containing protein                                                                                                                                 |
| At2g40765            | 46                                    | 1               | Unknown protein                                                                                                                                                          |
| At2g40780            | 13                                    | 0               | RNA binding / translation initiation factor                                                                                                                              |
| At2g40880            | 9                                     | 0               | ATCYSA (CYSTATIN A); cysteine-type endopeptidase inhibitor                                                                                                               |
| At2g40935            | 32                                    | 0               | Unknown protein                                                                                                                                                          |

Supplementary Table 4

| GENE ID <sup>a</sup> | Transcriptional activity <sup>b</sup> |                   | PREDICTED FUNCTION <sup>c</sup>                                                                                                  |
|----------------------|---------------------------------------|-------------------|----------------------------------------------------------------------------------------------------------------------------------|
|                      | Wild type ovule                       | <i>sp</i> / ovule |                                                                                                                                  |
| At2g40950            | 253                                   | 0 1               | EBZ1 (EPITHANACEA DORMING EVANSORIPINA BINDING) / transcription factor                                                           |
| At2g41650            | 9                                     | 0                 | Unknown protein                                                                                                                  |
| At2g41710            | 144                                   | 4                 | Ovule development protein, putative                                                                                              |
| At2g42005            | 85                                    | 0                 | Amino acid transporter family protein                                                                                            |
| At2g42070            | 17                                    | 0                 | ATNUDX23 (ARABIDOPSIS THALIANA NUDIX HYDROLASE HOMOLOG 23); FAD diphosphatase/ hydrolase                                         |
| At2g42570            | 57                                    | 1                 | Unknown protein                                                                                                                  |
| At2g42590            | 91                                    | 0                 | GRF9 (GENERAL REGULATORY FACTOR 9); calcium ion binding / protein binding / protein phosphorylated amino acid binding            |
| At2g42620            | 33                                    | 0                 | MAX2 (MORE AXILLARY BRANCHES 2); ubiquitin-protein ligase                                                                        |
| At2g42640            | 28                                    | 0                 | ATP binding / protein kinase/ protein serine/threonine kinase/ protein tyrosine kinase                                           |
| At2g42650            | 57                                    | 0                 | 60S ribosomal protein-related                                                                                                    |
| At2g42740            | 66                                    | 0                 | RPL16A; structural constituent of ribosome                                                                                       |
| At2g43230            | 45                                    | 0                 | Serine/threonine protein kinase, putative                                                                                        |
| At2g43250            | 27                                    | 0                 | Unknown protein                                                                                                                  |
| At2g43330            | 32                                    | 0                 | INT1 (INOSITOL TRANSPORTER 1); carbohydrate transmembrane transporter/ myo-inositol:hydrogen symporter/ sugar:hydrogen symporter |
| At2g43530            | 29                                    | 1                 | Trypsin inhibitor, putative                                                                                                      |
| At2g44440            | 42                                    | 0                 | Emsy N terminus domain-containing protein / ENT domain-containing protein                                                        |
| At2g44490            | 35                                    | 0                 | PEN2 (PENETRATION 2); hydrolase, hydrolyzing O-glycosyl compounds / thioglucosidase                                              |
| At2g44740            | 24                                    | 0                 | CYCP4;1 (cyclin p4;1); cyclin-dependent protein kinase                                                                           |
| At2g45160            | 150                                   | 6                 | Scarecrow transcription factor family protein                                                                                    |
| At2g45260            | 12                                    | 0                 | Unknown protein                                                                                                                  |
| At2g45720            | 29                                    | 1                 | Armadillo/beta-catenin repeat family protein                                                                                     |
| At2g45870            | 35                                    | 0                 | Unknown protein                                                                                                                  |
| At2g46020            | 23                                    | 0                 | Transcription regulatory protein SNF2, putative                                                                                  |
| At2g46030            | 50                                    | 1                 | UBC6 (ubiquitin-conjugating enzyme 6); ubiquitin-protein ligase                                                                  |
| At2g46040            | 18                                    | 0                 | ARID/BRIGHT DNA-binding domain-containing protein / ELM2 domain-containing protein                                               |
| At2g46200            | 32                                    | 0                 | Unknown protein                                                                                                                  |
| At2g46490            | 110                                   | 4                 | Unknown protein                                                                                                                  |
| At2g46590            | 49                                    | 1                 | DAG2 (DOF AFFECTING GERMINATION 2); DNA binding / transcription factor                                                           |
| At2g46830            | 49                                    | 0                 | CCA1 (CIRCADIAN CLOCK ASSOCIATED 1); DNA binding / transcription activator/ transcription factor/ transcription repressor        |
| At2g46950            | 23                                    | 0                 | CYP709B2; electron carrier/ heme binding / iron ion binding / monooxygenase/ oxygen binding                                      |
| At2g47010            | 32                                    | 0                 | Unknown protein                                                                                                                  |
| At2g47030            | 11                                    | 0                 | VGDH1; enzyme inhibitor/ pectinesterase                                                                                          |



Supplementary Table 4

| GENE ID <sup>a</sup> | Transcriptional activity <sup>b</sup> |                  | PREDICTED FUNCTION <sup>c</sup>                                                                                                            |
|----------------------|---------------------------------------|------------------|--------------------------------------------------------------------------------------------------------------------------------------------|
|                      | Wild type ovule                       | <i>sp/ ovule</i> |                                                                                                                                            |
| At2g47180            | 18                                    | 0                | AtGolS1 (Arabidopsis thaliana galactinol synthase 1); transferase, transferring glycosyl groups / transferase, transferring hexosyl groups |
| At2g47400            | 253                                   | 10               | CP12-1                                                                                                                                     |
| At2g47420            | 58                                    | 0                | Dimethyladenosine transferase, putative                                                                                                    |
| At2g47450            | 50                                    | 1                | CAO (CHAOS); chromatin binding                                                                                                             |
| At2g47900            | 21                                    | 0                | AtTLP3 (TUBBY LIKE PROTEIN 3); phosphoric diester hydrolase/transcription factor                                                           |
| At2g48030            | 18                                    | 0                | Endonuclease/exonuclease/phosphatase family protein                                                                                        |
| At3g01230            | 22                                    | 0                | Unknown protein                                                                                                                            |
| At3g01270            | 16                                    | 0                | Pectate lyase family protein                                                                                                               |
| At3g01330            | 26                                    | 0                | DEL3 (DP-E2F-LIKE PROTEIN 3); DNA binding / transcription factor                                                                           |
| At3g01380            | 17                                    | 0                | Catalytic/ transferase                                                                                                                     |
| At3g01410            | 40                                    | 0                | RNase H domain-containing protein                                                                                                          |
| At3g01460            | 31                                    | 0                | MBD9; DNA binding / methyl-CpG binding                                                                                                     |
| At3g01760            | 23                                    | 0                | Lysine and histidine specific transporter, putative                                                                                        |
| At3g01810            | 22                                    | 0                | Unknown function                                                                                                                           |
| At3g02065            | 19                                    | 0                | DEAD/DEAH box helicase family protein                                                                                                      |
| At3g02070            | 22                                    | 0                | OTU-like cysteine protease family protein                                                                                                  |
| At3g02100            | 16                                    | 0                | UDP-glucuronosyl/UDP-glucosyl transferase family protein                                                                                   |
| At3g02180            | 67                                    | 1                | SP1L3 (SPIRAL 1-LIKE3)                                                                                                                     |
| At3g02340            | 16                                    | 0                | Zinc finger (C3HC4-type RING finger) family protein                                                                                        |
| At3g02460            | 54                                    | 0                | Plant adhesion molecule, putative                                                                                                          |
| At3g02560            | 53                                    | 1                | 40S ribosomal protein S7 (RPS7B)                                                                                                           |
| At3g02970            | 9                                     | 0                | EXL6 (EXORDIUM LIKE 6)                                                                                                                     |
| At3g03170            | 10                                    | 0                | Unknown protein                                                                                                                            |
| At3g03272            | 18                                    | 0                | Encodes a ECA1 gametogenesis related family protein                                                                                        |
| At3g03440            | 21                                    | 0                | Armadillo/beta-catenin repeat family protein                                                                                               |
| At3g03630            | 19                                    | 0                | CS26; cysteine synthase                                                                                                                    |
| At3g04040            | 40                                    | 0                | Unknown protein                                                                                                                            |
| At3g04090            | 65                                    | 0                | SIPIA (SMALL AND BASIC INTRINSIC PROTEIN 1A); water channel                                                                                |
| At3g04350            | 22                                    | 0                | Unknown protein                                                                                                                            |
| At3g04460            | 11                                    | 0                | PEX12; protein binding / zinc ion binding                                                                                                  |
| At3g04605            | 17                                    | 0                | Transposable element gene                                                                                                                  |
| At3g04640            | 32                                    | 0                | Glycine-rich protein                                                                                                                       |
| At3g04700            | 22                                    | 0                | Unknown protein                                                                                                                            |
| At3g04780            | 63                                    | 2                | Encodes a protein with little sequence identity with any other protein of known structure or function.                                     |
| At3g05050            | 10                                    | 0                | Protein kinase family protein                                                                                                              |
| At3g05460            | 18                                    | 0                | Sporozoite surface protein-related                                                                                                         |
| At3g05685            | 56                                    | 2                | Cystatin/monellin superfamily protein                                                                                                      |

Supplementary Table 4

| GENE ID <sup>a</sup> | Transcriptional activity <sup>b</sup> |                  | PREDICTED FUNCTION <sup>c</sup>                                                         |
|----------------------|---------------------------------------|------------------|-----------------------------------------------------------------------------------------|
|                      | Wild type ovule                       | <i>sp/ ovule</i> |                                                                                         |
| At3g05720            | 31                                    | 0                | IMPA-7 (IMPORTIN ALPHA ISOFORM 7); binding / protein transporter                        |
| At3g05770            | 14                                    | 0                | Unknown protein                                                                         |
| At3g05970            | 11                                    | 0                | LACS6 (long-chain acyl-CoA synthetase 6); long-chain-fatty-acid-CoA ligase              |
| At3g06000            | 22                                    | 0                | Leucine-rich repeat family protein                                                      |
| At3g06020            | 10                                    | 0                | Unknown protein                                                                         |
| At3g06300            | 13                                    | 0                | AT-P4H-2 (A. THALIANA P4H ISOFORM 2); oxidoreductase                                    |
| At3g06420            | 30                                    | 1                | ATG8H (autophagy 8h); microtubule binding                                               |
| At3g06580            | 35                                    | 0                | GALK; ATP binding / galactokinase                                                       |
| At3g06660            | 32                                    | 1                | PAPA-1-like family protein / zinc finger (HIT type) family protein                      |
| At3g06778            | 25                                    | 0                | Heat shock protein binding / unfolded protein binding                                   |
| At3g06780            | 18                                    | 0                | Glycine-rich protein                                                                    |
| At3g06790            | 57                                    | 0                | Plastid developmental protein DAG, putative                                             |
| At3g06940            | 10                                    | 0                | Transposable element gene                                                               |
| At3g07005            | 24                                    | 0                | LCR43 (Low-molecular-weight cysteine-rich 43)                                           |
| At3g07160            | 86                                    | 0                | ATGSL10 (glucan synthase-like 10); 1,3-beta-glucan synthase                             |
| At3g07370            | 22                                    | 0                | CHIP (CARBOXYL TERMINUS OF HSC70-INTERACTING PROTEIN); ubiquitin-protein ligase         |
| At3g07460            | 84                                    | 0                | Unknown protein                                                                         |
| At3g07520            | 22                                    | 0                | GLR1.4 (GLUTAMATE RECEPTOR 1.4); cation channel/ intracellular ligand-gated ion channel |
| At3g07820            | 9                                     | 0                | Polygalacturonase 3 (PGA3) / pectinase                                                  |
| At3g07880            | 27                                    | 1                | Rho GDP-dissociation inhibitor family protein                                           |
| At3g08960            | 61                                    | 0                | Binding / protein transporter                                                           |
| At3g09035            | 35                                    | 0                | Legume lectin family protein                                                            |
| At3g09070            | 50                                    | 0                | Glycine-rich protein                                                                    |
| At3g09740            | 120                                   | 4                | SYP71 (SYNTAXIN OF PLANTS 71); protein transporter                                      |
| At3g09770            | 28                                    | 0                | Zinc finger (C3HC4-type RING finger) family protein                                     |
| At3g09900            | 31                                    | 0                | ATRABE1E (ARABIDOPSIS RAB GTPASE HOMOLOG E1E); GTP binding                              |
| At3g10250            | 19                                    | 0                | Unknown protein                                                                         |
| At3g10410            | 18                                    | 0                | scpl49 (serine carboxypeptidase-like 49); serine-type carboxypeptidase                  |
| At3g10420            | 30                                    | 1                | Sporulation protein-related                                                             |
| At3g10760            | 15                                    | 0                | Myb family transcription factor                                                         |
| At3g11420            | 22                                    | 0                | Fringe-related protein                                                                  |
| At3g11590            | 22                                    | 0                | Unknown protein                                                                         |
| At3g11890            | 15                                    | 0                | Sterile alpha motif (SAM) domain-containing protein                                     |
| At3g12100            | 19                                    | 0                | Cation efflux family protein / metal tolerance protein, putative                        |
| At3g12180            | 9                                     | 0                | Cornichon family protein                                                                |
| At3g12260            | 54                                    | 2                | Complex 1 family protein / LVR family protein                                           |
| At3g12350            | 53                                    | 0                | F-box family protein                                                                    |

Supplementary Table 4

| GENE ID <sup>a</sup> | Transcriptional activity <sup>b</sup> |                  | PREDICTED FUNCTION <sup>c</sup>                                                                                                    |
|----------------------|---------------------------------------|------------------|------------------------------------------------------------------------------------------------------------------------------------|
|                      | Wild type ovule                       | <i>sp/ ovule</i> |                                                                                                                                    |
| At3g12360            | 39                                    | 0                | ITN1 (INCREASED TOLERANCE TO NACL); protein binding                                                                                |
| At3g12530            | 10                                    | 0                | PSF2                                                                                                                               |
| At3g12560            | 31                                    | 1                | TRFL9 (TRF-LIKE 9); DNA bending/ DNA binding / telomeric DNA binding                                                               |
| At3g12690            | 10                                    | 0                | AGC1.5 (AGC KINASE 1.5); kinase                                                                                                    |
| At3g12820            | 17                                    | 0                | AtMYB10 (myb domain protein 10); DNA binding / transcription factor                                                                |
| At3g12930            | 34                                    | 1                | Nascent polypeptide-associated complex (NAC), alpha subunit family protein                                                         |
| At3g13030            | 33                                    | 0                | hAT dimerisation domain-containing protein                                                                                         |
| At3g13050            | 16                                    | 0                | Transporter-related                                                                                                                |
| At3g13120            | 45                                    | 0                | 30S ribosomal protein S10, chloroplast, putative                                                                                   |
| At3g13350            | 33                                    | 0                | High mobility group (HMG1/2) family protein / ARID/BRIGHT DNA-binding domain-containing protein                                    |
| At3g13360            | 53                                    | 0                | WIP3 (WPP-domain Interacting Protein 3)                                                                                            |
| At3g13390            | 13                                    | 0                | sks11 (SKU5 Similar 11); copper ion binding / oxidoreductase                                                                       |
| At3g13440            | 11                                    | 0                | Methyltransferase/ nucleic acid binding                                                                                            |
| At3g13570            | 21                                    | 0                | SCL30a; RNA binding / nucleic acid binding / nucleotide binding                                                                    |
| At3g13782            | 12                                    | 0                | NAP1;4 (NUCLEOSOME ASSEMBLY PROTEIN1;4); DNA binding / chromatin binding                                                           |
| At3g14090            | 10                                    | 0                | ATEXO70D3 (exocyst subunit EXO70 family protein D3); protein binding                                                               |
| At3g14100            | 93                                    | 0                | Oligouridylate-binding protein, putative                                                                                           |
| At3g14380            | 17                                    | 0                | Integral membrane family protein                                                                                                   |
| At3g15030            | 15                                    | 0                | TCP4 (TCP family transcription factor 4); transcription factor                                                                     |
| At3g15160            | 15                                    | 0                | Unknown protein                                                                                                                    |
| At3g15355            | 12                                    | 0                | UBC25 (UBIQUITIN-CONJUGATING ENZYME 25); small conjugating protein ligase                                                          |
| At3g15450            | 312                                   | 7                | Unknown protein                                                                                                                    |
| At3g15630            | 111                                   | 0                | Unknown protein                                                                                                                    |
| At3g16020            | 13                                    | 0                | Phospholipase C                                                                                                                    |
| At3g16130            | 29                                    | 0                | ROPGEF13; Rho guanyl-nucleotide exchange factor                                                                                    |
| At3g16190            | 36                                    | 0                | Isochorismatase hydrolase family protein                                                                                           |
| At3g16200            | 33                                    | 0                | Unknown protein                                                                                                                    |
| At3g16220            | 15                                    | 0                | Predicted eukaryotic LigT                                                                                                          |
| At3g16480            | 15                                    | 0                | MPPalpha (mitochondrial processing peptidase alpha subunit); catalytic/ metal ion binding / metalloendopeptidase/ zinc ion binding |
| At3g16730            | 31                                    | 0                | Unknown protein                                                                                                                    |
| At3g16850            | 66                                    | 1                | Glycoside hydrolase family 28 protein / polygalacturonase (pectinase) family protein                                               |
| At3g17030            | 43                                    | 0                | Nucleic acid-binding proteins superfamily                                                                                          |
| At3g17160            | 120                                   | 0                | Unknown protein                                                                                                                    |
| At3g17205            | 12                                    | 0                | UPL6 (UBIQUITIN PROTEIN LIGASE 6); ubiquitin-protein ligase                                                                        |

Supplementary Table 4

| GENE ID <sup>a</sup> | Transcriptional activity <sup>b</sup> |                 | PREDICTED FUNCTION <sup>c</sup>                                                                                                                               |
|----------------------|---------------------------------------|-----------------|---------------------------------------------------------------------------------------------------------------------------------------------------------------|
|                      | Wild type ovule                       | <i>sp/ovule</i> |                                                                                                                                                               |
| At3g17210            | 14                                    | 0               | HS1 (HEAT STABLE PROTEIN 1)                                                                                                                                   |
| At3g17450            | 28                                    | 1               | hAT dimerisation domain-containing protein                                                                                                                    |
| At3g17970            | 25                                    | 0               | AtToc64-III (Arabidopsis thaliana translocon at the outer membrane of chloroplasts 64-III); binding / carbon-nitrogen ligase, with glutamine as amido-N-donor |
| At3g18350            | 10                                    | 0               | Unknown protein                                                                                                                                               |
| At3g18480            | 38                                    | 0               | AtCASP (Arabidopsis thaliana CCAAT-displacement protein alternatively spliced product)                                                                        |
| At3g18535            | 24                                    | 0               | Other RNA                                                                                                                                                     |
| At3g19360            | 16                                    | 0               | Zinc finger (CCCH-type) family protein                                                                                                                        |
| At3g19970            | 16                                    | 0               | Unknown protein                                                                                                                                               |
| At3g20170            | 41                                    | 0               | Armadillo/beta-catenin repeat family protein                                                                                                                  |
| At3g20250            | 50                                    | 1               | APUM5 (Arabidopsis Pumilio 5); RNA binding / binding                                                                                                          |
| At3g20395            | 30                                    | 0               | Protein binding / zinc ion binding                                                                                                                            |
| At3g20540            | 47                                    | 0               | POLGAMMA1 (polymerase gamma 1); 3'-5' exonuclease/ DNA binding                                                                                                |
| At3g20650            | 34                                    | 0               | mRNA capping enzyme family protein                                                                                                                            |
| At3g20680            | 14                                    | 0               | Unknown protein                                                                                                                                               |
| At3g20720            | 48                                    | 0               | Unknown protein                                                                                                                                               |
| At3g20890            | 30                                    | 1               | RNA binding / nucleic acid binding / nucleotide binding                                                                                                       |
| At3g20920            | 14                                    | 0               | Translocation protein-related                                                                                                                                 |
| At3g20970            | 43                                    | 1               | NFU4; structural molecule                                                                                                                                     |
| At3g21055            | 25                                    | 0               | PSBTN (photosystem II subunit T)                                                                                                                              |
| At3g21175            | 28                                    | 0               | ZML1 (ZIM-LIKE 1); sequence-specific DNA binding / transcription factor/ zinc ion binding                                                                     |
| At3g21215            | 26                                    | 0               | RNA-binding protein, putative                                                                                                                                 |
| At3g21630            | 23                                    | 0               | CERK1 (CHITIN ELICITOR RECEPTOR KINASE 1); kinase/ receptor signaling protein/ transmembrane receptor protein kinase                                          |
| At3g21740            | 90                                    | 0               | APO4 (ACCUMULATION OF PHOTOSYSTEM ONE 4)                                                                                                                      |
| At3g22160            | 16                                    | 0               | VQ motif-containing protein                                                                                                                                   |
| At3g22425            | 14                                    | 0               | IGPD; imidazoleglycerol-phosphate dehydratase                                                                                                                 |
| At3g22430            | 20                                    | 0               | Unknown protein                                                                                                                                               |
| At3g22760            | 33                                    | 0               | SOL1; transcription factor                                                                                                                                    |
| At3g22810            | 9                                     | 0               | Phosphoinositide binding                                                                                                                                      |
| At3g22880            | 52                                    | 2               | DMC1 (DISRUPTION OF MEIOTIC CONTROL 1)                                                                                                                        |
| At3g23030            | 15                                    | 0               | IAA2 (INDOLE-3-ACETIC ACID INDUCIBLE 2)                                                                                                                       |
| At3g23080            | 30                                    | 1               | Polyketide cyclase/dehydrase and lipid transport superfamily protein                                                                                          |
| At3g23100            | 21                                    | 0               | XRCC4; protein C-terminus binding                                                                                                                             |
| At3g23710            | 26                                    | 1               | Chloroplast inner membrane import protein Tic22, putative                                                                                                     |
| At3g23805            | 35                                    | 0               | RALFL24 (ralf-like 24); signal transducer                                                                                                                     |
| At3g24230            | 117                                   | 3               | Pectate lyase family protein                                                                                                                                  |

Supplementary Table 4

| GENE ID <sup>a</sup> | Transcriptional activity <sup>b</sup> |                  | PREDICTED FUNCTION <sup>c</sup>                                                                               |
|----------------------|---------------------------------------|------------------|---------------------------------------------------------------------------------------------------------------|
|                      | Wild type ovule                       | <i>sp/ ovule</i> |                                                                                                               |
| At3g24480            | 84                                    | 1                | Leucine-rich repeat family protein / extensin family protein                                                  |
| At3g24510            | 136                                   | 4                | Encodes a defensin-like (DEFL) family protein.                                                                |
| At3g24927            | 27                                    | 0                | Pseudogene of Unknown protein                                                                                 |
| At3g25260            | 12                                    | 0                | Proton-dependent oligopeptide transport (POT) family protein                                                  |
| At3g25590            | 9                                     | 0                | Unknown protein                                                                                               |
| At3g25717            | 19                                    | 0                | RTFL16 (ROTUNDIFOLIA LIKE 16)                                                                                 |
| At3g26020            | 12                                    | 0                | Serine/threonine protein phosphatase 2A (PP2A) regulatory subunit B', putative                                |
| At3g26070            | 66                                    | 2                | Plastid-lipid associated protein PAP / fibrillin family protein                                               |
| At3g26410            | 12                                    | 0                | Methyltransferase/ nucleic acid binding                                                                       |
| At3g26618            | 9                                     | 0                | ERF1-3 (eukaryotic release factor 1-3); translation release factor                                            |
| At3g26910            | 24                                    | 0                | Hydroxyproline-rich glycoprotein family protein                                                               |
| At3g27300            | 30                                    | 0                | G6PD5 (glucose-6-phosphate dehydrogenase 5); glucose-6-phosphate dehydrogenase                                |
| At3g27990            | 14                                    | 0                | Unknown gene                                                                                                  |
| At3g28050            | 13                                    | 0                | Nnodulin MtN21 family protein                                                                                 |
| At3g28345            | 17                                    | 0                | ABC transporter family protein                                                                                |
| At3g28450            | 32                                    | 1                | Leucine-rich repeat transmembrane protein kinase, putative                                                    |
| At3g28560            | 10                                    | 0                | BCS1 AAA-type ATPase                                                                                          |
| At3g28690            | 14                                    | 0                | Protein kinase, putative                                                                                      |
| At3g28840            | 24                                    | 0                | Unknown protein                                                                                               |
| At3g28917            | 11                                    | 0                | MIF2 (MINI ZINC FINGER 2); DNA binding                                                                        |
| At3g28970            | 9                                     | 0                | AAR3 (antiauxin-resistant 3)                                                                                  |
| At3g28980            | 17                                    | 0                | Unknown protein                                                                                               |
| At3g29020            | 9                                     | 0                | MYB110 (myb domain protein 110); DNA binding / transcription factor                                           |
| At3g29160            | 44                                    | 0                | AKIN11 (Arabidopsis SNF1 kinase homolog 11); protein binding / protein kinase                                 |
| At3g29260            | 14                                    | 0                | Short-chain dehydrogenase/reductase (SDR) family protein                                                      |
| At3g29270            | 12                                    | 0                | Ubiquitin-protein ligase                                                                                      |
| At3g29370            | 11                                    | 0                | Unknown protein                                                                                               |
| At3g29375            | 16                                    | 0                | XH domain-containing protein                                                                                  |
| At3g42670            | 23                                    | 0                | CHR38 (CHROMATIN REMODELING 38); ATP binding / DNA binding / helicase/ nucleic acid binding                   |
| At3g43220            | 28                                    | 1                | Phosphoinositide phosphatase family protein                                                                   |
| At3g43850            | 21                                    | 0                | Unknown protein                                                                                               |
| At3g43860            | 22                                    | 0                | AtGH9A4 (Arabidopsis thaliana Glycosyl Hydrolase 9A4); catalytic/ hydrolase, hydrolyzing O-glycosyl compounds |
| At3g44330            | 16                                    | 0                | Unknown function                                                                                              |
| At3g44735            | 11                                    | 0                | PSK1; growth factor                                                                                           |
| At3g44850            | 19                                    | 0                | Protein kinase-related                                                                                        |

Supplementary Table 4

| GENE ID <sup>a</sup> | Transcriptional activity <sup>b</sup> |                  | PREDICTED FUNCTION <sup>c</sup>                                                                                     |
|----------------------|---------------------------------------|------------------|---------------------------------------------------------------------------------------------------------------------|
|                      | Wild type ovule                       | <i>sp/</i> ovule |                                                                                                                     |
| At3g45040            | 22                                    | 0                | Phosphatidate cytidyltransferase family protein                                                                     |
| At3g46668            | 16                                    | 0                | Other RNA                                                                                                           |
| At3g47342            | 30                                    | 0                | snoRNA                                                                                                              |
| At3g47450            | 27                                    | 0                | NOA1 (NO ASSOCIATED 1); GTPase/ nitric-oxide synthase                                                               |
| At3g47620            | 12                                    | 0                | AtTCP14 (TEOSINTE BRANCHED1, CYCLOIDEA and PCF (TCP) 14); transcription factor                                      |
| At3g47730            | 22                                    | 0                | ATATH1; ATPase, coupled to transmembrane movement of substances / transporter                                       |
| At3g48030            | 36                                    | 0                | Hypoxia-responsive family protein / zinc finger (C3HC4-type RING finger) family protein                             |
| At3g48530            | 19                                    | 0                | KING1 (SNF1-RELATED PROTEIN KINASE REGULATORY SUBUNIT GAMMA 1)                                                      |
| At3g48610            | 11                                    | 0                | Phosphoesterase family protein                                                                                      |
| At3g48690            | 17                                    | 0                | CXE12; carboxylesterase                                                                                             |
| At3g48860            | 52                                    | 0                | Unknown protein                                                                                                     |
| At3g48880            | 12                                    | 0                | F-box family protein                                                                                                |
| At3g48890            | 17                                    | 0                | ATMP2; heme binding                                                                                                 |
| At3g48950            | 11                                    | 0                | Glycoside hydrolase family 28 protein / polygalacturonase (pectinase) family protein                                |
| At3g49050            | 14                                    | 0                | Lipase class 3 family protein / calmodulin-binding heat-shock protein, putative                                     |
| At3g49051            | 26                                    | 0                | Unknown protein                                                                                                     |
| At3g49100            | 20                                    | 0                | signal recognition particle 9 kDa protein, putative / SRP9, putative                                                |
| At3g49350            | 9                                     | 0                | RAB GTPase activator                                                                                                |
| At3g49420            | 45                                    | 0                | Got1-like family protein                                                                                            |
| At3g49920            | 9                                     | 0                | VDAC5 (VOLTAGE DEPENDENT ANION CHANNEL 5); voltage-gated anion channel                                              |
| At3g50050            | 9                                     | 0                | Aspartyl protease family protein                                                                                    |
| At3g50665            | 22                                    | 0                | pre-tRNA; tRNA-Glu (anticodon: TTC)                                                                                 |
| At3g51440            | 22                                    | 0                | Strictosidine synthase family protein                                                                               |
| At3g51450            | 25                                    | 0                | Strictosidine synthase family protein                                                                               |
| At3g51500            | 9                                     | 0                | Unknown protein                                                                                                     |
| At3g51980            | 45                                    | 0                | Binding                                                                                                             |
| At3g52060            | 9                                     | 0                | Unknown protein                                                                                                     |
| At3g52070            | 43                                    | 0                | Unknown protein                                                                                                     |
| At3g52072            | 17                                    | 0                | Potential natural antisense gene, locus overlaps with AT3G52070                                                     |
| At3g52280            | 11                                    | 0                | GTE6 (GENERAL TRANSCRIPTION FACTOR GROUP E6); DNA binding / H3/H4 histone acetyltransferase                         |
| At3g52290            | 28                                    | 0                | IQD3 (IQ-domain 3); calmodulin binding                                                                              |
| At3g52560            | 123                                   | 2                | UEV1D-4 (UBIQUITIN E2 VARIANT 1D-4); protein binding / ubiquitin-protein ligase                                     |
| At3g52800            | 20                                    | 0                | Zinc finger (AN1-like) family protein                                                                               |
| At3g53110            | 10                                    | 0                | LOS4 (LOW EXPRESSION OF OSMOTICALLY RESPONSIVE GENES 4); ATP-dependent helicase/ RNA helicase/ RNA-dependent ATPase |

Supplementary Table 4

| GENE ID <sup>a</sup> | Transcriptional activity <sup>b</sup> |                 | PREDICTED FUNCTION <sup>c</sup>                                                                  |
|----------------------|---------------------------------------|-----------------|--------------------------------------------------------------------------------------------------|
|                      | Wild type ovule                       | <i>sp/ovule</i> |                                                                                                  |
| At3g53340            | 74                                    | 0               | NF-YB10 (NUCLEAR FACTOR Y, SUBUNIT B10); transcription factor                                    |
| At3g53420            | 130                                   | 0               | PIP2A (PLASMA MEMBRANE INTRINSIC PROTEIN 2A); water channel                                      |
| At3g53620            | 10                                    | 0               | AtPPa4 (Arabidopsis thaliana pyrophosphorylase 4); inorganic diphosphatase                       |
| At3g54420            | 27                                    | 0               | ATEP3; chitinase                                                                                 |
| At3g55060            | 34                                    | 0               | Unknown protein                                                                                  |
| At3g56010            | 12                                    | 0               | Unknown protein                                                                                  |
| At3g56030            | 9                                     | 0               | Pentatricopeptide (PPR) repeat-containing protein                                                |
| At3g56070            | 26                                    | 0               | ROC2 (ROTAMASE CYCLOPHILIN 2); cyclosporin A binding / peptidyl-prolyl cis-trans isomerase       |
| At3g56110            | 82                                    | 1               | PRA1.B1 (PRENYLATED RAB ACCEPTOR 1.B1)                                                           |
| At3g56170            | 17                                    | 0               | CAN (CA-2+ DEPENDENT NUCLEASE); nuclease                                                         |
| At3g56180            | 11                                    | 0               | Unknown protein                                                                                  |
| At3g57060            | 33                                    | 1               | Binding                                                                                          |
| At3g57280            | 14                                    | 0               | Unknown protein                                                                                  |
| At3g57420            | 53                                    | 0               | Unknown protein                                                                                  |
| At3g57550            | 14                                    | 0               | AGK2 (GUANYLATE KINASE); guanylate kinase                                                        |
| At3g58010            | 12                                    | 0               | Unknown protein                                                                                  |
| At3g58110            | 18                                    | 0               | Unknown protein                                                                                  |
| At3g58580            | 23                                    | 0               | Hydrolase                                                                                        |
| At3g58660            | 14                                    | 0               | 60S ribosomal protein-related                                                                    |
| At3g58710            | 20                                    | 0               | WRKY69; transcription factor                                                                     |
| At3g58760            | 11                                    | 0               | Ankyrin protein kinase, putative                                                                 |
| At3g59260            | 17                                    | 0               | Pirin, putative                                                                                  |
| At3g59390            | 12                                    | 0               | Unknown protein                                                                                  |
| At3g59430            | 31                                    | 0               | Unknown protein                                                                                  |
| At3g59630            | 13                                    | 0               | Diphthamide synthesis DPH2 family protein                                                        |
| At3g59660            | 39                                    | 1               | C2 domain-containing protein / GRAM domain-containing protein                                    |
| At3g59960            | 38                                    | 0               | ASHH4 (HISTONE-LYSINE N-METHYLTRANSFERASE ASHH4); histone-lysine N-methyltransferase             |
| At3g60140            | 12                                    | 0               | DIN2 (DARK INDUCIBLE 2); catalytic/ cation binding / hydrolase, hydrolyzing O-glycosyl compounds |
| At3g60500            | 31                                    | 0               | CER7 (ECERIFERUM 7); 3'-5'-exoribonuclease/ RNA binding                                          |
| At3g60520            | 26                                    | 0               | Unknown protein                                                                                  |
| At3g60900            | 50                                    | 0               | FLA10                                                                                            |
| At3g60965            | 27                                    | 1               | Transposable element gene                                                                        |
| At3g61060            | 139                                   | 0               | AtPP2-A13 (Arabidopsis thaliana phloem protein 2-A13); carbohydrate binding                      |
| At3g61070            | 51                                    | 2               | PEX11E                                                                                           |
| At3g61120            | 30                                    | 0               | AGL13 (AGAMOUS-LIKE 13); DNA binding / transcription factor                                      |
| At3g61160            | 33                                    | 0               | Shaggy-related protein kinase beta / ASK-beta (ASK2)                                             |
| At3g61300            | 35                                    | 1               | C2 domain-containing protein                                                                     |

Supplementary Table 4

| GENE ID <sup>a</sup> | Transcriptional activity <sup>b</sup> |                  | PREDICTED FUNCTION <sup>c</sup>                                                                                                                 |
|----------------------|---------------------------------------|------------------|-------------------------------------------------------------------------------------------------------------------------------------------------|
|                      | Wild type ovule                       | <i>sp/ ovule</i> |                                                                                                                                                 |
| At3g61420            | 10                                    | 0                | BSD domain (BTF2-like transcription factors, Synapse-associated proteins and DOS2-like proteins)                                                |
| At3g61570            | 11                                    | 0                | GDAP1 (GRIP-RELATED ARF-BINDING DOMAIN-CONTAINING ARABIDOPSIS PROTEIN 1); protein binding                                                       |
| At3g61710            | 25                                    | 0                | Autophagy protein Apg6 family                                                                                                                   |
| At3g61860            | 43                                    | 1                | RSP31; RNA binding / nucleic acid binding / nucleotide binding                                                                                  |
| At3g62060            | 14                                    | 0                | Pectinacetyltransferase family protein                                                                                                          |
| At3g62310            | 99                                    | 0                | RNA helicase, putative                                                                                                                          |
| At3g62400            | 12                                    | 0                | Unknown protein                                                                                                                                 |
| At3g62420            | 170                                   | 0                | ATBZIP53 (BASIC REGION/LEUCINE ZIPPER MOTIF 53); DNA binding / protein heterodimerization/ sequence-specific DNA binding / transcription factor |
| At3g62860            | 11                                    | 0                | Esterase/lipase/thioesterase family protein                                                                                                     |
| At3g63000            | 40                                    | 0                | NPL41 (NPL4-LIKE PROTEIN 1)                                                                                                                     |
| At3g63010            | 84                                    | 1                | GID1B (GA INSENSITIVE DWARF1B); hydrolase                                                                                                       |
| At3g63440            | 27                                    | 0                | CKX6 (CYTOKININ OXIDASE/DEHYDROGENASE 6); cytokinin dehydrogenase                                                                               |
| At3g63450            | 62                                    | 1                | RNA binding / nucleic acid binding / nucleotide binding                                                                                         |
| At4g00030            | 11                                    | 0                | Plastid-lipid associated protein PAP / fibrillin family protein                                                                                 |
| At4g00120            | 11                                    | 0                | IND (INDEHISCENT); DNA binding / transcription factor                                                                                           |
| At4g00270            | 60                                    | 0                | DNA-binding storekeeper protein-related                                                                                                         |
| At4g00380            | 13                                    | 0                | XH/XS domain-containing protein / XS zinc finger domain-containing protein                                                                      |
| At4g00450            | 27                                    | 0                | CRP (CRYPTIC PRECOCIOUS)                                                                                                                        |
| At4g00467            | 40                                    | 0                | Calcium-dependent lipid-binding (CaLB domain) family protein                                                                                    |
| At4g00905            | 38                                    | 1                | NC domain-containing protein-related                                                                                                            |
| At4g01180            | 11                                    | 0                | XH/XS domain-containing protein                                                                                                                 |
| At4g01200            | 14                                    | 0                | C2 domain-containing protein                                                                                                                    |
| At4g01250            | 22                                    | 0                | WRKY22; transcription factor                                                                                                                    |
| At4g01710            | 49                                    | 1                | CRK (CROOKED); actin binding                                                                                                                    |
| At4g01897            | 30                                    | 0                | Unknown protein                                                                                                                                 |
| At4g02040            | 25                                    | 0                | Unknown protein                                                                                                                                 |
| At4g02060            | 82                                    | 1                | PRL (PROLIFERA); ATP binding / DNA binding / DNA-dependent ATPase/ nucleoside-triphosphatase/ nucleotide binding                                |
| At4g02200            | 14                                    | 0                | Drought-responsive family protein                                                                                                               |
| At4g02250            | 22                                    | 0                | invertase/pectin methylesterase inhibitor family protein                                                                                        |
| At4g02400            | 25                                    | 0                | U3 ribonucleoprotein (Utp) family protein                                                                                                       |
| At4g02440            | 38                                    | 1                | EID1 (EMPFINDLICHER IM DUNKELROTEN LICHT 1); ubiquitin-protein ligase                                                                           |
| At4g02630            | 10                                    | 0                | Protein kinase family protein                                                                                                                   |
| At4g02650            | 100                                   | 0                | Epsin N-terminal homology (ENTH) domain-containing protein / clathrin assembly protein-related                                                  |
| At4g02655            | 100                                   | 0                | Unknown protein                                                                                                                                 |
| At4g02800            | 11                                    | 0                | Unknown protein                                                                                                                                 |



Supplementary Table 4

| GENE ID <sup>a</sup> | Transcriptional activity <sup>b</sup> |                  | PREDICTED FUNCTION <sup>c</sup>                                                                                                                                   |
|----------------------|---------------------------------------|------------------|-------------------------------------------------------------------------------------------------------------------------------------------------------------------|
|                      | Wild type ovule                       | <i>sp/ ovule</i> |                                                                                                                                                                   |
| At4g02840            | 53                                    | 0                | Small nuclear ribonucleoprotein D1, putative / snRNP core protein D1, putative / Sm protein D1, putative                                                          |
| At4g02940            | 11                                    | 0                | Oxidoreductase, 2OG-Fe(II) oxygenase family protein                                                                                                               |
| At4g03140            | 22                                    | 0                | Binding / catalytic/ oxidoreductase                                                                                                                               |
| At4g03230            | 22                                    | 0                | ATP binding / kinase/ protein kinase/ protein serine/threonine kinase/ protein tyrosine kinase/ sugar binding                                                     |
| At4g03240            | 17                                    | 0                | FH (FRATAIXIN HOMOLOG)                                                                                                                                            |
| At4g03960            | 11                                    | 0                | Tyrosine specific protein phosphatase family protein                                                                                                              |
| At4g04320            | 9                                     | 0                | Malonyl-CoA decarboxylase family protein                                                                                                                          |
| At4g04610            | 59                                    | 1                | APR1 (APS REDUCTASE 1); adenylyl-sulfate reductase                                                                                                                |
| At4g04670            | 53                                    | 2                | Met-10+ like family protein / kelch repeat-containing protein                                                                                                     |
| At4g04870            | 60                                    | 0                | CLS (CARDIOLIPIN SYNTHASE); cardiolipin synthase/ phosphatidyltransferase                                                                                         |
| At4g05020            | 45                                    | 0                | NDB2 (NAD(P)H dehydrogenase B2); FAD binding / disulfide oxidoreductase/ oxidoreductase                                                                           |
| At4g05410            | 64                                    | 2                | Transducin family protein / WD-40 repeat family protein                                                                                                           |
| At4g07390            | 49                                    | 0                | PQ-loop repeat family protein / transmembrane family protein                                                                                                      |
| At4g08240            | 11                                    | 0                | Unknown protein                                                                                                                                                   |
| At4g08690            | 14                                    | 0                | SEC14 cytosolic factor family protein / phosphoglyceride transfer family protein                                                                                  |
| At4g08810            | 94                                    | 2                | SUB1; calcium ion binding                                                                                                                                         |
| At4g08980            | 12                                    | 0                | F-box family protein (FBW2)                                                                                                                                       |
| At4g09153            | 33                                    | 0                | LCR36 (Low-molecular-weight cysteine-rich 36)                                                                                                                     |
| At4g09530            | 19                                    | 0                | Auxin-responsive family protein                                                                                                                                   |
| At4g10040            | 11                                    | 0                | CYTC-2 (cytochrome c-2); electron carrier/ heme binding / iron ion binding                                                                                        |
| At4g10650            | 21                                    | 0                | GTP binding                                                                                                                                                       |
| At4g10710            | 85                                    | 0                | SPT16 (global transcription factor C)                                                                                                                             |
| At4g11060            | 32                                    | 0                | MTSSB (mitochondrially targeted single-stranded DNA binding protein); single-stranded DNA binding                                                                 |
| At4g11090            | 60                                    | 0                | Unknown protein                                                                                                                                                   |
| At4g11330            | 16                                    | 0                | ATMPK5 (MAP KINASE 5); MAP kinase/ kinase                                                                                                                         |
| At4g11570            | 17                                    | 0                | Haloacid dehalogenase-like hydrolase family protein                                                                                                               |
| At4g11760            | 57                                    | 0                | LCR17 (Low-molecular-weight cysteine-rich 17)                                                                                                                     |
| At4g11790            | 43                                    | 0                | Ran-binding protein 1 domain-containing protein / RanBP1 domain-containing protein                                                                                |
| At4g11800            | 30                                    | 1                | Hydrolase/ protein serine/threonine phosphatase                                                                                                                   |
| At4g11960            | 17                                    | 0                | PGRL1B (PGR5-Like B)                                                                                                                                              |
| At4g11980            | 21                                    | 0                | ATNUDX14 (ARABIDOPSIS THALIANA NUDIX HYDROLASE HOMOLOG 14); ADP-glucose pyrophosphohydrolase/ ADP-ribose pyrophosphohydrolase/ ADP-sugar diphosphatase/ hydrolase |
| At4g12130            | 33                                    | 0                | Aminomethyltransferase                                                                                                                                            |
| At4g12340            | 28                                    | 1                | Copper ion binding                                                                                                                                                |
| At4g12650            | 69                                    | 0                | Endomembrane protein 70 protein family                                                                                                                            |
| At4g12860            | 18                                    | 0                | UNE14 (unfertilized embryo sac 14); calcium ion binding                                                                                                           |

Supplementary Table 4

| GENE ID <sup>a</sup> | Transcriptional activity <sup>b</sup> |                  | PREDICTED FUNCTION <sup>c</sup>                                                                                                  |
|----------------------|---------------------------------------|------------------|----------------------------------------------------------------------------------------------------------------------------------|
|                      | Wild type ovule                       | <i>sp/ ovule</i> |                                                                                                                                  |
| At4g13230            | 11                                    | 0                | Late embryogenesis abundant domain-containing protein / LEA domain-containing protein                                            |
| At4g13270            | 19                                    | 0                | Unknown protein                                                                                                                  |
| At4g13690            | 45                                    | 0                | Unknown protein                                                                                                                  |
| At4g13780            | 52                                    | 1                | Methionine--tRNA ligase, putative / methionyl-tRNA synthetase, putative / MetRS, putative                                        |
| At4g14070            | 9                                     | 0                | AAE15 (acyl-activating enzyme 15); long-chain-fatty-acid-[acyl-carrier-protein] ligase                                           |
| At4g14110            | 10                                    | 0                | COP9 (CONSTITUTIVE PHOTOMORPHOGENIC 9); metalloendopeptidase/ protein binding                                                    |
| At4g14210            | 29                                    | 1                | PDS3 (PHYTOENE DESATURASE 3); phytoene dehydrogenase                                                                             |
| At4g14340            | 11                                    | 0                | CKII (CASEIN KINASE I); kinase/ protein serine/threonine kinase                                                                  |
| At4g14342            | 27                                    | 0                | pre-mRNA splicing factor 10 kDa subunit, putative                                                                                |
| At4g14570            | 59                                    | 0                | Acylaminoacyl-peptidase-related                                                                                                  |
| At4g14760            | 122                                   | 2                | Kinase interacting (KIP1-like) family protein                                                                                    |
| At4g14900            | 21                                    | 0                | Hydroxyproline-rich glycoprotein family protein                                                                                  |
| At4g14950            | 81                                    | 0                | Unknown protein                                                                                                                  |
| At4g14960            | 28                                    | 0                | TUA6; structural constituent of cytoskeleton                                                                                     |
| At4g15010            | 34                                    | 0                | Mitochondrial substrate carrier family protein                                                                                   |
| At4g15640            | 14                                    | 0                | Unknown protein                                                                                                                  |
| At4g15750            | 28                                    | 0                | invertase/pectin methylesterase inhibitor family protein                                                                         |
| At4g15885            | 18                                    | 0                | Kinesin motor protein-related                                                                                                    |
| At4g15940            | 65                                    | 2                | Fumarylacetoacetate hydrolase family protein                                                                                     |
| At4g15955            | 43                                    | 0                | Epoxide hydrolase-related                                                                                                        |
| At4g16155            | 28                                    | 0                | Dihydrolipoyl dehydrogenase                                                                                                      |
| At4g16480            | 38                                    | 0                | INT4 (INOSITOL TRANSPORTER 4); carbohydrate transmembrane transporter/ myo-inositol:hydrogen symporter/ sugar:hydrogen symporter |
| At4g16515            | 14                                    | 0                | Unknown protein                                                                                                                  |
| At4g16570            | 50                                    | 2                | PRMT7 (PROTEIN ARGININE METHYLTRANSFERASE 7); methyltransferase                                                                  |
| At4g16640            | 18                                    | 0                | Matrix metalloproteinase, putative                                                                                               |
| At4g16710            | 29                                    | 0                | Glycosyltransferase family protein 28                                                                                            |
| At4g16980            | 13                                    | 0                | Arabinogalactan-protein family                                                                                                   |
| At4g17180            | 12                                    | 0                | Glycosyl hydrolase family 17 protein                                                                                             |
| At4g17270            | 9                                     | 0                | Mo25 family protein                                                                                                              |
| At4g17695            | 12                                    | 0                | KAN3 (KANADI 3); DNA binding / transcription factor                                                                              |
| At4g18060            | 70                                    | 0                | Clathrin binding                                                                                                                 |
| At4g18375            | 45                                    | 0                | KH domain-containing protein                                                                                                     |
| At4g18970            | 79                                    | 3                | GDSL-motif lipase/hydrolase family protein                                                                                       |
| At4g19020            | 30                                    | 1                | CMT2 (chromomethylase 2); DNA binding / chromatin binding                                                                        |
| At4g19090            | 23                                    | 0                | Unknown protein                                                                                                                  |
| At4g19185            | 45                                    | 0                | Integral membrane family protein                                                                                                 |

Supplementary Table 4

| GENE ID <sup>a</sup> | Transcriptional activity <sup>b</sup> |                   | PREDICTED FUNCTION <sup>c</sup>                                                                                               |
|----------------------|---------------------------------------|-------------------|-------------------------------------------------------------------------------------------------------------------------------|
|                      | Wild type ovule                       | <i>sp</i> / ovule |                                                                                                                               |
| At4g19191            | 31                                    | 0                 | Pentatricopeptide (PPR) repeat-containing protein                                                                             |
| At4g19220            | 18                                    | 0                 | Pentatricopeptide (PPR) repeat-containing protein                                                                             |
| At4g19400            | 25                                    | 1                 | Actin binding                                                                                                                 |
| At4g19490            | 35                                    | 1                 | Protein binding                                                                                                               |
| At4g19870            | 25                                    | 0                 | Kelch repeat-containing F-box family protein                                                                                  |
| At4g20130            | 120                                   | 2                 | PTAC14 (PLASTID TRANSCRIPTIONALLY ACTIVE14)                                                                                   |
| At4g20150            | 246                                   | 0                 | Unknown protein                                                                                                               |
| At4g20362            | 11                                    | 0                 | other RNA                                                                                                                     |
| At4g20410            | 29                                    | 0                 | GSNAP (GAMMA-SOLUBLE NSF ATTACHMENT PROTEIN); binding / transporter                                                           |
| At4g20820            | 15                                    | 0                 | FAD-binding domain-containing protein                                                                                         |
| At4g21150            | 42                                    | 1                 | HAP6 (HAPLESS 6); dolichyl-diphosphooligosaccharide-protein glycotransferase                                                  |
| At4g21170            | 15                                    | 0                 | Pentatricopeptide (PPR) repeat-containing protein                                                                             |
| At4g21350            | 14                                    | 0                 | PUB8 (PLANT U-BOX 8); binding / protein binding / ubiquitin-protein ligase/ zinc ion binding                                  |
| At4g21610            | 37                                    | 1                 | LOL2 (LSD ONE LIKE 2); transcription factor                                                                                   |
| At4g21630            | 77                                    | 0                 | Subtilase family protein                                                                                                      |
| At4g21710            | 66                                    | 0                 | NRPB2; DNA binding / DNA-directed RNA polymerase                                                                              |
| At4g21730            | 26                                    | 0                 | Pseudogene of N-ethylmaleimide sensitive factor (NSF)                                                                         |
| At4g21790            | 120                                   | 1                 | TOM1 (TOBAMOVIRUS MULTIPLICATION 1); protein binding                                                                          |
| At4g21880            | 9                                     | 0                 | Pentatricopeptide (PPR) repeat superfamily-protein                                                                            |
| At4g22105            | 84                                    | 0                 | SCRL26 (SCR-Like 26)                                                                                                          |
| At4g22200            | 9                                     | 0                 | AKT2/3 (ARABIDOPSIS POTASSIUM TRANSPORT 2/3); cyclic nucleotide binding / inward rectifier potassium channel/ protein binding |
| At4g22280            | 12                                    | 0                 | F-box family protein                                                                                                          |
| At4g22390            | 30                                    | 0                 | F-box associated ubiquitination effector family protein                                                                       |
| At4g22830            | 9                                     | 0                 | Unknown protein                                                                                                               |
| At4g23400            | 9                                     | 0                 | PIP1;5 (PLASMA MEMBRANE INTRINSIC PROTEIN 1;5); water channel                                                                 |
| At4g23520            | 10                                    | 0                 | Cysteine proteinase, putative                                                                                                 |
| At4g23530            | 13                                    | 0                 | Unknown protein                                                                                                               |
| At4g23740            | 12                                    | 0                 | Lleucine-rich repeat transmembrane protein kinase, putative                                                                   |
| At4g23940            | 23                                    | 0                 | FtsH protease, putative                                                                                                       |
| At4g23960            | 19                                    | 0                 | F-box family protein                                                                                                          |
| At4g24080            | 15                                    | 0                 | ALL1 (Aldolase like); carbon-carbon lyase/ catalytic                                                                          |
| At4g24750            | 24                                    | 0                 | Rhodanese/Cell cycle control phosphatase superfamily protein                                                                  |
| At4g25120            | 33                                    | 0                 | ATP binding / ATP-dependent DNA helicase/ DNA binding / hydrolase                                                             |
| At4g25520            | 9                                     | 0                 | SLK1 (SEUSS-LIKE 1); transcription regulator                                                                                  |
| At4g25570            | 70                                    | 1                 | ACYB-2; carbon-monoxide oxygenase                                                                                             |

Supplementary Table 4

| GENE ID <sup>a</sup> | Transcriptional activity <sup>b</sup> |                  | PREDICTED FUNCTION <sup>c</sup>                                                                                    |
|----------------------|---------------------------------------|------------------|--------------------------------------------------------------------------------------------------------------------|
|                      | Wild type ovule                       | <i>sp/ ovule</i> |                                                                                                                    |
| At4g25700            | 49                                    | 1                | BETA-OHASE 1 (BETA-HYDROXYLASE 1); carotene beta-ring hydroxylase                                                  |
| At4g25770            | 21                                    | 0                | Unknown protein                                                                                                    |
| At4g25840            | 11                                    | 0                | GPP1 (glycerol-3-phosphatase 1); catalytic/ hydrolase                                                              |
| At4g25850            | 9                                     | 0                | ORP4B (OSBP(OXYSTEROL BINDING PROTEIN)-RELATED PROTEIN 4B); oxysterol binding                                      |
| At4g26070            | 11                                    | 0                | MEK1 (MAP KINASE/ ERK KINASE 1); MAP kinase kinase/ kinase/ protein binding                                        |
| At4g26180            | 9                                     | 0                | Mitochondrial substrate carrier family protein                                                                     |
| At4g26500            | 30                                    | 1                | CPSUFE (CHLOROPLAST SULFUR E); enzyme activator/ transcription regulator                                           |
| At4g26550            | 22                                    | 0                | Got1/Sft2-like vesicle transport protein family                                                                    |
| At4g26610            | 19                                    | 0                | D6PKL1 (D6 PROTEIN KINASE LIKE 1); kinase                                                                          |
| At4g26640            | 17                                    | 0                | WRKY20; transcription factor                                                                                       |
| At4g26660            | 23                                    | 0                | Unknown function                                                                                                   |
| At4g27090            | 46                                    | 1                | 60S ribosomal protein L14 (RPL14B)                                                                                 |
| At4g27270            | 21                                    | 0                | Quinone reductase family protein                                                                                   |
| At4g27280            | 53                                    | 0                | Calcium-binding EF hand family protein                                                                             |
| At4g27350            | 14                                    | 0                | Unknown protein                                                                                                    |
| At4g27540            | 27                                    | 0                | PRA1.H (PRENYLATED RAB ACCEPTOR 1.H)                                                                               |
| At4g27580            | 20                                    | 0                | Unknown protein                                                                                                    |
| At4g27654            | 33                                    | 1                | Unknown protein                                                                                                    |
| At4g27660            | 36                                    | 0                | Unknown protein                                                                                                    |
| At4g28010            | 14                                    | 0                | Pentatricopeptide (PPR) repeat-containing protein                                                                  |
| At4g28020            | 95                                    | 0                | Unknown protein                                                                                                    |
| At4g28290            | 12                                    | 0                | Unknown protein                                                                                                    |
| At4g28610            | 186                                   | 2                | PHR1 (PHOSPHATE STARVATION RESPONSE 1); transcription factor                                                       |
| At4g28630            | 22                                    | 0                | ATM1 (ABC TRANSPORTER OF THE MITOCHONDRION); ATPase, coupled to transmembrane movement of substances / transporter |
| At4g28730            | 25                                    | 0                | Glutaredoxin family protein                                                                                        |
| At4g28775            | 30                                    | 0                | Unknown protein                                                                                                    |
| At4g28950            | 14                                    | 0                | ROP9 (RHO-RELATED PROTEIN FROM PLANTS 9); GTP binding                                                              |
| At4g29100            | 23                                    | 0                | Ethylene-responsive family protein                                                                                 |
| At4g29160            | 41                                    | 1                | SNF7.1                                                                                                             |
| At4g29340            | 19                                    | 0                | PRF4 (PROFILIN 4); actin binding                                                                                   |
| At4g29735            | 245                                   | 5                | Unknown protein                                                                                                    |
| At4g29810            | 28                                    | 0                | ATMCK2 (ARABIDOPSIS THALIANA MAP KINASE KINASE 2); MAP kinase kinase/ kinase                                       |
| At4g29960            | 14                                    | 0                | Unknown protein                                                                                                    |
| At4g29990            | 11                                    | 0                | Light repressible receptor protein kinase                                                                          |

Supplementary Table 4

| GENE ID <sup>a</sup> | Transcriptional activity <sup>b</sup> |                  | PREDICTED FUNCTION <sup>c</sup>                                                            |
|----------------------|---------------------------------------|------------------|--------------------------------------------------------------------------------------------|
|                      | Wild type ovule                       | <i>sp/ ovule</i> |                                                                                            |
| At4g30190            | 9                                     | 0                | AHA2; ATPase/ hydrogen-exporting ATPase, phosphorylative mechanism                         |
| At4g30220            | 36                                    | 1                | RUXF (SMALL NUCLEAR RIBONUCLEOPROTEIN F)                                                   |
| At4g30360            | 12                                    | 0                | ATCNGC17; calmodulin binding / cyclic nucleotide binding / ion channel                     |
| At4g30430            | 10                                    | 0                | TET9 (TETRASPANIN9)                                                                        |
| At4g30600            | 49                                    | 1                | Signal recognition particle receptor alpha subunit family protein                          |
| At4g30610            | 25                                    | 0                | BRS1 (BRI1 SUPPRESSOR 1); serine-type carboxypeptidase                                     |
| At4g30662            | 39                                    | 0                | Unknown protein                                                                            |
| At4g30970            | 19                                    | 0                | Unknown protein                                                                            |
| At4g31010            | 20                                    | 0                | RNA binding                                                                                |
| At4g31040            | 10                                    | 0                | Proton extrusion protein-related                                                           |
| At4g31600            | 21                                    | 0                | UDP-glucuronic acid/UDP-N-acetylgalactosamine transporter-related                          |
| At4g31650            | 15                                    | 0                | Transcriptional factor B3 family protein                                                   |
| At4g31750            | 22                                    | 0                | WIN2 (HOPW1-1-INTERACTING 2); protein serine/threonine phosphatase                         |
| At4g31820            | 71                                    | 0                | ENP (ENHANCER OF PINOID); protein binding / signal transducer                              |
| At4g32130            | 12                                    | 0                | Carbohydrate binding                                                                       |
| At4g32170            | 14                                    | 0                | CYP96A2; electron carrier/ heme binding / iron ion binding / monooxygenase/ oxygen binding |
| At4g32190            | 34                                    | 1                | Centromeric protein-related                                                                |
| At4g32490            | 10                                    | 0                | Plastocyanin-like domain-containing protein                                                |
| At4g32530            | 69                                    | 0                | Vacuolar ATP synthase, putative / V-atpase, putative                                       |
| At4g32590            | 30                                    | 0                | Ferredoxin-related                                                                         |
| At4g32600            | 35                                    | 1                | Zinc finger (C3HC4-type RING finger) family protein                                        |
| At4g33460            | 9                                     | 0                | ATNAP13; transporter                                                                       |
| At4g33490            | 11                                    | 0                | Apartic-type endopeptidase                                                                 |
| At4g33630            | 12                                    | 0                | EX1 (EXECUTER1)                                                                            |
| At4g34090            | 39                                    | 0                | Unknown protein                                                                            |
| At4g34180            | 42                                    | 0                | Cyclase family protein                                                                     |
| At4g34480            | 9                                     | 0                | Catalytic/ cation binding / hydrolase, hydrolyzing O-glycosyl compounds                    |
| At4g34870            | 107                                   | 1                | ROC5 (ROTAMASE CYCLOPHILIN 5); peptidyl-prolyl cis-trans isomerase                         |
| At4g35020            | 20                                    | 0                | ARAC3 (ARABIDOPSIS RAC-LIKE 3); GTP binding / GTPase                                       |
| At4g35335            | 17                                    | 0                | Nucleotide-sugar transmembrane transporter/ sugar:hydrogen symporter                       |
| At4g35770            | 202                                   | 0                | SEN1 (SENESCENCE 1)                                                                        |
| At4g35785            | 12                                    | 0                | Nucleic acid binding / nucleotide binding                                                  |
| At4g35800            | 26                                    | 1                | NRPB1 (RNA POLYMERASE II LARGE SUBUNIT); DNA binding / DNA-directed RNA polymerase         |
| At4g35840            | 27                                    | 0                | Zinc finger (C3HC4-type RING finger) family protein                                        |
| At4g36240            | 45                                    | 0                | Zinc finger (GATA type) family protein                                                     |
| At4g36280            | 35                                    | 0                | ATP-binding region, ATPase-like domain-containing protein                                  |

Supplementary Table 4

| GENE ID <sup>a</sup> | Transcriptional activity <sup>b</sup> |                  | PREDICTED FUNCTION <sup>c</sup>                                                                                                   |
|----------------------|---------------------------------------|------------------|-----------------------------------------------------------------------------------------------------------------------------------|
|                      | Wild type ovule                       | <i>sp/ ovule</i> |                                                                                                                                   |
| At4g36470            | 11                                    | 0                | S-adenosyl-L-methionine:carboxyl methyltransferase family protein                                                                 |
| At4g36940            | 43                                    | 0                | NAPRT1 (NICOTINATE PHOSPHORIBOSYLTRANSFERASE 1); nicotinate phosphoribosyltransferase                                             |
| At4g37445            | 11                                    | 0                | BEST Arabidopsis thaliana protein match is: calcium-binding EF hand family protein                                                |
| At4g37460            | 36                                    | 1                | SRFR1 (SUPPRESSOR OF RPS4-RLD 1); protein complex scaffold                                                                        |
| At4g37800            | 11                                    | 0                | Xyloglucan:xyloglucosyl transferase, putative / xyloglucan endotransglycosylase, putative / endo-xyloglucan transferase, putative |
| At4g38090            | 25                                    | 0                | Unknown protein                                                                                                                   |
| At4g38150            | 28                                    | 0                | Pentatricopeptide (PPR) repeat-containing protein                                                                                 |
| At4g38230            | 14                                    | 0                | CPK26; ATP binding / calcium ion binding / calmodulin-dependent protein kinase/ kinase/ protein kinase                            |
| At4g38360            | 24                                    | 0                | Unknown protein                                                                                                                   |
| At4g38380            | 10                                    | 0                | Antiporter/ drug transporter                                                                                                      |
| At4g38470            | 28                                    | 1                | Protein kinase family protein                                                                                                     |
| At4g38520            | 58                                    | 0                | Protein phosphatase 2C family protein / PP2C family protein                                                                       |
| At4g38650            | 14                                    | 0                | Glycosyl hydrolase family 10 protein                                                                                              |
| At4g38790            | 27                                    | 0                | ER lumen protein retaining receptor family protein                                                                                |
| At4g38800            | 40                                    | 0                | ATMTN1; catalytic/ methylthioadenosine nucleosidase                                                                               |
| At4g39550            | 36                                    | 0                | Kelch repeat-containing F-box family protein                                                                                      |
| At4g39780            | 11                                    | 0                | AP2 domain-containing transcription factor, putative                                                                              |
| At4g39800            | 19                                    | 0                | MIPS1 (MYO-INOSITOL-1-PHOSTPATE SYNTHASE 1); inositol-3-phosphate synthase                                                        |
| At4g39865            | 11                                    | 0                | pre-tRNA                                                                                                                          |
| At4g39890            | 17                                    | 0                | AtRABH1c (Arabidopsis Rab GTPase homolog H1c); GTP binding / protein binding                                                      |
| At5g01075            | 9                                     | 0                | Beta-galactosidase                                                                                                                |
| At5g01370            | 26                                    | 0                | Unknown protein                                                                                                                   |
| At5g01650            | 18                                    | 0                | Macrophage migration inhibitory factor family protein / MIF family protein                                                        |
| At5g01800            | 9                                     | 0                | Saposin B domain-containing protein                                                                                               |
| At5g01810            | 12                                    | 0                | CIPK15 (CBL-INTERACTING PROTEIN KINASE 15); kinase/ protein kinase                                                                |
| At5g01860            | 25                                    | 0                | Zinc finger (C2H2 type) family protein                                                                                            |
| At5g02180            | 20                                    | 0                | Amino acid transporter family protein                                                                                             |
| At5g02410            | 25                                    | 1                | DIE2/ALG10 family                                                                                                                 |
| At5g02560            | 13                                    | 0                | HTA12; DNA binding                                                                                                                |
| At5g02850            | 18                                    | 0                | Hydroxyproline-rich glycoprotein family protein                                                                                   |
| At5g02950            | 61                                    | 2                | PWWP domain-containing protein                                                                                                    |
| At5g03070            | 45                                    | 0                | IMPA-9 (IMPORTIN ALPHA ISOFORM 9); binding                                                                                        |
| At5g03320            | 18                                    | 0                | Protein kinase, putative                                                                                                          |
| At5g03330            | 29                                    | 0                | OTU-like cysteine protease family protein                                                                                         |
| At5g03520            | 40                                    | 0                | ATRAB8C; GTP binding                                                                                                              |

Supplementary Table 4

| GENE ID <sup>a</sup> | Transcriptional activity <sup>b</sup> |                  | PREDICTED FUNCTION <sup>c</sup>                                                                                                                                           |
|----------------------|---------------------------------------|------------------|---------------------------------------------------------------------------------------------------------------------------------------------------------------------------|
|                      | Wild type ovule                       | <i>sp/ ovule</i> |                                                                                                                                                                           |
| At5g04770            | 10                                    | 0                | CAT6 (CATIONIC AMINO ACID TRANSPORTER 6); amino acid transmembrane transporter/ basic amino acid transmembrane transporter/ cationic amino acid transmembrane transporter |
| At5g04930            | 63                                    | 1                | ALA1 (aminophospholipid ATPase1); ATPase, coupled to transmembrane movement of ions, phosphorylative mechanism                                                            |
| At5g05090            | 25                                    | 0                | Myb family transcription factor                                                                                                                                           |
| At5g05100            | 74                                    | 0                | Nucleic acid binding                                                                                                                                                      |
| At5g05365            | 38                                    | 0                | Metal ion binding                                                                                                                                                         |
| At5g05760            | 42                                    | 0                | SYP31 (SYNTAXIN OF PLANTS 31); SNAP receptor                                                                                                                              |
| At5g06220            | 34                                    | 1                | LETM1-like protein                                                                                                                                                        |
| At5g06310            | 27                                    | 0                | AtPOT1b (protection of telomeres 1b); DNA binding                                                                                                                         |
| At5g06350            | 11                                    | 0                | Binding                                                                                                                                                                   |
| At5g06660            | 10                                    | 0                | Unknown protein                                                                                                                                                           |
| At5g06810            | 10                                    | 0                | Mitochondrial transcription termination factor-related / mTERF-related                                                                                                    |
| At5g06870            | 36                                    | 0                | PGIP2 (POLYGALACTURONASE INHIBITING PROTEIN 2); protein binding                                                                                                           |
| At5g07350            | 73                                    | 0                | Tudor domain-containing protein / nuclease family protein                                                                                                                 |
| At5g07710            | 24                                    | 0                | Exonuclease family protein                                                                                                                                                |
| At5g07810            | 22                                    | 0                | SNF2 domain-containing protein / helicase domain-containing protein / HNH endonuclease domain-containing protein                                                          |
| At5g07910            | 55                                    | 0                | Leucine-rich repeat family protein                                                                                                                                        |
| At5g07950            | 28                                    | 0                | Unknown protein                                                                                                                                                           |
| At5g07960            | 76                                    | 0                | Unknown protein                                                                                                                                                           |
| At5g08090            | 9                                     | 0                | Unknown protein                                                                                                                                                           |
| At5g08100            | 84                                    | 0                | L-asparaginase / L-asparagine amidohydrolase                                                                                                                              |
| At5g08120            | 22                                    | 0                | MBP2C (MICROTUBULE BINDING PROTEIN 2C); protein binding                                                                                                                   |
| At5g08340            | 30                                    | 0                | Riboflavin biosynthesis protein-related                                                                                                                                   |
| At5g08350            | 53                                    | 0                | GRAM domain-containing protein / ABA-responsive protein-related                                                                                                           |
| At5g08565            | 39                                    | 0                | Positive transcription elongation factor/ zinc ion binding                                                                                                                |
| At5g08710            | 15                                    | 0                | Regulator of chromosome condensation (RCC1) family protein / UVB-resistance protein-related                                                                               |
| At5g08720            | 9                                     | 0                | BEST Arabidopsis thaliana protein match is: Polyketide cyclase / dehydrase and lipid transport protein                                                                    |
| At5g09260            | 12                                    | 0                | VPS20.2 (VACUOLAR PROTEIN SORTING-ASSOCIATED PROTEIN 20.2)                                                                                                                |
| At5g09580            | 21                                    | 0                | Unknown protein                                                                                                                                                           |
| At5g10290            | 9                                     | 0                | Leucine-rich repeat family protein / protein kinase family protein                                                                                                        |
| At5g10620            | 11                                    | 0                | Methyltransferases                                                                                                                                                        |
| At5g10630            | 9                                     | 0                | Elongation factor 1-alpha, putative / EF-1-alpha, putative                                                                                                                |
| At5g10790            | 14                                    | 0                | UBP22 (UBIQUITIN-SPECIFIC PROTEASE 22); ubiquitin thiolesterase/ ubiquitin-specific protease/ zinc ion binding                                                            |
| At5g10910            | 18                                    | 0                | mraW methylase family protein                                                                                                                                             |

Supplementary Table 4

| GENE ID <sup>a</sup> | Transcriptional activity <sup>b</sup> |                  | PREDICTED FUNCTION <sup>c</sup>                                                                                                         |
|----------------------|---------------------------------------|------------------|-----------------------------------------------------------------------------------------------------------------------------------------|
|                      | Wild type ovule                       | <i>sp/ ovule</i> |                                                                                                                                         |
| At5g11020            | 15                                    | 0                | ATP binding / kinase/ protein kinase/ protein serine/threonine kinase/ protein tyrosine kinase                                          |
| At5g11180            | 24                                    | 0                | ATGLR2.6; intracellular ligand-gated ion channel                                                                                        |
| At5g11380            | 16                                    | 0                | DXPS3 (1-deoxy-D-xylulose 5-phosphate synthase 3); 1-deoxy-D-xylulose-5-phosphate synthase                                              |
| At5g11490            | 17                                    | 0                | Adaptin family protein                                                                                                                  |
| At5g11810            | 23                                    | 0                | Unknown protein                                                                                                                         |
| At5g11870            | 12                                    | 0                | Alkaline phytoceramidase (aPHC)                                                                                                         |
| At5g12290            | 9                                     | 0                | DGS1 (DGD1 SUPPRESSOR 1)                                                                                                                |
| At5g12380            | 58                                    | 0                | Annexin, putative                                                                                                                       |
| At5g12970            | 14                                    | 0                | C2 domain-containing protein                                                                                                            |
| At5g13150            | 27                                    | 0                | ATEXO70C1 (exocyst subunit EXO70 family protein C1); protein binding                                                                    |
| At5g13200            | 29                                    | 0                | GRAM domain-containing protein / ABA-responsive protein-related                                                                         |
| At5g13440            | 26                                    | 0                | Ubiquinol-cytochrome C reductase iron-sulfur subunit, mitochondrial, putative / Rieske iron-sulfur protein, putative                    |
| At5g13490            | 193                                   | 7                | Encodes mitochondrial ADP/ATP carrier                                                                                                   |
| At5g13650            | 26                                    | 0                | Elongation factor family protein                                                                                                        |
| At5g13710            | 16                                    | 0                | SMT1 (STEROL METHYLTRANSFERASE 1); sterol 24-C-methyltransferase                                                                        |
| At5g13770            | 22                                    | 0                | Pentatricopeptide (PPR) repeat-containing protein                                                                                       |
| At5g13790            | 13                                    | 0                | AGL15 (AGAMOUS-LIKE 15); DNA binding / transcription factor                                                                             |
| At5g13860            | 30                                    | 0                | ELC-Like (ELCH-like); small conjugating protein ligase                                                                                  |
| At5g14280            | 9                                     | 0                | DNA-binding storekeeper protein-related                                                                                                 |
| At5g14500            | 15                                    | 0                | Aldose 1-epimerase family protein                                                                                                       |
| At5g14860            | 18                                    | 0                | Transferase, transferring glycosyl groups                                                                                               |
| At5g14910            | 11                                    | 0                | Heavy-metal-associated domain-containing protein                                                                                        |
| At5g15260            | 97                                    | 3                | Structural constituent of ribosome                                                                                                      |
| At5g15760            | 25                                    | 0                | Plastid-specific 30S ribosomal protein 3, putative / PSRP-3, putative                                                                   |
| At5g15770            | 23                                    | 0                | AtGNA1 (Arabidopsis thaliana glucose-6-phosphate acetyltransferase 1); N-acetyltransferase/ glucosamine 6-phosphate N-acetyltransferase |
| At5g15810            | 15                                    | 0                | N2,N2-dimethylguanosine tRNA methyltransferase family protein                                                                           |
| At5g15860            | 13                                    | 0                | ATPCME (PRENYLCYSTEINE METHYLESTERASE); prenylcysteine methylesterase                                                                   |
| At5g16250            | 47                                    | 0                | Unknown protein                                                                                                                         |
| At5g16260            | 9                                     | 0                | RNA recognition motif (RRM)-containing protein                                                                                          |
| At5g16390            | 25                                    | 0                | CAC1 (CHLOROPLASTIC ACETYLCOENZYME CARBOXYLASE 1); acetyl-CoA carboxylase/ biotin binding                                               |
| At5g16500            | 14                                    | 0                | Protein kinase family protein                                                                                                           |
| At5g16560            | 9                                     | 0                | KAN (KANADI); transcription factor                                                                                                      |
| At5g16660            | 35                                    | 0                | Unknown protein                                                                                                                         |
| At5g16720            | 29                                    | 0                | Unknown protein                                                                                                                         |



Supplementary Table 4

| GENE ID <sup>a</sup> | Transcriptional activity <sup>b</sup> |                  | PREDICTED FUNCTION <sup>c</sup>                                                                                                                  |
|----------------------|---------------------------------------|------------------|--------------------------------------------------------------------------------------------------------------------------------------------------|
|                      | Wild type ovule                       | <i>sp/ ovule</i> |                                                                                                                                                  |
| At5g16820            | 37                                    | 1                | HSF3 (HEAT SHOCK FACTOR 3); DNA binding / transcription factor                                                                                   |
| At5g17090            | 26                                    | 1                | Cystatin/monellin superfamily protein                                                                                                            |
| At5g17210            | 126                                   | 2                | Unknown protein                                                                                                                                  |
| At5g17300            | 33                                    | 0                | Myb family transcription factor                                                                                                                  |
| At5g17710            | 32                                    | 0                | EMB1241 (embryo defective 1241); adenylyl-nucleotide exchange factor/ chaperone binding / protein binding / protein homodimerization             |
| At5g17770            | 13                                    | 0                | ATCBR (ARABIDOPSIS THALIANA NADH:CYTOCHROME B5 REDUCTASE 1); cytochrome-b5 reductase                                                             |
| At5g17790            | 25                                    | 0                | VAR3 (VARIEGATED 3); binding / zinc ion binding                                                                                                  |
| At5g18220            | 18                                    | 0                | Glycosyl hydrolase family 17 protein                                                                                                             |
| At5g18255            | 72                                    | 2                | other RNA                                                                                                                                        |
| At5g18440            | 11                                    | 0                | Unknown protein                                                                                                                                  |
| At5g18480            | 24                                    | 0                | PGSIP6 (PLANT GLYCOGENIN-LIKE STARCH INITIATION PROTEIN 6); transferase, transferring glycosyl groups / transferase, transferring hexosyl groups |
| At5g18630            | 114                                   | 1                | Lipase class 3 family protein                                                                                                                    |
| At5g18810            | 12                                    | 0                | SCL28; RNA binding / nucleic acid binding / nucleotide binding                                                                                   |
| At5g18840            | 13                                    | 0                | Sugar transporter, putative                                                                                                                      |
| At5g19151            | 104                                   | 2                | Unknown protein                                                                                                                                  |
| At5g19210            | 14                                    | 0                | DEAD/DEAH box helicase, putative                                                                                                                 |
| At5g19670            | 14                                    | 0                | Exostosin family protein                                                                                                                         |
| At5g19790            | 25                                    | 0                | RAP2.11 (related to AP2 11); DNA binding / transcription factor                                                                                  |
| At5g19810            | 34                                    | 0                | Proline-rich extensin-like family protein                                                                                                        |
| At5g19910            | 11                                    | 0                | SOH1 family protein                                                                                                                              |
| At5g20150            | 12                                    | 0                | SPX1 (SPX DOMAIN GENE 1)                                                                                                                         |
| At5g20250            | 681                                   | 18               | DIN10 (DARK INDUCIBLE 10); hydrolase, hydrolyzing O-glycosyl compounds                                                                           |
| At5g20500            | 31                                    | 0                | glutaredoxin, putative                                                                                                                           |
| At5g20510            | 22                                    | 0                | AL5 (ALFIN-LIKE 5); DNA binding / methylated histone residue binding                                                                             |
| At5g20660            | 23                                    | 0                | 24 kDa vacuolar protein, putative                                                                                                                |
| At5g20830            | 60                                    | 2                | SUS1 (SUCROSE SYNTHASE 1); UDP-glycosyltransferase/ sucrose synthase                                                                             |
| At5g21080            | 35                                    | 0                | Unknown protein                                                                                                                                  |
| At5g21140            | 26                                    | 1                | emb1379 (embryo defective 1379)                                                                                                                  |
| At5g21160            | 79                                    | 2                | La domain-containing protein / proline-rich family protein                                                                                       |
| At5g21900            | 34                                    | 0                | Unknown protein                                                                                                                                  |
| At5g22060            | 75                                    | 0                | ATJ2; protein binding                                                                                                                            |
| At5g22400            | 14                                    | 0                | Rac GTPase activating protein, putative                                                                                                          |
| At5g22450            | 52                                    | 2                | Unknown protein                                                                                                                                  |
| At5g22460            | 109                                   | 0                | Esterase/lipase/thioesterase family protein                                                                                                      |

Supplementary Table 4

| GENE ID <sup>a</sup> | Transcriptional activity <sup>b</sup> |                  | PREDICTED FUNCTION <sup>c</sup>                                                                                                                                  |
|----------------------|---------------------------------------|------------------|------------------------------------------------------------------------------------------------------------------------------------------------------------------|
|                      | Wild type ovule                       | <i>sp/ ovule</i> |                                                                                                                                                                  |
| At5g22830            | 21                                    | 0                | ATMGT10 (MAGNESIUM (MG) TRANSPORTER 10); magnesium ion transmembrane transporter                                                                                 |
| At5g22875            | 17                                    | 0                | Unknown protein                                                                                                                                                  |
| At5g23090            | 30                                    | 0                | NF-YB13 (NUCLEAR FACTOR Y, SUBUNIT B13); transcription factor                                                                                                    |
| At5g23380            | 24                                    | 0                | Unknown protein                                                                                                                                                  |
| At5g23395            | 128                                   | 0                | Encodes Mia40, a component of the mitochondrial intermembrane space assembly machinery involved in the import pathway of the small intermembrane space proteins. |
| At5g23850            | 27                                    | 0                | Unknown function.                                                                                                                                                |
| At5g23870            | 37                                    | 1                | Pectinacetylerase family protein                                                                                                                                 |
| At5g24400            | 22                                    | 0                | emb2024 (embryo defective 2024); 6-phosphogluconolactonase/ catalytic                                                                                            |
| At5g24735            | 49                                    | 0                | Unknown gene                                                                                                                                                     |
| At5g25060            | 13                                    | 0                | RNA recognition motif (RRM)-containing protein                                                                                                                   |
| At5g25080            | 31                                    | 0                | Sas10/Utp3/C1D family                                                                                                                                            |
| At5g25090            | 132                                   | 5                | Plastocyanin-like domain-containing protein                                                                                                                      |
| At5g25100            | 81                                    | 1                | Endomembrane protein 70, putative                                                                                                                                |
| At5g25780            | 30                                    | 0                | EIF3B-2 (EUKARYOTIC TRANSLATION INITIATION FACTOR 3B-2); nucleic acid binding / protein binding / translation initiation factor                                  |
| At5g25920            | 14                                    | 0                | BEST Arabidopsis thaliana protein match is: Eukaryotic aspartyl protease family protein                                                                          |
| At5g26200            | 13                                    | 0                | Mitochondrial substrate carrier family protein                                                                                                                   |
| At5g26210            | 38                                    | 0                | AL4 (ALFIN-LIKE 4); DNA binding / methylated histone residue binding                                                                                             |
| At5g26820            | 46                                    | 0                | ATIREG3 (IRON-REGULATED PROTEIN 3)                                                                                                                               |
| At5g26910            | 15                                    | 0                | Unknown protein                                                                                                                                                  |
| At5g27380            | 10                                    | 0                | GSH2 (GLUTATHIONE SYNTHETASE 2); glutathione synthase                                                                                                            |
| At5g27400            | 52                                    | 0                | Unknown protein                                                                                                                                                  |
| At5g27440            | 14                                    | 0                | Unknown protein                                                                                                                                                  |
| At5g27730            | 11                                    | 0                | Unknown protein                                                                                                                                                  |
| At5g27750            | 59                                    | 0                | F-box family protein                                                                                                                                             |
| At5g27830            | 14                                    | 0                | Unknown function                                                                                                                                                 |
| At5g27970            | 27                                    | 0                | Binding                                                                                                                                                          |
| At5g28000            | 40                                    | 0                | Bet v I allergen family protein                                                                                                                                  |
| At5g28020            | 39                                    | 0                | CYSD2 (CYSTEINE SYNTHASE D2); catalytic/ cysteine synthase/ pyridoxal phosphate binding                                                                          |
| At5g28626            | 11                                    | 0                | Transposable element gene                                                                                                                                        |
| At5g28840            | 10                                    | 0                | GME (GDP-D-MANNOSE 3',5'-EPIMERASE); GDP-mannose 3,5-epimerase/ NAD or NADH binding / catalytic                                                                  |
| At5g33340            | 23                                    | 0                | CDR1 (CONSTITUTIVE DISEASE RESISTANCE 1); aspartic-type endopeptidase                                                                                            |
| At5g35680            | 17                                    | 0                | Eukaryotic translation initiation factor 1A, putative / eIF-1A, putative / eIF-4C, putative                                                                      |

Supplementary Table 4

| GENE ID <sup>a</sup> | Transcriptional activity <sup>b</sup> |                  | PREDICTED FUNCTION <sup>c</sup>                                                                                      |
|----------------------|---------------------------------------|------------------|----------------------------------------------------------------------------------------------------------------------|
|                      | Wild type ovule                       | <i>sp/ ovule</i> |                                                                                                                      |
| At5g36170            | 13                                    | 0                | HCF109 (HIGH CHLOROPHYLL FLUORESCENT 109); translation release factor/ translation release factor, codon specific    |
| At5g37130            | 15                                    | 0                | Protein prenyltransferase superfamily protein                                                                        |
| At5g37190            | 11                                    | 0                | CIP4 (COP1-interacting protein 4); transcription cofactor                                                            |
| At5g37380            | 12                                    | 0                | DNAJ heat shock N-terminal domain-containing protein                                                                 |
| At5g37540            | 10                                    | 0                | Aspartyl protease family protein                                                                                     |
| At5g37710            | 15                                    | 0                | Lipase class 3 family protein / calmodulin-binding heat-shock protein, putative                                      |
| At5g37890            | 59                                    | 1                | Seven in absentia (SINA) protein, putative                                                                           |
| At5g38460            | 19                                    | 0                | ALG6, ALG8 glycosyltransferase family protein                                                                        |
| At5g38850            | 20                                    | 0                | Disease resistance protein (TIR-NBS-LRR class), putative                                                             |
| At5g38860            | 13                                    | 0                | BIM3 (BES1-interacting Myc-like protein 3); DNA binding / transcription factor                                       |
| At5g38970            | 39                                    | 0                | BR6OX1 (BRASSINOSTEROID-6-OXIDASE 1); monooxygenase/ oxygen binding                                                  |
| At5g39840            | 9                                     | 0                | ATP-dependent RNA helicase, mitochondrial, putative                                                                  |
| At5g40150            | 14                                    | 0                | Peroxidase, putative                                                                                                 |
| At5g40200            | 36                                    | 0                | DegP9 (DegP protease 9); catalytic/ protein binding / serine-type endopeptidase/ serine-type peptidase               |
| At5g40380            | 13                                    | 0                | Protein kinase family protein                                                                                        |
| At5g40760            | 72                                    | 0                | G6PD6 (GLUCOSE-6-PHOSPHATE DEHYDROGENASE 6); glucose-6-phosphate dehydrogenase                                       |
| At5g41020            | 9                                     | 0                | Myb family transcription factor                                                                                      |
| At5g41600            | 9                                     | 0                | BTI3 (VIRB2-INTERACTING PROTEIN 3)                                                                                   |
| At5g41980            | 36                                    | 0                | Unknown protein                                                                                                      |
| At5g42030            | 49                                    | 0                | ABIL4 (ABL INTERACTOR-LIKE PROTEIN 4)                                                                                |
| At5g42060            | 44                                    | 0                | Unknown protein                                                                                                      |
| At5g42242            | 9                                     | 0                | LCR57 (Low-molecular-weight cysteine-rich 57)                                                                        |
| At5g43280            | 53                                    | 0                | ATDCI1 (DELTA(3,5),DELTA(2,4)-DIENOYL-COA ISOMERASE 1); delta3,5-delta2,4-dienoyl-CoA isomerase/ enoyl-CoA hydratase |
| At5g43430            | 35                                    | 0                | ETFBETA; electron carrier                                                                                            |
| At5g43513            | 141                                   | 3                | Encodes a defensin-like (DEFL) family protein.                                                                       |
| At5g44040            | 13                                    | 0                | Unknown protein                                                                                                      |
| At5g44495            | 14                                    | 0                | Encodes a ECA1 gametogenesis related family protein                                                                  |
| At5g44500            | 10                                    | 0                | Small nuclear ribonucleoprotein associated protein B, putative / snRNP-B, putative / Sm protein B, putative          |
| At5g44760            | 24                                    | 0                | C2 domain-containing protein                                                                                         |
| At5g44860            | 18                                    | 0                | Unknown protein                                                                                                      |
| At5g44980            | 13                                    | 0                | F-box family protein                                                                                                 |
| At5g45050            | 14                                    | 0                | TTR1; protein binding / transcription factor                                                                         |
| At5g45110            | 10                                    | 0                | NPR3 (NPR1-LIKE PROTEIN 3); protein binding                                                                          |
| At5g45170            | 18                                    | 0                | CbbY protein-related                                                                                                 |
| At5g45260            | 19                                    | 0                | RRS1 (RESISTANT TO RALSTONIA SOLANACEARUM 1); DNA binding / transcription factor                                     |

Supplementary Table 4

| GENE ID <sup>a</sup> | Transcriptional activity <sup>b</sup> |                 | PREDICTED FUNCTION <sup>c</sup>                                                                      |
|----------------------|---------------------------------------|-----------------|------------------------------------------------------------------------------------------------------|
|                      | Wild type ovule                       | <i>sp/ovule</i> |                                                                                                      |
| At5g45590            | 18                                    | 0               | Unknown protein                                                                                      |
| At5g45750            | 9                                     | 0               | AtRABA1c (Arabidopsis Rab GTPase homolog A1c); GTP binding                                           |
| At5g45775            | 130                                   | 5               | 60S ribosomal protein L11 (RPL11D)                                                                   |
| At5g45790            | 14                                    | 0               | Ubiquitin thiolesterase                                                                              |
| At5g46590            | 14                                    | 0               | Anac096 (Arabidopsis NAC domain containing protein 96); transcription factor                         |
| At5g46700            | 9                                     | 0               | TRN2 (TORNADO 2)                                                                                     |
| At5g46730            | 18                                    | 0               | Glycine-rich protein                                                                                 |
| At5g46790            | 16                                    | 0               | Unknown protein                                                                                      |
| At5g46960            | 39                                    | 0               | Invertase/pectin methylesterase inhibitor family protein                                             |
| At5g47110            | 13                                    | 0               | liI3 protein, putative                                                                               |
| At5g47240            | 66                                    | 0               | Atnudt8 (Arabidopsis thaliana Nudix hydrolase homolog 8); hydrolase                                  |
| At5g47250            | 11                                    | 0               | Disease resistance protein (CC-NBS-LRR class), putative                                              |
| At5g47370            | 17                                    | 0               | HAT2; DNA binding / transcription factor/ transcription repressor                                    |
| At5g47520            | 18                                    | 0               | AtRABA5a (Arabidopsis Rab GTPase homolog A5a); GTP binding                                           |
| At5g47700            | 155                                   | 0               | 60S acidic ribosomal protein P1 (RPP1C)                                                              |
| At5g47810            | 12                                    | 0               | PFK2 (PHOSPHOFRUCTOKINASE 2); 6-phosphofructokinase                                                  |
| At5g48090            | 20                                    | 0               | ELP1 (EDM2-LIKE PROTEIN1)                                                                            |
| At5g48290            | 9                                     | 0               | Heavy-metal-associated domain-containing protein                                                     |
| At5g48520            | 26                                    | 0               | Unknown protein                                                                                      |
| At5g48530            | 43                                    | 0               | Unknown protein                                                                                      |
| At5g48840            | 19                                    | 0               | PANC (ARABIDOPSIS HOMOLOG OF BACTERIAL PANC); pantoate-beta-alanine ligase/ protein homodimerization |
| At5g49010            | 47                                    | 1               | SLD5 (SYNTHETIC LETHALITY WITH DPB11-1 5)                                                            |
| At5g49015            | 14                                    | 0               | Expressed protein                                                                                    |
| At5g49215            | 21                                    | 0               | Glycoside hydrolase family 28 protein / polygalacturonase (pectinase) family protein                 |
| At5g49220            | 13                                    | 0               | Unknown protein                                                                                      |
| At5g49400            | 34                                    | 0               | Zinc knuckle (CCHC-type) family protein                                                              |
| At5g49640            | 45                                    | 1               | Unknown protein                                                                                      |
| At5g49880            | 11                                    | 0               | Mitotic checkpoint family protein                                                                    |
| At5g50340            | 9                                     | 0               | ATP binding / damaged DNA binding / nucleoside-triphosphatase/ nucleotide binding                    |
| At5g50430            | 35                                    | 1               | UBC33 (ubiquitin-conjugating enzyme 33); ubiquitin-protein ligase                                    |
| At5g50930            | 26                                    | 0               | DNA binding                                                                                          |
| At5g50970            | 11                                    | 0               | WD-40 repeat family protein                                                                          |
| At5g51020            | 39                                    | 0               | CRL (CRUMPLED LEAF)                                                                                  |
| At5g51451            | 17                                    | 0               | Unknown protein                                                                                      |
| At5g51700            | 26                                    | 0               | PBS2 (PPHB SUSCEPTIBLE 2); protein binding / zinc ion binding                                        |
| At5g51890            | 24                                    | 0               | Peroxidase                                                                                           |
| At5g52030            | 11                                    | 0               | TraB protein-related                                                                                 |

Supplementary Table 4

| GENE ID <sup>a</sup> | Transcriptional activity <sup>b</sup> |                  | PREDICTED FUNCTION <sup>c</sup>                                                                                                                |
|----------------------|---------------------------------------|------------------|------------------------------------------------------------------------------------------------------------------------------------------------|
|                      | Wild type ovule                       | <i>sp/ ovule</i> |                                                                                                                                                |
| At5g52810            | 30                                    | 0                | Ornithine cyclodeaminase/mu-crystallin family protein                                                                                          |
| At5g52860            | 33                                    | 0                | ABC transporter family protein                                                                                                                 |
| At5g53060            | 43                                    | 1                | KH domain-containing protein                                                                                                                   |
| At5g53080            | 12                                    | 0                | Kinesin light chain-related                                                                                                                    |
| At5g53280            | 68                                    | 1                | PDV1 (PLASTID DIVISION1)                                                                                                                       |
| At5g53440            | 17                                    | 0                | Unknown protein                                                                                                                                |
| At5g53470            | 17                                    | 0                | ACBP1 (ACYL-COA BINDING PROTEIN 1); acyl-CoA binding / lead ion binding                                                                        |
| At5g53650            | 24                                    | 0                | Unknown protein                                                                                                                                |
| At5g53940            | 33                                    | 1                | Yippee family protein                                                                                                                          |
| At5g54160            | 60                                    | 0                | ATOMT1 (O-METHYLTRANSFERASE 1); caffeate O-methyltransferase/ myricetin 3'-O-methyltransferase/ quercetin 3-O-methyltransferase                |
| At5g54500            | 14                                    | 0                | FQR1 (FLAVODOXIN-LIKE QUINONE REDUCTASE 1); FMN binding / oxidoreductase, acting on NADH or NADPH, quinone or similar compound as acceptor     |
| At5g54760            | 14                                    | 0                | Eukaryotic translation initiation factor SUI1, putative                                                                                        |
| At5g54870            | 35                                    | 0                | Unknown protein                                                                                                                                |
| At5g55000            | 79                                    | 0                | FIP2; protein binding / voltage-gated potassium channel                                                                                        |
| At5g55120            | 131                                   | 3                | VTC5 (VITAMIN C DEFECTIVE 5); GDP-D-glucose phosphorylase/ galactose-1-phosphate guanylyltransferase (GDP)/ quercetin 4'-O-glucosyltransferase |
| At5g55160            | 34                                    | 0                | SUMO2 (SMALL UBIQUITIN-LIKE MODIFIER 2); protein binding / protein tag                                                                         |
| At5g55210            | 41                                    | 0                | Unknown protein                                                                                                                                |
| At5g55700            | 21                                    | 0                | BAM4 (BETA-AMYLASE 4); beta-amylase/ catalytic/ cation binding                                                                                 |
| At5g55930            | 25                                    | 1                | OPT1 (OLIGOPEPTIDE TRANSPORTER 1); oligopeptide transporter                                                                                    |
| At5g55940            | 11                                    | 0                | emb2731 (embryo defective 2731)                                                                                                                |
| At5g55990            | 9                                     | 0                | CBL2 (CALCINEURIN B-LIKE 2); calcium ion binding                                                                                               |
| At5g56020            | 35                                    | 1                | Got1/Sft2-like vesicle transport protein family                                                                                                |
| At5g56120            | 14                                    | 0                | Unknown protein                                                                                                                                |
| At5g56130            | 14                                    | 0                | Transducin family protein / WD-40 repeat family protein                                                                                        |
| At5g56350            | 23                                    | 0                | Pyruvate kinase, putative                                                                                                                      |
| At5g56550            | 17                                    | 0                | OXS3 (OXIDATIVE STRESS 3)                                                                                                                      |
| At5g56880            | 15                                    | 0                | Unknown protein                                                                                                                                |
| At5g56890            | 16                                    | 0                | Protein kinase family protein                                                                                                                  |
| At5g57070            | 12                                    | 0                | Hhydroxyproline-rich glycoprotein family protein                                                                                               |
| At5g57160            | 13                                    | 0                | ATLIG4; DNA ligase (ATP)/ protein binding                                                                                                      |
| At5g57280            | 31                                    | 0                | Methyltransferase                                                                                                                              |
| At5g57290            | 43                                    | 0                | 60S acidic ribosomal protein P3 (RPP3B)                                                                                                        |
| At5g57410            | 30                                    | 1                | Unknown protein                                                                                                                                |
| At5g57590            | 30                                    | 0                | BIO1 (biotin auxotroph 1); adenosylmethionine-8-amino-7-oxononanoate transaminase                                                              |

Supplementary Table 4

| GENE ID <sup>a</sup> | Transcriptional activity <sup>b</sup> |                 | PREDICTED FUNCTION <sup>c</sup>                                                                                                                  |
|----------------------|---------------------------------------|-----------------|--------------------------------------------------------------------------------------------------------------------------------------------------|
|                      | Wild type ovule                       | <i>sp/ovule</i> |                                                                                                                                                  |
| At5g57940            | 10                                    | 0               | ATCNGC5 (CYCLIC NUCLEOTIDE GATED CHANNEL 5); calmodulin binding / cyclic nucleotide binding / potassium channel                                  |
| At5g57960            | 28                                    | 0               | GTP-binding family protein                                                                                                                       |
| At5g58640            | 21                                    | 0               | Selenoprotein-related                                                                                                                            |
| At5g58750            | 40                                    | 0               | Wound-responsive protein-related                                                                                                                 |
| At5g59030            | 28                                    | 0               | COPT1 (copper transporter 1); copper ion transmembrane transporter                                                                               |
| At5g59290            | 35                                    | 0               | UXS3 (UDP-GLUCURONIC ACID DECARBOXYLASE 3); UDP-glucuronate decarboxylase/ catalytic                                                             |
| At5g59440            | 23                                    | 0               | ZEU1 (ZEUS1); ATP binding / thymidylate kinase                                                                                                   |
| At5g59470            | 24                                    | 0               | PQ-loop repeat family protein / transmembrane family protein                                                                                     |
| At5g59550            | 65                                    | 0               | Zinc finger (C3HC4-type RING finger) family protein                                                                                              |
| At5g59810            | 29                                    | 0               | SBT5.4; identical protein binding / serine-type endopeptidase                                                                                    |
| At5g59960            | 27                                    | 0               | Unknown protein                                                                                                                                  |
| At5g60170            | 83                                    | 3               | RNA binding / nucleic acid binding / nucleotide binding / protein binding / zinc ion binding                                                     |
| At5g60200            | 27                                    | 0               | Dof-type zinc finger domain-containing protein                                                                                                   |
| At5g60340            | 11                                    | 0               | MaoC-like dehydratase domain-containing protein                                                                                                  |
| At5g60460            | 13                                    | 0               | Sec61beta family protein                                                                                                                         |
| At5g60553            | 19                                    | 0               | Encodes a defensin-like (DEFL) family protein.                                                                                                   |
| At5g60600            | 24                                    | 0               | HDS (4-HYDROXY-3-METHYLBUT-2-ENYL DIPHOSPHATE SYNTHASE); 4 iron, 4 sulfur cluster binding / 4-hydroxy-3-methylbut-2-en-1-yl diphosphate synthase |
| At5g60630            | 39                                    | 1               | Unknown protein                                                                                                                                  |
| At5g60640            | 61                                    | 0               | ATPDIL1-4 (PDI-LIKE 1-4); protein disulfide isomerase                                                                                            |
| At5g60690            | 17                                    | 0               | REV (REVOLUTA); DNA binding / lipid binding / transcription factor                                                                               |
| At5g60880            | 32                                    | 0               | Unknown protein                                                                                                                                  |
| At5g60963            | 11                                    | 0               | pre-tRNA                                                                                                                                         |
| At5g61530            | 12                                    | 0               | Small G protein family protein / RhoGAP family protein                                                                                           |
| At5g61800            | 14                                    | 0               | Pentatricopeptide (PPR) repeat-containing protein                                                                                                |
| At5g61820            | 13                                    | 0               | Unknown function                                                                                                                                 |
| At5g61840            | 64                                    | 0               | GUT1; catalytic/ glucuronoxylan glucuronosyltransferase                                                                                          |
| At5g61920            | 38                                    | 1               | Unknown protein                                                                                                                                  |
| At5g61930            | 50                                    | 0               | APO3 (ACCUMULATION OF PHOTOSYSTEM ONE 3)                                                                                                         |
| At5g61990            | 14                                    | 0               | Pentatricopeptide (PPR) repeat-containing protein                                                                                                |
| At5g62000            | 35                                    | 1               | ARF2 (AUXIN RESPONSE FACTOR 2); protein binding / transcription factor                                                                           |
| At5g58920            | 37                                    | 0               | Unknown protein                                                                                                                                  |
| At5g62080            | 12                                    | 0               | Protease inhibitor/seed storage/lipid transfer protein (LTP) family protein                                                                      |
| At5g62170            | 30                                    | 1               | Unknown protein                                                                                                                                  |

Supplementary Table 4

| GENE ID <sup>a</sup> | Transcriptional activity <sup>b</sup> |                  | PREDICTED FUNCTION <sup>c</sup>                                                                                                                                 |
|----------------------|---------------------------------------|------------------|-----------------------------------------------------------------------------------------------------------------------------------------------------------------|
|                      | Wild type ovule                       | <i>sp/ ovule</i> |                                                                                                                                                                 |
| At5g62200            | 31                                    | 0                | Embryo-specific protein-related                                                                                                                                 |
| At5g62280            | 42                                    | 0                | Unknown protein                                                                                                                                                 |
| At5g62550            | 11                                    | 0                | Unknown protein                                                                                                                                                 |
| At5g62610            | 180                                   | 2                | Basic helix-loop-helix (bHLH) family protein                                                                                                                    |
| At5g62710            | 17                                    | 0                | Leucine-rich repeat family protein / protein kinase family protein                                                                                              |
| At5g62910            | 58                                    | 2                | Protein binding / zinc ion binding                                                                                                                              |
| At5g62920            | 12                                    | 0                | ARR6 (RESPONSE REGULATOR 6); transcription regulator/ two-component response regulator                                                                          |
| At5g62940            | 76                                    | 0                | Dof-type zinc finger domain-containing protein                                                                                                                  |
| At5g62980            | 82                                    | 0                | Dihydroneopterin aldolase, putative                                                                                                                             |
| At5g63060            | 16                                    | 0                | Transporter                                                                                                                                                     |
| At5g63063            | 11                                    | 0                | Encodes a Plant thionin family protein                                                                                                                          |
| At5g63087            | 26                                    | 0                | Encodes a Plant thionin family protein                                                                                                                          |
| At5g63180            | 24                                    | 0                | Pectate lyase family protein                                                                                                                                    |
| At5g63300            | 12                                    | 0                | Structural constituent of ribosome                                                                                                                              |
| At5g63490            | 33                                    | 0                | CBS domain-containing protein / octicosapeptide/Phox/Bemp1 (PB1) domain-containing protein                                                                      |
| At5g63500            | 43                                    | 0                | Unknown protein                                                                                                                                                 |
| At5g63760            | 92                                    | 2                | IBR domain-containing protein                                                                                                                                   |
| At5g63800            | 9                                     | 0                | MUM2 (MUCILAGE-MODIFIED 2); beta-galactosidase                                                                                                                  |
| At5g63870            | 19                                    | 0                | PP7 (SERINE/THREONINE PHOSPHATASE 7); protein serine/threonine phosphatase                                                                                      |
| At5g63920            | 52                                    | 0                | DNA topoisomerase III alpha, putative                                                                                                                           |
| At5g64050            | 39                                    | 0                | ERS (GLUTAMATE TRNA SYNTHETASE); glutamate-tRNA ligase                                                                                                          |
| At5g64150            | 30                                    | 0                | Methylase family protein                                                                                                                                        |
| At5g64250            | 60                                    | 0                | 2-nitropropane dioxygenase family / NPD family.                                                                                                                 |
| At5g64280            | 12                                    | 0                | DiT2.2 (dicarboxylate transporter 2.2); oxoglutarate:malate antiporter                                                                                          |
| At5g64440            | 42                                    | 1                | AtFAAH (Arabidopsis thaliana fatty acid amide hydrolase); N-(long-chain-acyl)ethanolamine deacylase/ amidase                                                    |
| At5g64572            | 40                                    | 0                | Potential natural antisense gene, locus overlaps with At5g64570.                                                                                                |
| At5g64650            | 17                                    | 0                | Ribosomal protein L17 family protein                                                                                                                            |
| At5g65080            | 20                                    | 0                | MAF5 (MADS AFFECTING FLOWERING 5); transcription factor                                                                                                         |
| At5g65180            | 17                                    | 0                | ENTH/VHS family protein                                                                                                                                         |
| At5g65470            | 12                                    | 0                | Unknown protein                                                                                                                                                 |
| At5g65520            | 89                                    | 0                | Tetratricopeptide repeat (TPR)-like superfamily protein                                                                                                         |
| At5g65540            | 49                                    | 0                | Unknown protein                                                                                                                                                 |
| At5g65650            | 25                                    | 0                | Unknown protein                                                                                                                                                 |
| At3g01740            | 109                                   | 0                | Unknown protein                                                                                                                                                 |
| At5g65685            | 38                                    | 0                | Soluble glycogen synthase-related                                                                                                                               |
| At5g65690            | 16                                    | 0                | PCK2 (PHOSPHOENOLPYRUVATE CARBOXYKINASE 2); ATP binding / phosphoenolpyruvate carboxykinase (ATP)/ phosphoenolpyruvate carboxykinase/ purine nucleotide binding |

Supplementary Table 4

| GENE ID <sup>a</sup> | Transcriptional activity <sup>b</sup> |                  | PREDICTED FUNCTION <sup>c</sup>                                                                                                                    |
|----------------------|---------------------------------------|------------------|----------------------------------------------------------------------------------------------------------------------------------------------------|
|                      | Wild type ovule                       | <i>sp/ ovule</i> |                                                                                                                                                    |
| At5g65730            | 9                                     | 0                | Xyloglucan:xyloglucosyl transferase, putative / xyloglucan endotransglycosylase, putative / endo-xyloglucan transferase, putative                  |
| At5g65850            | 17                                    | 0                | F-box family protein                                                                                                                               |
| At5g65900            | 27                                    | 0                | DEAD/DEAH box helicase, putative                                                                                                                   |
| At5g66000            | 9                                     | 0                | Unknown protein                                                                                                                                    |
| At5g66130            | 11                                    | 0                | ATRAD17 (ARABIDOPSIS THALIANA RADIATION SENSITIVE)                                                                                                 |
| At5g66500            | 13                                    | 0                | Pentatricopeptide (PPR) repeat-containing protein                                                                                                  |
| At5g66770            | 57                                    | 0                | Scarecrow transcription factor family protein                                                                                                      |
| At5g66810            | 11                                    | 0                | Unknown function                                                                                                                                   |
| At5g67130            | 40                                    | 0                | Phospholipase C/ phosphoric diester hydrolase                                                                                                      |
| At5g67470            | 11                                    | 0                | Formin homology 2 domain-containing protein / FH2 domain-containing protein                                                                        |
| At5g67580            | 19                                    | 0                | TRB2; DNA binding / double-stranded telomeric DNA binding / protein homodimerization/ single-stranded telomeric DNA binding / transcription factor |
| AtCg00030            | 50                                    | 1                | Lysine tRNA                                                                                                                                        |
| AtCg00160            | 14                                    | 0                | Chloroplast ribosomal protein S2                                                                                                                   |

<sup>a</sup> The Arabidopsis Genome Initiative Number.

<sup>b</sup> Activity in transcripts per Million.

<sup>c</sup> From The Arabidopsis Information Resource ([www.arabidopsis.org](http://www.arabidopsis.org)).



## Supplementary Table 5

Supplementary Table5. Fisher exact test for 1,301 *sp/* downregulated genes.

| Gene ID <sup>a</sup> | Raw transcriptional activity  |                                | Fisher pvalue |
|----------------------|-------------------------------|--------------------------------|---------------|
|                      | Wild Type ovules <sup>b</sup> | <i>sp/</i> ovules <sup>b</sup> |               |
| AT1G01050            | 51                            | 0                              | 4.18E-16      |
| AT1G01060            | 274                           | 0                              | 2.35E-83      |
| AT1G01360            | 13                            | 0                              | 1.20E-04      |
| AT1G01490            | 53                            | 1                              | 2.93E-15      |
| AT1G01920            | 27                            | 0                              | 7.22E-09      |
| AT1G02060            | 25                            | 0                              | 2.89E-08      |
| AT1G02065            | 41                            | 0                              | 4.33E-13      |
| AT1G02790            | 62                            | 0                              | 2.01E-19      |
| AT1G03030            | 30                            | 0                              | 8.99E-10      |
| AT1G03250            | 53                            | 0                              | 1.04E-16      |
| AT1G03350            | 48                            | 0                              | 3.36E-15      |
| AT1G03440            | 16                            | 0                              | 1.50E-05      |
| AT1G03610            | 57                            | 0                              | 6.48E-18      |
| AT1G03630            | 12                            | 0                              | 2.41E-04      |
| AT1G04280            | 19                            | 0                              | 1.86E-06      |
| AT1G04410            | 625                           | 20                             | 1.75E-157     |
| AT1G04510            | 12                            | 0                              | 2.41E-04      |
| AT1G04830            | 33                            | 1                              | 2.02E-09      |
| AT1G05500            | 71                            | 0                              | 3.89E-22      |
| AT1G05540            | 113                           | 0                              | 8.41E-35      |
| AT1G05710            | 180                           | 0                              | 5.24E-55      |
| AT1G05805            | 23                            | 0                              | 1.16E-07      |
| AT1G06040            | 63                            | 0                              | 1.01E-19      |
| AT1G06070            | 16                            | 1                              | 1.43E-04      |
| AT1G06250            | 16                            | 0                              | 1.50E-05      |
| AT1G06470            | 31                            | 0                              | 4.49E-10      |
| AT1G06960            | 117                           | 5                              | 3.75E-29      |
| AT1G07020            | 129                           | 4                              | 1.06E-33      |
| AT1G07090            | 13                            | 0                              | 1.20E-04      |
| AT1G07180            | 42                            | 0                              | 2.16E-13      |
| AT1G07530            | 12                            | 0                              | 2.41E-04      |
| AT1G07960            | 22                            | 0                              | 2.32E-07      |
| AT1G08680            | 86                            | 0                              | 1.17E-26      |
| AT1G09080            | 44                            | 0                              | 5.39E-14      |
| AT1G09570            | 15                            | 0                              | 3.00E-05      |
| AT1G09575            | 13                            | 0                              | 1.20E-04      |
| AT1G09710            | 29                            | 0                              | 1.80E-09      |
| AT1G10455            | 20                            | 0                              | 9.31E-07      |

Supplementary Table 5

| Gene ID <sup>a</sup> | Raw transcriptional activity  |                                |               |
|----------------------|-------------------------------|--------------------------------|---------------|
|                      | Wild Type ovules <sup>b</sup> | <i>sp</i> /ovules <sup>b</sup> | Fisher pvalue |
| AT1G10538            | 39                            | 2                              | 3.95E-10      |
| AT1G10590            | 49                            | 0                              | 1.68E-15      |
| AT1G10650            | 12                            | 0                              | 2.41E-04      |
| AT1G10710            | 27                            | 0                              | 7.22E-09      |
| AT1G10730            | 19                            | 0                              | 1.86E-06      |
| AT1G10840            | 16                            | 0                              | 1.50E-05      |
| AT1G11200            | 19                            | 0                              | 1.86E-06      |
| AT1G11260            | 53                            | 0                              | 1.04E-16      |
| AT1G11362            | 19                            | 0                              | 1.86E-06      |
| AT1G11800            | 20                            | 0                              | 9.31E-07      |
| AT1G11900            | 12                            | 0                              | 2.41E-04      |
| AT1G12080            | 97                            | 0                              | 5.62E-30      |
| AT1G12300            | 22                            | 0                              | 2.32E-07      |
| AT1G12310            | 19                            | 0                              | 1.86E-06      |
| AT1G12400            | 33                            | 1                              | 2.02E-09      |
| AT1G12610            | 52                            | 0                              | 2.09E-16      |
| AT1G12750            | 20                            | 0                              | 9.31E-07      |
| AT1G12775            | 18                            | 0                              | 3.73E-06      |
| AT1G12820            | 139                           | 3                              | 7.48E-38      |
| AT1G13170            | 14                            | 0                              | 6.00E-05      |
| AT1G13210            | 30                            | 0                              | 8.99E-10      |
| AT1G13450            | 16                            | 0                              | 1.50E-05      |
| AT1G13750            | 42                            | 0                              | 2.16E-13      |
| AT1G14200            | 58                            | 0                              | 3.24E-18      |
| AT1G14260            | 25                            | 0                              | 2.89E-08      |
| AT1G14280            | 49                            | 0                              | 1.68E-15      |
| AT1G14530            | 15                            | 0                              | 3.00E-05      |
| AT1G14650            | 37                            | 0                              | 6.96E-12      |
| AT1G15020            | 62                            | 0                              | 2.01E-19      |
| AT1G15220            | 19                            | 0                              | 1.86E-06      |
| AT1G15350            | 19                            | 0                              | 1.86E-06      |
| AT1G15690            | 243                           | 3                              | 1.67E-68      |
| AT1G15780            | 90                            | 0                              | 7.25E-28      |
| AT1G16170            | 13                            | 0                              | 1.20E-04      |
| AT1G16300            | 15                            | 0                              | 3.00E-05      |
| AT1G16390            | 14                            | 0                              | 6.00E-05      |
| AT1G16445            | 29                            | 0                              | 1.80E-09      |
| AT1G16590            | 28                            | 0                              | 3.60E-09      |
| AT1G16630            | 14                            | 0                              | 6.00E-05      |
| AT1G17130            | 13                            | 0                              | 1.20E-04      |

Supplementary Table 5

| Gene ID <sup>a</sup> | Raw transcriptional activity  |                                | Fisher pvalue |
|----------------------|-------------------------------|--------------------------------|---------------|
|                      | Wild Type ovules <sup>b</sup> | <i>sp</i> /ovules <sup>b</sup> |               |
| AT1G17400            | 31                            | 0                              | 4.49E-10      |
| AT1G17550            | 122                           | 1                              | 1.02E-35      |
| AT1G17890            | 58                            | 2                              | 1.54E-15      |
| AT1G17930            | 21                            | 5                              | 1.50E-03      |
| AT1G18075            | 56                            | 0                              | 1.30E-17      |
| AT1G18500            | 35                            | 1                              | 5.32E-10      |
| AT1G18610            | 17                            | 0                              | 7.48E-06      |
| AT1G18840            | 26                            | 0                              | 1.44E-08      |
| AT1G19350            | 19                            | 0                              | 1.86E-06      |
| AT1G19450            | 18                            | 0                              | 3.73E-06      |
| AT1G19690            | 101                           | 0                              | 3.49E-31      |
| AT1G19790            | 20                            | 0                              | 9.31E-07      |
| AT1G19990            | 88                            | 0                              | 2.91E-27      |
| AT1G20000            | 14                            | 0                              | 6.00E-05      |
| AT1G20140            | 44                            | 0                              | 5.39E-14      |
| AT1G20220            | 20                            | 0                              | 9.31E-07      |
| AT1G20830            | 15                            | 0                              | 3.00E-05      |
| AT1G21080            | 26                            | 0                              | 1.44E-08      |
| AT1G21390            | 23                            | 0                              | 1.16E-07      |
| AT1G21400            | 28                            | 0                              | 3.60E-09      |
| AT1G21460            | 38                            | 0                              | 3.48E-12      |
| AT1G21700            | 21                            | 0                              | 4.65E-07      |
| AT1G22140            | 110                           | 2                              | 1.10E-30      |
| AT1G22275            | 17                            | 0                              | 7.48E-06      |
| AT1G22970            | 28                            | 0                              | 3.60E-09      |
| AT1G23350            | 24                            | 0                              | 5.79E-08      |
| AT1G23550            | 49                            | 0                              | 1.68E-15      |
| AT1G23790            | 56                            | 2                              | 5.79E-15      |
| AT1G23960            | 174                           | 5                              | 1.65E-45      |
| AT1G24070            | 29                            | 0                              | 1.80E-09      |
| AT1G24120            | 52                            | 1                              | 5.76E-15      |
| AT1G24160            | 13                            | 0                              | 1.20E-04      |
| AT1G24490            | 12                            | 0                              | 2.41E-04      |
| AT1G25490            | 15                            | 0                              | 3.00E-05      |
| AT1G26480            | 42                            | 2                              | 5.64E-11      |
| AT1G26610            | 28                            | 0                              | 3.60E-09      |
| AT1G26620            | 20                            | 0                              | 9.31E-07      |
| AT1G26795            | 134                           | 0                              | 3.91E-41      |
| AT1G27030            | 21                            | 0                              | 4.65E-07      |
| AT1G27390            | 75                            | 1                              | 9.47E-22      |

Supplementary Table 5

| Gene ID <sup>a</sup> | Raw transcriptional activity  |                                |               |
|----------------------|-------------------------------|--------------------------------|---------------|
|                      | Wild Type ovules <sup>b</sup> | <i>sp</i> /ovules <sup>b</sup> | Fisher pvalue |
| AT1G27520            | 25                            | 0                              | 2.89E-08      |
| AT1G27530            | 105                           | 3                              | 5.93E-28      |
| AT1G28330            | 1078                          | 39                             | 3.80E-265     |
| AT1G28440            | 67                            | 0                              | 6.25E-21      |
| AT1G28760            | 15                            | 0                              | 3.00E-05      |
| AT1G29060            | 29                            | 0                              | 1.80E-09      |
| AT1G29140            | 30                            | 0                              | 8.99E-10      |
| AT1G29260            | 49                            | 2                              | 5.82E-13      |
| AT1G29330            | 19                            | 0                              | 1.86E-06      |
| AT1G29357            | 36                            | 1                              | 2.73E-10      |
| AT1G30440            | 13                            | 0                              | 1.20E-04      |
| AT1G30970            | 21                            | 0                              | 4.65E-07      |
| AT1G31330            | 292                           | 2                              | 9.66E-85      |
| AT1G31660            | 13                            | 0                              | 1.20E-04      |
| AT1G31760            | 169                           | 6                              | 6.83E-43      |
| AT1G31810            | 32                            | 0                              | 2.24E-10      |
| AT1G32120            | 18                            | 0                              | 3.73E-06      |
| AT1G32300            | 14                            | 0                              | 6.00E-05      |
| AT1G32310            | 45                            | 0                              | 2.69E-14      |
| AT1G32390            | 27                            | 0                              | 7.22E-09      |
| AT1G32460            | 20                            | 0                              | 9.31E-07      |
| AT1G32470            | 27                            | 0                              | 7.22E-09      |
| AT1G33230            | 19                            | 0                              | 1.86E-06      |
| AT1G33360            | 42                            | 0                              | 2.16E-13      |
| AT1G33970            | 31                            | 0                              | 4.49E-10      |
| AT1G34210            | 33                            | 0                              | 1.12E-10      |
| AT1G34380            | 26                            | 0                              | 1.44E-08      |
| AT1G34550            | 17                            | 0                              | 7.48E-06      |
| AT1G35180            | 15                            | 0                              | 3.00E-05      |
| AT1G43886            | 49                            | 1                              | 4.37E-14      |
| AT1G44900            | 82                            | 0                              | 1.87E-25      |
| AT1G45000            | 74                            | 0                              | 4.85E-23      |
| AT1G45180            | 14                            | 0                              | 6.00E-05      |
| AT1G46264            | 90                            | 2                              | 7.98E-25      |
| AT1G47128            | 141                           | 1                              | 2.19E-41      |
| AT1G47240            | 18                            | 0                              | 3.73E-06      |
| AT1G47450            | 36                            | 0                              | 1.39E-11      |
| AT1G47470            | 29                            | 0                              | 1.80E-09      |
| AT1G47670            | 87                            | 0                              | 5.82E-27      |
| AT1G47780            | 69                            | 0                              | 1.56E-21      |

Supplementary Table 5

| Gene ID <sup>a</sup> | Raw transcriptional activity     |                                |               |
|----------------------|----------------------------------|--------------------------------|---------------|
|                      | Wild Type<br>ovules <sup>b</sup> | <i>sp</i> /ovules <sup>b</sup> | Fisher pvalue |
| AT1G47830            | 39                               | 1                              | 3.66E-11      |
| AT1G47930            | 21                               | 0                              | 4.65E-07      |
| AT1G48460            | 38                               | 0                              | 3.48E-12      |
| AT1G48560            | 21                               | 0                              | 4.65E-07      |
| AT1G48600            | 26                               | 0                              | 1.44E-08      |
| AT1G48900            | 75                               | 0                              | 2.42E-23      |
| AT1G48950            | 34                               | 2                              | 9.90E-09      |
| AT1G49650            | 26                               | 0                              | 1.44E-08      |
| AT1G49920            | 61                               | 0                              | 4.03E-19      |
| AT1G50000            | 40                               | 0                              | 8.67E-13      |
| AT1G50010            | 12                               | 0                              | 2.41E-04      |
| AT1G50250            | 74                               | 0                              | 4.85E-23      |
| AT1G50440            | 19                               | 0                              | 1.86E-06      |
| AT1G50500            | 20                               | 0                              | 9.31E-07      |
| AT1G50510            | 13                               | 0                              | 1.20E-04      |
| AT1G51100            | 37                               | 0                              | 6.96E-12      |
| AT1G51440            | 18                               | 0                              | 3.73E-06      |
| AT1G51550            | 14                               | 0                              | 6.00E-05      |
| AT1G51570            | 115                              | 2                              | 3.71E-32      |
| AT1G52190            | 51                               | 0                              | 4.18E-16      |
| AT1G52220            | 191                              | 4                              | 9.77E-52      |
| AT1G52250            | 12                               | 0                              | 2.41E-04      |
| AT1G52347            | 22                               | 0                              | 2.32E-07      |
| AT1G52590            | 17                               | 0                              | 7.48E-06      |
| AT1G52730            | 23                               | 0                              | 1.16E-07      |
| AT1G53120            | 45                               | 2                              | 7.98E-12      |
| AT1G53170            | 18                               | 0                              | 3.73E-06      |
| AT1G53300            | 39                               | 0                              | 1.74E-12      |
| AT1G53440            | 97                               | 3                              | 1.22E-25      |
| AT1G53645            | 53                               | 0                              | 1.04E-16      |
| AT1G53760            | 23                               | 0                              | 1.16E-07      |
| AT1G54260            | 100                              | 5                              | 2.37E-24      |
| AT1G54570            | 14                               | 0                              | 6.00E-05      |
| AT1G54580            | 661                              | 0                              | 4.44E-200     |
| AT1G54630            | 14                               | 0                              | 6.00E-05      |
| AT1G54830            | 17                               | 0                              | 7.48E-06      |
| AT1G54850            | 27                               | 0                              | 7.22E-09      |
| AT1G55170            | 14                               | 0                              | 6.00E-05      |
| AT1G55260            | 58                               | 1                              | 9.91E-17      |
| AT1G55680            | 61                               | 0                              | 4.03E-19      |

Supplementary Table 5

| Gene ID <sup>a</sup> | Raw transcriptional activity  |                                |               |
|----------------------|-------------------------------|--------------------------------|---------------|
|                      | Wild Type ovules <sup>b</sup> | <i>sp</i> /ovules <sup>b</sup> | Fisher pvalue |
| AT1G55810            | 76                            | 1                              | 4.79E-22      |
| AT1G55820            | 12                            | 0                              | 2.41E-04      |
| AT1G56020            | 25                            | 0                              | 2.89E-08      |
| AT1G56180            | 54                            | 0                              | 5.20E-17      |
| AT1G56450            | 49                            | 0                              | 1.68E-15      |
| AT1G56610            | 13                            | 0                              | 1.20E-04      |
| AT1G57590            | 15                            | 0                              | 3.00E-05      |
| AT1G58220            | 25                            | 0                              | 2.89E-08      |
| AT1G58227            | 12                            | 0                              | 2.41E-04      |
| AT1G58250            | 26                            | 0                              | 1.44E-08      |
| AT1G58520            | 16                            | 0                              | 1.50E-05      |
| AT1G59520            | 24                            | 0                              | 5.79E-08      |
| AT1G60000            | 16                            | 0                              | 1.50E-05      |
| AT1G60160            | 17                            | 0                              | 7.48E-06      |
| AT1G60650            | 19                            | 0                              | 1.86E-06      |
| AT1G60740            | 44                            | 2                              | 1.53E-11      |
| AT1G60860            | 65                            | 0                              | 2.51E-20      |
| AT1G60940            | 117                           | 1                              | 3.15E-34      |
| AT1G60960            | 45                            | 2                              | 7.98E-12      |
| AT1G60970            | 17                            | 0                              | 7.48E-06      |
| AT1G60990            | 20                            | 0                              | 9.31E-07      |
| AT1G61670            | 39                            | 13                             | 2.64E-04      |
| AT1G61790            | 241                           | 4                              | 2.03E-66      |
| AT1G62130            | 13                            | 0                              | 1.20E-04      |
| AT1G62520            | 34                            | 1                              | 1.04E-09      |
| AT1G62730            | 17                            | 0                              | 7.48E-06      |
| AT1G62860            | 37                            | 0                              | 6.96E-12      |
| AT1G63130            | 32                            | 2                              | 3.56E-08      |
| AT1G63220            | 152                           | 6                              | 4.94E-38      |
| AT1G63490            | 40                            | 1                              | 1.87E-11      |
| AT1G63500            | 34                            | 0                              | 5.59E-11      |
| AT1G64050            | 27                            | 0                              | 7.22E-09      |
| AT1G64230            | 43                            | 1                              | 2.49E-12      |
| AT1G64280            | 23                            | 0                              | 1.16E-07      |
| AT1G64520            | 94                            | 2                              | 5.40E-26      |
| AT1G64740            | 43                            | 0                              | 1.08E-13      |
| AT1G65240            | 61                            | 1                              | 1.29E-17      |
| AT1G66150            | 35                            | 0                              | 2.79E-11      |
| AT1G66660            | 26                            | 0                              | 1.44E-08      |
| AT1G67325            | 21                            | 0                              | 4.65E-07      |

Supplementary Table 5

| Gene ID <sup>a</sup> | Raw transcriptional activity  |                                | Fisher pvalue |
|----------------------|-------------------------------|--------------------------------|---------------|
|                      | Wild Type ovules <sup>b</sup> | <i>sp</i> /ovules <sup>b</sup> |               |
| AT1G67570            | 41                            | 0                              | 4.33E-13      |
| AT1G67650            | 16                            | 0                              | 1.50E-05      |
| AT1G67660            | 12                            | 0                              | 2.41E-04      |
| AT1G67750            | 57                            | 0                              | 6.48E-18      |
| AT1G68020            | 15                            | 0                              | 3.00E-05      |
| AT1G68440            | 24                            | 0                              | 5.79E-08      |
| AT1G69230            | 26                            | 0                              | 1.44E-08      |
| AT1G69400            | 35                            | 0                              | 2.79E-11      |
| AT1G69850            | 14                            | 0                              | 6.00E-05      |
| AT1G70100            | 30                            | 0                              | 8.99E-10      |
| AT1G70250            | 29                            | 0                              | 1.80E-09      |
| AT1G70280            | 21                            | 0                              | 4.65E-07      |
| AT1G70500            | 58                            | 2                              | 1.54E-15      |
| AT1G70560            | 68                            | 0                              | 3.12E-21      |
| AT1G70660            | 99                            | 3                              | 3.23E-26      |
| AT1G71030            | 26                            | 0                              | 1.44E-08      |
| AT1G71260            | 94                            | 1                              | 2.20E-27      |
| AT1G71310            | 29                            | 0                              | 1.80E-09      |
| AT1G71380            | 18                            | 0                              | 3.73E-06      |
| AT1G71430            | 24                            | 0                              | 5.79E-08      |
| AT1G71730            | 18                            | 0                              | 3.73E-06      |
| AT1G71750            | 47                            | 0                              | 6.72E-15      |
| AT1G72300            | 34                            | 0                              | 5.59E-11      |
| AT1G72550            | 49                            | 0                              | 1.68E-15      |
| AT1G72880            | 21                            | 0                              | 4.65E-07      |
| AT1G73450            | 13                            | 0                              | 1.20E-04      |
| AT1G73885            | 28                            | 0                              | 3.60E-09      |
| AT1G73910            | 22                            | 0                              | 2.32E-07      |
| AT1G74180            | 37                            | 0                              | 6.96E-12      |
| AT1G74390            | 78                            | 1                              | 1.23E-22      |
| AT1G74700            | 27                            | 0                              | 7.22E-09      |
| AT1G74840            | 94                            | 0                              | 4.51E-29      |
| AT1G75020            | 79                            | 1                              | 6.19E-23      |
| AT1G75150            | 15                            | 0                              | 3.00E-05      |
| AT1G75780            | 36                            | 2                              | 2.74E-09      |
| AT1G75840            | 59                            | 1                              | 5.03E-17      |
| AT1G75980            | 57                            | 0                              | 6.48E-18      |
| AT1G76100            | 68                            | 0                              | 3.12E-21      |
| AT1G76130            | 34                            | 0                              | 5.59E-11      |
| AT1G76185            | 19                            | 0                              | 1.86E-06      |

Supplementary Table 5

| Gene ID <sup>a</sup> | Raw transcriptional activity  |                                | Fisher pvalue |
|----------------------|-------------------------------|--------------------------------|---------------|
|                      | Wild Type ovules <sup>b</sup> | <i>sp</i> /ovules <sup>b</sup> |               |
| AT1G76600            | 23                            | 5                              | 5.38E-04      |
| AT1G76830            | 17                            | 0                              | 7.48E-06      |
| AT1G77380            | 12                            | 0                              | 2.41E-04      |
| AT1G77720            | 14                            | 0                              | 6.00E-05      |
| AT1G77760            | 46                            | 0                              | 1.35E-14      |
| AT1G78560            | 26                            | 0                              | 1.44E-08      |
| AT1G79070            | 46                            | 1                              | 3.31E-13      |
| AT1G79410            | 20                            | 0                              | 9.31E-07      |
| AT1G79690            | 43                            | 1                              | 2.49E-12      |
| AT1G79710            | 23                            | 0                              | 1.16E-07      |
| AT1G79810            | 42                            | 1                              | 4.88E-12      |
| AT1G80370            | 43                            | 2                              | 2.94E-11      |
| AT1G80460            | 59                            | 0                              | 1.62E-18      |
| AT1G80490            | 39                            | 0                              | 1.74E-12      |
| AT1G80620            | 29                            | 0                              | 1.80E-09      |
| AT1G80690            | 14                            | 0                              | 6.00E-05      |
| AT2G01400            | 38                            | 0                              | 3.48E-12      |
| AT2G01490            | 61                            | 2                              | 2.11E-16      |
| AT2G01830            | 17                            | 0                              | 7.48E-06      |
| AT2G02090            | 36                            | 0                              | 1.39E-11      |
| AT2G02400            | 55                            | 0                              | 2.60E-17      |
| AT2G02740            | 37                            | 0                              | 6.96E-12      |
| AT2G02910            | 139                           | 4                              | 1.36E-36      |
| AT2G03270            | 12                            | 0                              | 2.41E-04      |
| AT2G03420            | 16                            | 0                              | 1.50E-05      |
| AT2G03550            | 53                            | 0                              | 1.04E-16      |
| AT2G03810            | 101                           | 0                              | 3.49E-31      |
| AT2G03840            | 31                            | 0                              | 4.49E-10      |
| AT2G04037            | 42                            | 0                              | 2.16E-13      |
| AT2G04039            | 17                            | 0                              | 7.48E-06      |
| AT2G04235            | 28                            | 0                              | 3.60E-09      |
| AT2G04280            | 25                            | 0                              | 2.89E-08      |
| AT2G06090            | 17                            | 0                              | 7.48E-06      |
| AT2G09800            | 21                            | 0                              | 4.65E-07      |
| AT2G10340            | 20                            | 0                              | 9.31E-07      |
| AT2G10405            | 16                            | 0                              | 1.50E-05      |
| AT2G11140            | 57                            | 1                              | 1.95E-16      |
| AT2G12462            | 26                            | 0                              | 1.44E-08      |
| AT2G13360            | 16                            | 0                              | 1.50E-05      |
| AT2G13610            | 38                            | 0                              | 3.48E-12      |



Supplementary Table 5

| Gene ID <sup>a</sup> | Raw transcriptional activity  |                                | Fisher pvalue |
|----------------------|-------------------------------|--------------------------------|---------------|
|                      | Wild Type ovules <sup>b</sup> | <i>sp</i> /ovules <sup>b</sup> |               |
| AT2G13960            | 22                            | 0                              | 2.32E-07      |
| AT2G14120            | 64                            | 3                              | 3.33E-16      |
| AT2G14170            | 101                           | 0                              | 3.49E-31      |
| AT2G14255            | 58                            | 0                              | 3.24E-18      |
| AT2G14560            | 17                            | 0                              | 7.48E-06      |
| AT2G15440            | 20                            | 0                              | 9.31E-07      |
| AT2G15695            | 95                            | 2                              | 2.75E-26      |
| AT2G15960            | 30                            | 0                              | 8.99E-10      |
| AT2G16050            | 25                            | 0                              | 2.89E-08      |
| AT2G16370            | 147                           | 2                              | 1.34E-41      |
| AT2G16400            | 21                            | 0                              | 4.65E-07      |
| AT2G16570            | 13                            | 0                              | 1.20E-04      |
| AT2G16800            | 19                            | 0                              | 1.86E-06      |
| AT2G17130            | 15                            | 0                              | 3.00E-05      |
| AT2G17210            | 20                            | 0                              | 9.31E-07      |
| AT2G17390            | 19                            | 0                              | 1.86E-06      |
| AT2G17420            | 38                            | 1                              | 7.15E-11      |
| AT2G17530            | 69                            | 0                              | 1.56E-21      |
| AT2G17570            | 41                            | 0                              | 4.33E-13      |
| AT2G18040            | 43                            | 0                              | 1.08E-13      |
| AT2G18330            | 40                            | 1                              | 1.87E-11      |
| AT2G18700            | 86                            | 2                              | 1.18E-23      |
| AT2G18890            | 15                            | 0                              | 3.00E-05      |
| AT2G19340            | 99                            | 5                              | 4.52E-24      |
| AT2G19660            | 21                            | 0                              | 4.65E-07      |
| AT2G19760            | 33                            | 0                              | 1.12E-10      |
| AT2G20050            | 28                            | 0                              | 3.60E-09      |
| AT2G20690            | 27                            | 0                              | 7.22E-09      |
| AT2G20790            | 102                           | 0                              | 1.74E-31      |
| AT2G20800            | 42                            | 0                              | 2.16E-13      |
| AT2G20960            | 15                            | 0                              | 3.00E-05      |
| AT2G21120            | 33                            | 0                              | 1.12E-10      |
| AT2G21250            | 96                            | 0                              | 1.12E-29      |
| AT2G21440            | 36                            | 0                              | 1.39E-11      |
| AT2G21540            | 15                            | 0                              | 3.00E-05      |
| AT2G21580            | 56                            | 0                              | 1.30E-17      |
| AT2G21655            | 48                            | 0                              | 3.36E-15      |
| AT2G22120            | 24                            | 0                              | 5.79E-08      |
| AT2G22170            | 38                            | 0                              | 3.48E-12      |
| AT2G22240            | 71                            | 0                              | 3.89E-22      |

Supplementary Table 5

| Gene ID <sup>a</sup> | Raw transcriptional activity  |                                |               |
|----------------------|-------------------------------|--------------------------------|---------------|
|                      | Wild Type ovules <sup>b</sup> | <i>sp</i> /ovules <sup>b</sup> | Fisher pvalue |
| AT2G22310            | 18                            | 0                              | 3.73E-06      |
| AT2G22490            | 19                            | 0                              | 1.86E-06      |
| AT2G22540            | 27                            | 0                              | 7.22E-09      |
| AT2G22650            | 32                            | 1                              | 3.94E-09      |
| AT2G22940            | 20                            | 0                              | 9.31E-07      |
| AT2G23040            | 13                            | 0                              | 1.20E-04      |
| AT2G23142            | 25                            | 0                              | 2.89E-08      |
| AT2G23310            | 22                            | 0                              | 2.32E-07      |
| AT2G23340            | 21                            | 0                              | 4.65E-07      |
| AT2G23460            | 52                            | 1                              | 5.76E-15      |
| AT2G23530            | 25                            | 0                              | 2.89E-08      |
| AT2G24205            | 18                            | 0                              | 3.73E-06      |
| AT2G24270            | 149                           | 0                              | 1.17E-45      |
| AT2G24360            | 20                            | 0                              | 9.31E-07      |
| AT2G24450            | 40                            | 0                              | 8.67E-13      |
| AT2G24830            | 15                            | 0                              | 3.00E-05      |
| AT2G25010            | 77                            | 0                              | 6.03E-24      |
| AT2G25300            | 70                            | 0                              | 7.79E-22      |
| AT2G25320            | 25                            | 3                              | 1.49E-05      |
| AT2G25590            | 96                            | 2                              | 1.40E-26      |
| AT2G25650            | 151                           | 2                              | 8.78E-43      |
| AT2G26080            | 91                            | 0                              | 3.62E-28      |
| AT2G26360            | 34                            | 0                              | 5.59E-11      |
| AT2G26450            | 13                            | 0                              | 1.20E-04      |
| AT2G26920            | 37                            | 0                              | 6.96E-12      |
| AT2G26970            | 22                            | 0                              | 2.32E-07      |
| AT2G27500            | 21                            | 0                              | 4.65E-07      |
| AT2G27900            | 43                            | 0                              | 1.08E-13      |
| AT2G28110            | 54                            | 2                              | 2.17E-14      |
| AT2G28380            | 36                            | 0                              | 1.39E-11      |
| AT2G28480            | 38                            | 0                              | 3.48E-12      |
| AT2G28680            | 25                            | 0                              | 2.89E-08      |
| AT2G28800            | 51                            | 1                              | 1.13E-14      |
| AT2G28930            | 18                            | 0                              | 3.73E-06      |
| AT2G29080            | 17                            | 0                              | 7.48E-06      |
| AT2G29200            | 27                            | 0                              | 7.22E-09      |
| AT2G29660            | 49                            | 0                              | 1.68E-15      |
| AT2G29700            | 34                            | 0                              | 5.59E-11      |
| AT2G29970            | 45                            | 0                              | 2.69E-14      |
| AT2G30200            | 26                            | 0                              | 1.44E-08      |

Supplementary Table 5

| Gene ID <sup>a</sup> | Raw transcriptional activity  |                                |               |
|----------------------|-------------------------------|--------------------------------|---------------|
|                      | Wild Type ovules <sup>b</sup> | <i>sp</i> /ovules <sup>b</sup> | Fisher pvalue |
| AT2G30270            | 33                            | 1                              | 2.02E-09      |
| AT2G30984            | 15                            | 0                              | 3.00E-05      |
| AT2G31141            | 32                            | 0                              | 2.24E-10      |
| AT2G31530            | 16                            | 0                              | 1.50E-05      |
| AT2G31870            | 42                            | 0                              | 2.16E-13      |
| AT2G31985            | 31                            | 0                              | 4.49E-10      |
| AT2G32400            | 47                            | 3                              | 1.88E-11      |
| AT2G32560            | 13                            | 0                              | 1.20E-04      |
| AT2G32600            | 58                            | 0                              | 3.24E-18      |
| AT2G32720            | 182                           | 0                              | 1.31E-55      |
| AT2G33400            | 128                           | 1                              | 1.66E-37      |
| AT2G33610            | 16                            | 0                              | 1.50E-05      |
| AT2G33775            | 23                            | 0                              | 1.16E-07      |
| AT2G33980            | 12                            | 0                              | 2.41E-04      |
| AT2G34670            | 11                            | 47                             | 2.03E-06      |
| AT2G34690            | 163                           | 4                              | 1.46E-43      |
| AT2G34700            | 22                            | 0                              | 2.32E-07      |
| AT2G35030            | 13                            | 0                              | 1.20E-04      |
| AT2G35240            | 42                            | 0                              | 2.16E-13      |
| AT2G35250            | 12                            | 0                              | 2.41E-04      |
| AT2G35330            | 113                           | 1                              | 4.89E-33      |
| AT2G35470            | 71                            | 2                              | 2.72E-19      |
| AT2G35550            | 42                            | 0                              | 2.16E-13      |
| AT2G35690            | 37                            | 1                              | 1.40E-10      |
| AT2G35840            | 34                            | 0                              | 5.59E-11      |
| AT2G36610            | 108                           | 0                              | 2.71E-33      |
| AT2G36810            | 17                            | 0                              | 7.48E-06      |
| AT2G36835            | 33                            | 0                              | 1.12E-10      |
| AT2G37050            | 43                            | 0                              | 1.08E-13      |
| AT2G37060            | 113                           | 1                              | 4.89E-33      |
| AT2G37120            | 45                            | 1                              | 6.49E-13      |
| AT2G37470            | 30                            | 0                              | 8.99E-10      |
| AT2G37520            | 33                            | 0                              | 1.12E-10      |
| AT2G37550            | 34                            | 0                              | 5.59E-11      |
| AT2G37640            | 34                            | 0                              | 5.59E-11      |
| AT2G37740            | 12                            | 0                              | 2.41E-04      |
| AT2G37840            | 24                            | 0                              | 5.79E-08      |
| AT2G37890            | 22                            | 0                              | 2.32E-07      |
| AT2G38140            | 67                            | 0                              | 6.25E-21      |
| AT2G38280            | 14                            | 0                              | 6.00E-05      |

Supplementary Table 5

| Gene ID <sup>a</sup> | Raw transcriptional activity  |                                |               |
|----------------------|-------------------------------|--------------------------------|---------------|
|                      | Wild Type ovules <sup>b</sup> | <i>sp</i> /ovules <sup>b</sup> | Fisher pvalue |
| AT2G38410            | 14                            | 0                              | 6.00E-05      |
| AT2G38630            | 38                            | 0                              | 3.48E-12      |
| AT2G38680            | 18                            | 0                              | 3.73E-06      |
| AT2G39140            | 12                            | 0                              | 2.41E-04      |
| AT2G39270            | 57                            | 0                              | 6.48E-18      |
| AT2G39390            | 105                           | 0                              | 2.17E-32      |
| AT2G39740            | 15                            | 0                              | 3.00E-05      |
| AT2G39930            | 250                           | 0                              | 4.07E-76      |
| AT2G40095            | 23                            | 0                              | 1.16E-07      |
| At2g40760            | 46                            | 0                              | 1.35E-14      |
| AT2G40765            | 61                            | 2                              | 2.11E-16      |
| AT2G40780            | 17                            | 0                              | 7.48E-06      |
| AT2G40880            | 12                            | 0                              | 2.41E-04      |
| AT2G40935            | 44                            | 0                              | 5.39E-14      |
| AT2G40950            | 70                            | 2                              | 5.30E-19      |
| AT2G41070            | 29                            | 0                              | 1.80E-09      |
| AT2G41650            | 12                            | 0                              | 2.41E-04      |
| AT2G41710            | 199                           | 5                              | 9.17E-53      |
| AT2G42005            | 118                           | 0                              | 2.61E-36      |
| AT2G42070            | 23                            | 0                              | 1.16E-07      |
| AT2G42570            | 75                            | 1                              | 9.47E-22      |
| AT2G42590            | 125                           | 0                              | 2.02E-38      |
| AT2G42620            | 43                            | 0                              | 1.08E-13      |
| AT2G42640            | 39                            | 0                              | 1.74E-12      |
| AT2G42650            | 79                            | 0                              | 1.50E-24      |
| AT2G42740            | 86                            | 0                              | 1.17E-26      |
| AT2G43230            | 62                            | 0                              | 2.01E-19      |
| AT2G43250            | 36                            | 0                              | 1.39E-11      |
| AT2G43330            | 44                            | 0                              | 5.39E-14      |
| AT2G43530            | 38                            | 2                              | 7.54E-10      |
| AT2G44440            | 55                            | 0                              | 2.60E-17      |
| AT2G44490            | 47                            | 0                              | 6.72E-15      |
| AT2G44740            | 32                            | 0                              | 2.24E-10      |
| AT2G45160            | 197                           | 10                             | 1.40E-46      |
| AT2G45260            | 16                            | 0                              | 1.50E-05      |
| AT2G45720            | 38                            | 1                              | 7.15E-11      |
| AT2G45870            | 48                            | 0                              | 3.36E-15      |
| AT2G46020            | 32                            | 0                              | 2.24E-10      |
| AT2G46030            | 69                            | 1                              | 5.64E-20      |
| AT2G46040            | 23                            | 0                              | 1.16E-07      |

Supplementary Table 5

| Gene ID <sup>a</sup> | Raw transcriptional activity  |                                | Fisher pvalue |
|----------------------|-------------------------------|--------------------------------|---------------|
|                      | Wild Type ovules <sup>b</sup> | <i>sp</i> /ovules <sup>b</sup> |               |
| AT2G46200            | 42                            | 0                              | 2.16E-13      |
| AT2G46490            | 152                           | 5                              | 3.69E-39      |
| AT2G46590            | 68                            | 0                              | 3.12E-21      |
| AT2G46830            | 68                            | 0                              | 3.12E-21      |
| AT2G46950            | 30                            | 0                              | 8.99E-10      |
| AT2G47010            | 44                            | 0                              | 5.39E-14      |
| AT2G47030            | 15                            | 0                              | 3.00E-05      |
| AT2G47180            | 23                            | 0                              | 1.16E-07      |
| AT2G47400            | 350                           | 13                             | 9.67E-87      |
| AT2G47420            | 80                            | 0                              | 7.52E-25      |
| AT2G47450            | 66                            | 2                              | 7.62E-18      |
| AT2G47900            | 27                            | 0                              | 7.22E-09      |
| AT2G48030            | 23                            | 0                              | 1.16E-07      |
| AT3G01230            | 29                            | 0                              | 1.80E-09      |
| AT3G01270            | 22                            | 0                              | 2.32E-07      |
| AT3G01330            | 34                            | 0                              | 5.59E-11      |
| AT3G01380            | 23                            | 1                              | 1.51E-06      |
| AT3G01410            | 52                            | 0                              | 2.09E-16      |
| AT3G01460            | 69                            | 0                              | 1.56E-21      |
| AT3G01740            | 151                           | 0                              | 2.92E-46      |
| AT3G01760            | 32                            | 0                              | 2.24E-10      |
| AT3G01810            | 30                            | 0                              | 8.99E-10      |
| AT3G02065            | 29                            | 0                              | 1.80E-09      |
| AT3G02070            | 31                            | 1                              | 7.66E-09      |
| AT3G02100            | 21                            | 0                              | 4.65E-07      |
| AT3G02180            | 88                            | 1                              | 1.33E-25      |
| AT3G02340            | 22                            | 0                              | 2.32E-07      |
| AT3G02460            | 75                            | 0                              | 2.42E-23      |
| AT3G02560            | 73                            | 1                              | 3.70E-21      |
| AT3G02970            | 13                            | 0                              | 1.20E-04      |
| AT3G03170            | 13                            | 0                              | 1.20E-04      |
| AT3G03272            | 24                            | 0                              | 5.79E-08      |
| AT3G03440            | 27                            | 0                              | 7.22E-09      |
| AT3G03630            | 26                            | 0                              | 1.44E-08      |
| AT3G04040            | 56                            | 0                              | 1.30E-17      |
| AT3G04090            | 90                            | 0                              | 7.25E-28      |
| AT3G04350            | 30                            | 0                              | 8.99E-10      |
| AT3G04460            | 15                            | 0                              | 3.00E-05      |
| AT3G04605            | 22                            | 0                              | 2.32E-07      |
| AT3G04640            | 44                            | 0                              | 5.39E-14      |

Supplementary Table 5

| Gene ID <sup>a</sup> | Raw transcriptional activity  |                                |               |
|----------------------|-------------------------------|--------------------------------|---------------|
|                      | Wild Type ovules <sup>b</sup> | <i>sp</i> /ovules <sup>b</sup> | Fisher pvalue |
| AT3G04700            | 30                            | 0                              | 8.99E-10      |
| AT3G04780            | 86                            | 3                              | 1.79E-22      |
| AT3G05050            | 13                            | 0                              | 1.20E-04      |
| AT3G05460            | 25                            | 0                              | 2.89E-08      |
| AT3G05685            | 73                            | 4                              | 9.26E-18      |
| AT3G05720            | 41                            | 0                              | 4.33E-13      |
| AT3G05770            | 20                            | 0                              | 9.31E-07      |
| AT3G05970            | 14                            | 0                              | 6.00E-05      |
| AT3G06000            | 29                            | 0                              | 1.80E-09      |
| AT3G06020            | 13                            | 0                              | 1.20E-04      |
| AT3G06300            | 17                            | 0                              | 7.48E-06      |
| AT3G06420            | 42                            | 1                              | 4.88E-12      |
| AT3G06580            | 46                            | 0                              | 1.35E-14      |
| AT3G06660            | 42                            | 2                              | 5.64E-11      |
| AT3G06778            | 34                            | 0                              | 5.59E-11      |
| AT3G06780            | 25                            | 0                              | 2.89E-08      |
| AT3G06790            | 77                            | 0                              | 6.03E-24      |
| AT3G06940            | 13                            | 0                              | 1.20E-04      |
| AT3G07005            | 31                            | 0                              | 4.49E-10      |
| AT3G07160            | 121                           | 0                              | 3.25E-37      |
| AT3G07370            | 29                            | 0                              | 1.80E-09      |
| AT3G07460            | 116                           | 0                              | 1.05E-35      |
| AT3G07520            | 29                            | 0                              | 1.80E-09      |
| AT3G07820            | 12                            | 0                              | 2.41E-04      |
| AT3G07880            | 37                            | 1                              | 1.40E-10      |
| AT3G08960            | 85                            | 0                              | 2.33E-26      |
| AT3G09035            | 49                            | 0                              | 1.68E-15      |
| AT3G09070            | 70                            | 0                              | 7.79E-22      |
| AT3G09740            | 166                           | 7                              | 6.21E-41      |
| AT3G09770            | 39                            | 0                              | 1.74E-12      |
| AT3G09900            | 43                            | 0                              | 1.08E-13      |
| AT3G10250            | 25                            | 0                              | 2.89E-08      |
| AT3G10410            | 24                            | 0                              | 5.79E-08      |
| AT3G10420            | 39                            | 1                              | 3.66E-11      |
| AT3G10760            | 21                            | 0                              | 4.65E-07      |
| AT3G11420            | 29                            | 0                              | 1.80E-09      |
| AT3G11590            | 29                            | 0                              | 1.80E-09      |
| AT3G11890            | 20                            | 0                              | 9.31E-07      |
| AT3G12100            | 27                            | 0                              | 7.22E-09      |
| AT3G12180            | 12                            | 0                              | 2.41E-04      |

Supplementary Table 5

| Gene ID <sup>a</sup> | Raw transcriptional activity  |                                | Fisher pvalue |
|----------------------|-------------------------------|--------------------------------|---------------|
|                      | Wild Type ovules <sup>b</sup> | <i>sp</i> /ovules <sup>b</sup> |               |
| AT3G12260            | 73                            | 0                              | 9.70E-23      |
| AT3G12350            | 69                            | 0                              | 1.56E-21      |
| AT3G12360            | 51                            | 0                              | 4.18E-16      |
| AT3G12530            | 13                            | 0                              | 1.20E-04      |
| AT3G12560            | 42                            | 1                              | 4.88E-12      |
| AT3G12690            | 13                            | 0                              | 1.20E-04      |
| AT3G12820            | 28                            | 0                              | 3.60E-09      |
| AT3G12930            | 45                            | 1                              | 6.49E-13      |
| AT3G13030            | 43                            | 0                              | 1.08E-13      |
| AT3G13050            | 21                            | 0                              | 4.65E-07      |
| AT3G13120            | 62                            | 0                              | 2.01E-19      |
| AT3G13350            | 44                            | 0                              | 5.39E-14      |
| AT3G13360            | 74                            | 0                              | 4.85E-23      |
| AT3G13390            | 19                            | 0                              | 1.86E-06      |
| AT3G13440            | 15                            | 1                              | 2.71E-04      |
| AT3G13570            | 27                            | 0                              | 7.22E-09      |
| AT3G13782            | 17                            | 0                              | 7.48E-06      |
| AT3G14090            | 13                            | 0                              | 1.20E-04      |
| AT3G14100            | 122                           | 0                              | 1.62E-37      |
| AT3G14380            | 23                            | 0                              | 1.16E-07      |
| AT3G15030            | 20                            | 0                              | 9.31E-07      |
| AT3G15160            | 22                            | 0                              | 2.32E-07      |
| AT3G15355            | 16                            | 0                              | 1.50E-05      |
| AT3G15450            | 426                           | 11                             | 4.50E-111     |
| AT3G15630            | 160                           | 0                              | 5.64E-49      |
| AT3G16020            | 18                            | 0                              | 3.73E-06      |
| AT3G16130            | 38                            | 0                              | 3.48E-12      |
| AT3G16190            | 48                            | 0                              | 3.36E-15      |
| AT3G16200            | 46                            | 0                              | 1.35E-14      |
| AT3G16220            | 20                            | 0                              | 9.31E-07      |
| AT3G16480            | 20                            | 0                              | 9.31E-07      |
| AT3G16730            | 43                            | 1                              | 2.49E-12      |
| AT3G16850            | 91                            | 1                              | 1.71E-26      |
| AT3G17030            | 59                            | 0                              | 1.62E-18      |
| AT3G17160            | 166                           | 0                              | 8.74E-51      |
| AT3G17205            | 17                            | 0                              | 7.48E-06      |
| AT3G17210            | 19                            | 0                              | 1.86E-06      |
| AT3G17450            | 38                            | 1                              | 7.15E-11      |
| AT3G17970            | 34                            | 0                              | 5.59E-11      |
| AT3G18350            | 14                            | 0                              | 6.00E-05      |

Supplementary Table 5

| Gene ID <sup>a</sup> | Raw transcriptional activity  |                                |               |
|----------------------|-------------------------------|--------------------------------|---------------|
|                      | Wild Type ovules <sup>b</sup> | <i>sp</i> /ovules <sup>b</sup> | Fisher pvalue |
| AT3G18480            | 53                            | 0                              | 1.04E-16      |
| AT3G18535            | 33                            | 0                              | 1.12E-10      |
| AT3G19360            | 22                            | 0                              | 2.32E-07      |
| AT3G19970            | 22                            | 0                              | 2.32E-07      |
| AT3G20170            | 56                            | 0                              | 1.30E-17      |
| AT3G20250            | 69                            | 1                              | 5.64E-20      |
| AT3G20395            | 40                            | 0                              | 8.67E-13      |
| AT3G20540            | 65                            | 0                              | 2.51E-20      |
| AT3G20650            | 47                            | 0                              | 6.72E-15      |
| AT3G20680            | 20                            | 0                              | 9.31E-07      |
| AT3G20720            | 67                            | 0                              | 6.25E-21      |
| AT3G20890            | 39                            | 1                              | 3.66E-11      |
| AT3G20920            | 19                            | 0                              | 1.86E-06      |
| AT3G20970            | 59                            | 0                              | 1.62E-18      |
| AT3G21055            | 34                            | 0                              | 5.59E-11      |
| AT3G21175            | 37                            | 1                              | 1.40E-10      |
| AT3G21215            | 36                            | 0                              | 1.39E-11      |
| AT3G21630            | 30                            | 0                              | 8.99E-10      |
| AT3G21740            | 125                           | 0                              | 2.02E-38      |
| AT3G22160            | 21                            | 0                              | 4.65E-07      |
| AT3G22425            | 19                            | 0                              | 1.86E-06      |
| AT3G22430            | 26                            | 0                              | 1.44E-08      |
| AT3G22760            | 46                            | 0                              | 1.35E-14      |
| AT3G22810            | 12                            | 0                              | 2.41E-04      |
| AT3G22880            | 73                            | 3                              | 9.33E-19      |
| AT3G23030            | 20                            | 0                              | 9.31E-07      |
| AT3G23080            | 41                            | 1                              | 9.56E-12      |
| AT3G23100            | 27                            | 0                              | 7.22E-09      |
| AT3G23710            | 36                            | 1                              | 2.73E-10      |
| AT3G23805            | 48                            | 0                              | 3.36E-15      |
| AT3G24230            | 162                           | 4                              | 2.86E-43      |
| AT3G24480            | 117                           | 1                              | 3.15E-34      |
| AT3G24510            | 189                           | 5                              | 7.40E-50      |
| AT3G24927            | 38                            | 0                              | 3.48E-12      |
| AT3G25260            | 16                            | 0                              | 1.50E-05      |
| AT3G25590            | 12                            | 0                              | 2.41E-04      |
| AT3G25717            | 25                            | 0                              | 2.89E-08      |
| AT3G26020            | 17                            | 0                              | 7.48E-06      |
| AT3G26070            | 92                            | 3                              | 3.37E-24      |
| AT3G26410            | 17                            | 0                              | 7.48E-06      |



Supplementary Table 5

| Gene ID <sup>a</sup> | Raw transcriptional activity  |                                | Fisher pvalue |
|----------------------|-------------------------------|--------------------------------|---------------|
|                      | Wild Type ovules <sup>b</sup> | <i>sp</i> /ovules <sup>b</sup> |               |
| AT3G26618            | 12                            | 0                              | 2.41E-04      |
| AT3G26910            | 31                            | 0                              | 4.49E-10      |
| AT3G27300            | 41                            | 0                              | 4.33E-13      |
| AT3G27990            | 19                            | 0                              | 1.86E-06      |
| AT3G28050            | 18                            | 0                              | 3.73E-06      |
| AT3G28345            | 24                            | 0                              | 5.79E-08      |
| AT3G28450            | 42                            | 1                              | 4.88E-12      |
| AT3G28560            | 13                            | 0                              | 1.20E-04      |
| AT3G28690            | 20                            | 0                              | 9.31E-07      |
| AT3G28840            | 33                            | 0                              | 1.12E-10      |
| AT3G28917            | 15                            | 0                              | 3.00E-05      |
| AT3G28970            | 12                            | 0                              | 2.41E-04      |
| AT3G28980            | 23                            | 0                              | 1.16E-07      |
| AT3G29020            | 13                            | 0                              | 1.20E-04      |
| AT3G29160            | 58                            | 0                              | 3.24E-18      |
| AT3G29260            | 19                            | 0                              | 1.86E-06      |
| AT3G29270            | 16                            | 0                              | 1.50E-05      |
| AT3G29370            | 14                            | 0                              | 6.00E-05      |
| AT3G29375            | 22                            | 0                              | 2.32E-07      |
| AT3G42670            | 30                            | 0                              | 8.99E-10      |
| AT3G43220            | 39                            | 2                              | 3.95E-10      |
| AT3G43850            | 29                            | 0                              | 1.80E-09      |
| AT3G43860            | 29                            | 0                              | 1.80E-09      |
| AT3G44330            | 22                            | 0                              | 2.32E-07      |
| AT3G44735            | 14                            | 0                              | 6.00E-05      |
| AT3G44850            | 26                            | 0                              | 1.44E-08      |
| AT3G45040            | 29                            | 0                              | 1.80E-09      |
| AT3G46668            | 23                            | 0                              | 1.16E-07      |
| AT3G47342            | 41                            | 0                              | 4.33E-13      |
| AT3G47450            | 36                            | 0                              | 1.39E-11      |
| AT3G47620            | 16                            | 0                              | 1.50E-05      |
| AT3G47730            | 30                            | 0                              | 8.99E-10      |
| AT3G48030            | 50                            | 0                              | 8.37E-16      |
| AT3G48530            | 26                            | 0                              | 1.44E-08      |
| AT3G48610            | 15                            | 0                              | 3.00E-05      |
| AT3G48690            | 23                            | 0                              | 1.16E-07      |
| AT3G48860            | 72                            | 0                              | 1.94E-22      |
| AT3G48880            | 17                            | 0                              | 7.48E-06      |
| AT3G48890            | 23                            | 0                              | 1.16E-07      |
| AT3G48950            | 14                            | 0                              | 6.00E-05      |

Supplementary Table 5

| Gene ID <sup>a</sup> | Raw transcriptional activity  |                                | Fisher pvalue |
|----------------------|-------------------------------|--------------------------------|---------------|
|                      | Wild Type ovules <sup>b</sup> | <i>sp</i> /ovules <sup>b</sup> |               |
| AT3G49050            | 18                            | 0                              | 3.73E-06      |
| AT3G49051            | 36                            | 0                              | 1.39E-11      |
| AT3G49100            | 28                            | 0                              | 3.60E-09      |
| AT3G49350            | 12                            | 0                              | 2.41E-04      |
| AT3G49420            | 63                            | 0                              | 1.01E-19      |
| AT3G49920            | 12                            | 0                              | 2.41E-04      |
| AT3G50050            | 13                            | 0                              | 1.20E-04      |
| AT3G50665            | 29                            | 0                              | 1.80E-09      |
| AT3G51440            | 31                            | 0                              | 4.49E-10      |
| AT3G51450            | 35                            | 0                              | 2.79E-11      |
| AT3G51500            | 12                            | 0                              | 2.41E-04      |
| AT3G51980            | 61                            | 0                              | 4.03E-19      |
| AT3G52060            | 12                            | 0                              | 2.41E-04      |
| AT3G52070            | 57                            | 0                              | 6.48E-18      |
| AT3G52072            | 23                            | 0                              | 1.16E-07      |
| AT3G52280            | 15                            | 0                              | 3.00E-05      |
| AT3G52290            | 39                            | 0                              | 1.74E-12      |
| AT3G52560            | 170                           | 2                              | 2.06E-48      |
| AT3G52800            | 28                            | 0                              | 3.60E-09      |
| AT3G53110            | 16                            | 0                              | 1.50E-05      |
| AT3G53340            | 103                           | 0                              | 8.71E-32      |
| AT3G53420            | 172                           | 0                              | 1.36E-52      |
| AT3G53620            | 17                            | 0                              | 7.48E-06      |
| AT3G54420            | 37                            | 0                              | 6.96E-12      |
| AT3G55060            | 47                            | 0                              | 6.72E-15      |
| AT3G56010            | 16                            | 0                              | 1.50E-05      |
| AT3G56030            | 13                            | 0                              | 1.20E-04      |
| AT3G56070            | 34                            | 0                              | 5.59E-11      |
| AT3G56110            | 109                           | 3                              | 4.11E-29      |
| AT3G56170            | 24                            | 0                              | 5.79E-08      |
| AT3G56180            | 15                            | 0                              | 3.00E-05      |
| AT3G57060            | 46                            | 0                              | 1.35E-14      |
| AT3G57280            | 20                            | 0                              | 9.31E-07      |
| AT3G57420            | 74                            | 0                              | 4.85E-23      |
| AT3G57550            | 20                            | 0                              | 9.31E-07      |
| AT3G58010            | 16                            | 0                              | 1.50E-05      |
| AT3G58110            | 23                            | 0                              | 1.16E-07      |
| AT3G58580            | 30                            | 0                              | 8.99E-10      |
| AT3G58660            | 20                            | 0                              | 9.31E-07      |
| AT3G58710            | 28                            | 0                              | 3.60E-09      |

Supplementary Table 5

| Gene ID <sup>a</sup> | Raw transcriptional activity  |                                | Fisher pvalue |
|----------------------|-------------------------------|--------------------------------|---------------|
|                      | Wild Type ovules <sup>b</sup> | <i>sp</i> /ovules <sup>b</sup> |               |
| AT3G58760            | 14                            | 0                              | 6.00E-05      |
| AT3G59260            | 23                            | 0                              | 1.16E-07      |
| AT3G59390            | 16                            | 0                              | 1.50E-05      |
| AT3G59430            | 43                            | 2                              | 2.94E-11      |
| AT3G59630            | 18                            | 0                              | 3.73E-06      |
| AT3G59660            | 54                            | 1                              | 1.49E-15      |
| AT3G59960            | 53                            | 0                              | 1.04E-16      |
| AT3G60140            | 16                            | 0                              | 1.50E-05      |
| AT3G60500            | 41                            | 0                              | 4.33E-13      |
| AT3G60520            | 36                            | 0                              | 1.39E-11      |
| AT3G60900            | 68                            | 0                              | 3.12E-21      |
| AT3G60965            | 39                            | 2                              | 3.95E-10      |
| AT3G61060            | 192                           | 0                              | 1.26E-58      |
| AT3G61070            | 67                            | 4                              | 4.32E-16      |
| AT3G61120            | 41                            | 0                              | 4.33E-13      |
| AT3G61160            | 43                            | 0                              | 1.08E-13      |
| AT3G61300            | 48                            | 1                              | 8.59E-14      |
| AT3G61420            | 13                            | 0                              | 1.20E-04      |
| AT3G61570            | 15                            | 0                              | 3.00E-05      |
| AT3G61710            | 33                            | 0                              | 1.12E-10      |
| AT3G61860            | 57                            | 2                              | 2.99E-15      |
| AT3G62060            | 19                            | 0                              | 1.86E-06      |
| AT3G62310            | 131                           | 1                              | 2.11E-38      |
| AT3G62400            | 16                            | 0                              | 1.50E-05      |
| AT3G62420            | 236                           | 0                              | 6.78E-72      |
| AT3G62860            | 14                            | 0                              | 6.00E-05      |
| AT3G63000            | 55                            | 0                              | 2.60E-17      |
| AT3G63010            | 110                           | 2                              | 1.10E-30      |
| AT3G63440            | 38                            | 0                              | 3.48E-12      |
| AT3G63450            | 81                            | 7                              | 2.26E-17      |
| AT4G00030            | 14                            | 0                              | 6.00E-05      |
| AT4G00120            | 14                            | 0                              | 6.00E-05      |
| AT4G00270            | 79                            | 0                              | 1.50E-24      |
| AT4G00380            | 17                            | 0                              | 7.48E-06      |
| AT4G00450            | 37                            | 0                              | 6.96E-12      |
| AT4G00467            | 56                            | 0                              | 1.30E-17      |
| AT4G00905            | 52                            | 2                              | 8.10E-14      |
| AT4G01180            | 14                            | 0                              | 6.00E-05      |
| AT4G01200            | 18                            | 0                              | 3.73E-06      |
| AT4G01250            | 29                            | 0                              | 1.80E-09      |

Supplementary Table 5

| Gene ID <sup>a</sup> | Raw transcriptional activity  |                                | Fisher pvalue |
|----------------------|-------------------------------|--------------------------------|---------------|
|                      | Wild Type ovules <sup>b</sup> | <i>sp</i> /ovules <sup>b</sup> |               |
| AT4G01710            | 65                            | 1                              | 8.56E-19      |
| AT4G01897            | 39                            | 0                              | 1.74E-12      |
| AT4G02040            | 34                            | 0                              | 5.59E-11      |
| AT4G02060            | 114                           | 1                              | 2.46E-33      |
| AT4G02200            | 19                            | 0                              | 1.86E-06      |
| AT4G02250            | 30                            | 0                              | 8.99E-10      |
| AT4G02400            | 33                            | 0                              | 1.12E-10      |
| AT4G02440            | 53                            | 2                              | 4.19E-14      |
| AT4G02630            | 22                            | 0                              | 2.32E-07      |
| At4g02650            | 139                           | 0                              | 1.21E-42      |
| AT4G02655            | 139                           | 0                              | 1.21E-42      |
| AT4G02800            | 15                            | 0                              | 3.00E-05      |
| AT4G02840            | 74                            | 0                              | 4.85E-23      |
| AT4G02940            | 15                            | 0                              | 3.00E-05      |
| AT4G03140            | 31                            | 0                              | 4.49E-10      |
| AT4G03230            | 30                            | 0                              | 8.99E-10      |
| AT4G03240            | 24                            | 0                              | 5.79E-08      |
| AT4G03960            | 15                            | 0                              | 3.00E-05      |
| AT4G04320            | 12                            | 0                              | 2.41E-04      |
| AT4G04610            | 77                            | 1                              | 2.42E-22      |
| AT4G04670            | 70                            | 3                              | 6.65E-18      |
| AT4G04870            | 83                            | 0                              | 9.36E-26      |
| AT4G05020            | 63                            | 0                              | 1.01E-19      |
| AT4G05410            | 84                            | 3                              | 6.71E-22      |
| AT4G07390            | 68                            | 0                              | 3.12E-21      |
| AT4G08240            | 15                            | 0                              | 3.00E-05      |
| AT4G08690            | 20                            | 0                              | 9.31E-07      |
| AT4G08810            | 130                           | 2                              | 1.41E-36      |
| AT4G08980            | 16                            | 0                              | 1.50E-05      |
| AT4G09153            | 44                            | 0                              | 5.39E-14      |
| AT4G09530            | 26                            | 0                              | 1.44E-08      |
| AT4G10040            | 15                            | 0                              | 3.00E-05      |
| AT4G10650            | 29                            | 0                              | 1.80E-09      |
| AT4G10710            | 112                           | 0                              | 1.68E-34      |
| AT4G11060            | 42                            | 0                              | 2.16E-13      |
| AT4G11090            | 83                            | 0                              | 9.36E-26      |
| AT4G11330            | 22                            | 0                              | 2.32E-07      |
| AT4G11570            | 23                            | 0                              | 1.16E-07      |
| AT4G11760            | 79                            | 0                              | 1.50E-24      |
| AT4G11790            | 60                            | 0                              | 8.07E-19      |

Supplementary Table 5

| Gene ID <sup>a</sup> | Raw transcriptional activity  |                                | Fisher pvalue |
|----------------------|-------------------------------|--------------------------------|---------------|
|                      | Wild Type ovules <sup>b</sup> | <i>sp</i> /ovules <sup>b</sup> |               |
| AT4G11800            | 42                            | 1                              | 4.88E-12      |
| AT4G11960            | 22                            | 0                              | 2.32E-07      |
| AT4G11980            | 27                            | 0                              | 7.22E-09      |
| AT4G12130            | 43                            | 0                              | 1.08E-13      |
| AT4G12340            | 40                            | 1                              | 1.87E-11      |
| AT4G12650            | 95                            | 0                              | 2.25E-29      |
| AT4G12860            | 25                            | 0                              | 2.89E-08      |
| AT4G13230            | 15                            | 0                              | 3.00E-05      |
| AT4G13270            | 25                            | 0                              | 2.89E-08      |
| AT4G13690            | 63                            | 0                              | 1.01E-19      |
| AT4G13780            | 72                            | 1                              | 7.31E-21      |
| AT4G14070            | 12                            | 0                              | 2.41E-04      |
| AT4G14110            | 13                            | 0                              | 1.20E-04      |
| AT4G14210            | 38                            | 1                              | 7.15E-11      |
| AT4G14340            | 14                            | 0                              | 6.00E-05      |
| AT4G14342            | 35                            | 0                              | 2.79E-11      |
| AT4G14570            | 81                            | 0                              | 3.75E-25      |
| AT4G14760            | 160                           | 3                              | 5.24E-44      |
| AT4G14900            | 28                            | 0                              | 3.60E-09      |
| AT4G14950            | 115                           | 0                              | 2.10E-35      |
| AT4G14960            | 37                            | 0                              | 6.96E-12      |
| AT4G15010            | 47                            | 0                              | 6.72E-15      |
| AT4G15640            | 18                            | 0                              | 3.73E-06      |
| AT4G15750            | 37                            | 0                              | 6.96E-12      |
| AT4G15885            | 25                            | 0                              | 2.89E-08      |
| AT4G15940            | 90                            | 2                              | 7.98E-25      |
| AT4G15955            | 59                            | 0                              | 1.62E-18      |
| AT4G16155            | 37                            | 0                              | 6.96E-12      |
| AT4G16480            | 53                            | 0                              | 1.04E-16      |
| AT4G16515            | 19                            | 0                              | 1.86E-06      |
| AT4G16570            | 69                            | 0                              | 1.56E-21      |
| AT4G16640            | 24                            | 0                              | 5.79E-08      |
| AT4G16710            | 40                            | 0                              | 8.67E-13      |
| AT4G16980            | 17                            | 0                              | 7.48E-06      |
| AT4G17180            | 16                            | 0                              | 1.50E-05      |
| AT4G17270            | 12                            | 0                              | 2.41E-04      |
| AT4G17695            | 16                            | 0                              | 1.50E-05      |
| AT4G18060            | 92                            | 0                              | 1.81E-28      |
| AT4G18375            | 63                            | 0                              | 1.01E-19      |
| AT4G18970            | 104                           | 5                              | 1.78E-25      |

Supplementary Table 5

| Gene ID <sup>a</sup> | Raw transcriptional activity  |                                | Fisher pvalue |
|----------------------|-------------------------------|--------------------------------|---------------|
|                      | Wild Type ovules <sup>b</sup> | <i>sp</i> /ovules <sup>b</sup> |               |
| AT4G19020            | 39                            | 1                              | 3.66E-11      |
| AT4G19090            | 30                            | 0                              | 8.99E-10      |
| AT4G19185            | 63                            | 0                              | 1.01E-19      |
| AT4G19191            | 43                            | 0                              | 1.08E-13      |
| AT4G19220            | 25                            | 0                              | 2.89E-08      |
| AT4G19400            | 35                            | 1                              | 5.32E-10      |
| AT4G19490            | 52                            | 1                              | 5.76E-15      |
| AT4G19870            | 33                            | 0                              | 1.12E-10      |
| AT4G20130            | 166                           | 4                              | 1.96E-44      |
| AT4G20150            | 342                           | 0                              | 7.30E-104     |
| AT4G20362            | 15                            | 0                              | 3.00E-05      |
| AT4G20410            | 38                            | 0                              | 3.48E-12      |
| AT4G20820            | 20                            | 0                              | 9.31E-07      |
| AT4G21150            | 59                            | 1                              | 5.03E-17      |
| AT4G21170            | 20                            | 0                              | 9.31E-07      |
| AT4G21350            | 19                            | 0                              | 1.86E-06      |
| AT4G21610            | 51                            | 1                              | 1.13E-14      |
| AT4G21630            | 107                           | 0                              | 5.42E-33      |
| AT4G21710            | 95                            | 0                              | 2.25E-29      |
| AT4G21730            | 34                            | 0                              | 5.59E-11      |
| AT4G21790            | 166                           | 1                              | 7.42E-49      |
| AT4G21880            | 12                            | 0                              | 2.41E-04      |
| AT4G22105            | 116                           | 0                              | 1.05E-35      |
| AT4G22200            | 13                            | 0                              | 1.20E-04      |
| AT4G22280            | 17                            | 0                              | 7.48E-06      |
| AT4G22390            | 39                            | 0                              | 1.74E-12      |
| AT4G22830            | 12                            | 0                              | 2.41E-04      |
| AT4G23400            | 12                            | 0                              | 2.41E-04      |
| AT4G23520            | 14                            | 0                              | 6.00E-05      |
| AT4G23530            | 19                            | 0                              | 1.86E-06      |
| AT4G23740            | 16                            | 0                              | 1.50E-05      |
| AT4G23940            | 30                            | 0                              | 8.99E-10      |
| AT4G23960            | 26                            | 0                              | 1.44E-08      |
| AT4G24080            | 21                            | 0                              | 4.65E-07      |
| AT4G24750            | 34                            | 0                              | 5.59E-11      |
| AT4G25120            | 44                            | 0                              | 5.39E-14      |
| AT4G25520            | 12                            | 0                              | 2.41E-04      |
| AT4G25570            | 97                            | 1                              | 2.82E-28      |
| AT4G25700            | 68                            | 1                              | 1.11E-19      |
| AT4G25770            | 29                            | 0                              | 1.80E-09      |

Supplementary Table 5

| Gene ID <sup>a</sup> | Raw transcriptional activity  |                                |               |
|----------------------|-------------------------------|--------------------------------|---------------|
|                      | Wild Type ovules <sup>b</sup> | <i>sp</i> /ovules <sup>b</sup> | Fisher pvalue |
| AT4G25840            | 15                            | 0                              | 3.00E-05      |
| AT4G25850            | 12                            | 0                              | 2.41E-04      |
| AT4G26070            | 15                            | 0                              | 3.00E-05      |
| AT4G26180            | 12                            | 0                              | 2.41E-04      |
| AT4G26500            | 40                            | 2                              | 2.07E-10      |
| AT4G26550            | 29                            | 0                              | 1.80E-09      |
| AT4G26610            | 26                            | 0                              | 1.44E-08      |
| AT4G26640            | 24                            | 0                              | 5.79E-08      |
| AT4G26660            | 36                            | 0                              | 1.39E-11      |
| AT4G27090            | 62                            | 2                              | 1.09E-16      |
| AT4G27270            | 29                            | 0                              | 1.80E-09      |
| AT4G27280            | 72                            | 4                              | 1.76E-17      |
| AT4G27350            | 19                            | 0                              | 1.86E-06      |
| AT4G27540            | 35                            | 0                              | 2.79E-11      |
| AT4G27580            | 28                            | 0                              | 3.60E-09      |
| AT4G27654            | 43                            | 1                              | 2.49E-12      |
| AT4G27660            | 50                            | 0                              | 8.37E-16      |
| AT4G28010            | 20                            | 0                              | 9.31E-07      |
| AT4G28020            | 132                           | 0                              | 1.57E-40      |
| AT4G28290            | 17                            | 0                              | 7.48E-06      |
| AT4G28610            | 258                           | 3                              | 5.97E-73      |
| AT4G28630            | 30                            | 0                              | 8.99E-10      |
| AT4G28730            | 35                            | 0                              | 2.79E-11      |
| AT4G28775            | 40                            | 0                              | 8.67E-13      |
| AT4G28950            | 19                            | 0                              | 1.86E-06      |
| AT4G29100            | 32                            | 0                              | 2.24E-10      |
| AT4G29160            | 57                            | 1                              | 1.95E-16      |
| AT4G29340            | 25                            | 0                              | 2.89E-08      |
| AT4G29735            | 340                           | 6                              | 1.11E-92      |
| AT4G29810            | 37                            | 0                              | 6.96E-12      |
| AT4G29960            | 19                            | 0                              | 1.86E-06      |
| AT4G29990            | 14                            | 0                              | 6.00E-05      |
| AT4G30190            | 13                            | 0                              | 1.20E-04      |
| AT4G30220            | 47                            | 2                              | 2.16E-12      |
| AT4G30360            | 16                            | 0                              | 1.50E-05      |
| AT4G30430            | 13                            | 0                              | 1.20E-04      |
| AT4G30600            | 68                            | 1                              | 1.11E-19      |
| AT4G30610            | 33                            | 0                              | 1.12E-10      |
| AT4G30662            | 51                            | 0                              | 4.18E-16      |
| AT4G30970            | 26                            | 0                              | 1.44E-08      |

Supplementary Table 5

| Gene ID <sup>a</sup> | Raw transcriptional activity  |                                | Fisher pvalue |
|----------------------|-------------------------------|--------------------------------|---------------|
|                      | Wild Type ovules <sup>b</sup> | <i>sp</i> /ovules <sup>b</sup> |               |
| AT4G31010            | 28                            | 0                              | 3.60E-09      |
| AT4G31040            | 17                            | 0                              | 7.48E-06      |
| AT4G31600            | 27                            | 0                              | 7.22E-09      |
| AT4G31650            | 20                            | 0                              | 9.31E-07      |
| AT4G31750            | 31                            | 0                              | 4.49E-10      |
| AT4G31820            | 103                           | 0                              | 8.71E-32      |
| AT4G32130            | 16                            | 0                              | 1.50E-05      |
| AT4G32170            | 19                            | 0                              | 1.86E-06      |
| AT4G32190            | 45                            | 2                              | 7.98E-12      |
| AT4G32490            | 13                            | 0                              | 1.20E-04      |
| AT4G32530            | 96                            | 9                              | 8.18E-20      |
| AT4G32590            | 41                            | 0                              | 4.33E-13      |
| AT4G32600            | 48                            | 1                              | 8.59E-14      |
| AT4G33460            | 12                            | 0                              | 2.41E-04      |
| AT4G33490            | 15                            | 0                              | 3.00E-05      |
| AT4G33630            | 17                            | 0                              | 7.48E-06      |
| AT4G34090            | 54                            | 0                              | 5.20E-17      |
| AT4G34180            | 58                            | 1                              | 9.91E-17      |
| AT4G34480            | 13                            | 0                              | 1.20E-04      |
| AT4G34870            | 143                           | 1                              | 5.53E-42      |
| AT4G35020            | 26                            | 0                              | 1.44E-08      |
| AT4G35335            | 23                            | 0                              | 1.16E-07      |
| AT4G35770            | 265                           | 0                              | 1.22E-80      |
| AT4G35785            | 17                            | 2                              | 3.97E-04      |
| AT4G35800            | 35                            | 1                              | 5.32E-10      |
| AT4G35840            | 37                            | 0                              | 6.96E-12      |
| AT4G36240            | 63                            | 0                              | 1.01E-19      |
| AT4G36280            | 48                            | 0                              | 3.36E-15      |
| AT4G36470            | 14                            | 0                              | 6.00E-05      |
| AT4G36940            | 60                            | 0                              | 8.07E-19      |
| AT4G37445            | 15                            | 0                              | 3.00E-05      |
| AT4G37460            | 48                            | 1                              | 8.59E-14      |
| AT4G37800            | 15                            | 0                              | 3.00E-05      |
| AT4G38090            | 34                            | 0                              | 5.59E-11      |
| AT4G38150            | 39                            | 0                              | 1.74E-12      |
| AT4G38230            | 18                            | 0                              | 3.73E-06      |
| AT4G38360            | 33                            | 0                              | 1.12E-10      |
| AT4G38380            | 13                            | 0                              | 1.20E-04      |
| AT4G38470            | 39                            | 1                              | 3.66E-11      |
| AT4G38520            | 83                            | 0                              | 9.36E-26      |



Supplementary Table 5

| Gene ID <sup>a</sup> | Raw transcriptional activity  |                                |               |
|----------------------|-------------------------------|--------------------------------|---------------|
|                      | Wild Type ovules <sup>b</sup> | <i>sp</i> /ovules <sup>b</sup> | Fisher pvalue |
| AT4G38650            | 20                            | 0                              | 9.31E-07      |
| AT4G38790            | 41                            | 0                              | 4.33E-13      |
| AT4G38800            | 55                            | 0                              | 2.60E-17      |
| AT4G39550            | 47                            | 0                              | 6.72E-15      |
| AT4G39780            | 15                            | 0                              | 3.00E-05      |
| AT4G39800            | 25                            | 0                              | 2.89E-08      |
| AT4G39865            | 15                            | 0                              | 3.00E-05      |
| AT4G39890            | 24                            | 0                              | 5.79E-08      |
| AT5G01075            | 13                            | 0                              | 1.20E-04      |
| AT5G01370            | 34                            | 0                              | 5.59E-11      |
| AT5G01650            | 25                            | 0                              | 2.89E-08      |
| AT5G01800            | 12                            | 0                              | 2.41E-04      |
| AT5G01810            | 16                            | 0                              | 1.50E-05      |
| AT5G01860            | 33                            | 0                              | 1.12E-10      |
| AT5G02180            | 26                            | 0                              | 1.44E-08      |
| AT5G02410            | 33                            | 1                              | 2.02E-09      |
| AT5G02560            | 18                            | 0                              | 3.73E-06      |
| AT5G02850            | 24                            | 0                              | 5.79E-08      |
| AT5G02950            | 80                            | 4                              | 1.01E-19      |
| AT5G03070            | 63                            | 0                              | 1.01E-19      |
| AT5G03320            | 25                            | 0                              | 2.89E-08      |
| AT5G03330            | 40                            | 1                              | 1.87E-11      |
| AT5G03520            | 53                            | 0                              | 1.04E-16      |
| AT5G04770            | 14                            | 0                              | 6.00E-05      |
| AT5G04930            | 87                            | 1                              | 2.63E-25      |
| AT5G05090            | 33                            | 0                              | 1.12E-10      |
| AT5G05100            | 103                           | 0                              | 8.71E-32      |
| AT5G05365            | 53                            | 0                              | 1.04E-16      |
| AT5G05760            | 58                            | 0                              | 3.24E-18      |
| AT5G06220            | 45                            | 1                              | 6.49E-13      |
| AT5G06310            | 37                            | 0                              | 6.96E-12      |
| AT5G06350            | 14                            | 0                              | 6.00E-05      |
| AT5G06660            | 14                            | 0                              | 6.00E-05      |
| AT5G06810            | 13                            | 0                              | 1.20E-04      |
| AT5G06870            | 50                            | 0                              | 8.37E-16      |
| AT5G07350            | 101                           | 0                              | 3.49E-31      |
| AT5G07710            | 33                            | 0                              | 1.12E-10      |
| AT5G07810            | 30                            | 0                              | 8.99E-10      |
| AT5G07910            | 76                            | 0                              | 1.21E-23      |
| AT5G07950            | 39                            | 0                              | 1.74E-12      |

Supplementary Table 5

| Gene ID <sup>a</sup> | Raw transcriptional activity  |                                | Fisher pvalue |
|----------------------|-------------------------------|--------------------------------|---------------|
|                      | Wild Type ovules <sup>b</sup> | <i>sp</i> /ovules <sup>b</sup> |               |
| AT5G07960            | 105                           | 0                              | 2.17E-32      |
| AT5G08090            | 13                            | 0                              | 1.20E-04      |
| AT5G08100            | 117                           | 3                              | 1.95E-31      |
| AT5G08120            | 29                            | 0                              | 1.80E-09      |
| AT5G08340            | 42                            | 0                              | 2.16E-13      |
| AT5G08350            | 73                            | 0                              | 9.70E-23      |
| AT5G08565            | 53                            | 0                              | 1.04E-16      |
| AT5G08710            | 21                            | 0                              | 4.65E-07      |
| AT5G08720            | 12                            | 0                              | 2.41E-04      |
| AT5G09260            | 17                            | 0                              | 7.48E-06      |
| AT5G09580            | 27                            | 0                              | 7.22E-09      |
| AT5G10290            | 12                            | 0                              | 2.41E-04      |
| AT5G10620            | 16                            | 0                              | 1.50E-05      |
| AT5G10630            | 13                            | 0                              | 1.20E-04      |
| AT5G10790            | 19                            | 0                              | 1.86E-06      |
| AT5G10910            | 23                            | 0                              | 1.16E-07      |
| AT5G11020            | 19                            | 0                              | 1.86E-06      |
| AT5G11180            | 31                            | 0                              | 4.49E-10      |
| AT5G11380            | 22                            | 0                              | 2.32E-07      |
| AT5G11490            | 24                            | 0                              | 5.79E-08      |
| AT5G11810            | 32                            | 0                              | 2.24E-10      |
| AT5G11870            | 16                            | 0                              | 1.50E-05      |
| AT5G12290            | 12                            | 0                              | 2.41E-04      |
| AT5G12380            | 76                            | 0                              | 1.21E-23      |
| AT5G12970            | 27                            | 0                              | 7.22E-09      |
| AT5G13150            | 37                            | 0                              | 6.96E-12      |
| AT5G13200            | 40                            | 0                              | 8.67E-13      |
| AT5G13440            | 34                            | 0                              | 5.59E-11      |
| AT5G13490            | 253                           | 12                             | 2.78E-60      |
| AT5G13650            | 34                            | 0                              | 5.59E-11      |
| AT5G13710            | 22                            | 0                              | 2.32E-07      |
| AT5G13770            | 31                            | 0                              | 4.49E-10      |
| AT5G13790            | 18                            | 0                              | 3.73E-06      |
| AT5G13860            | 40                            | 0                              | 8.67E-13      |
| AT5G14280            | 13                            | 0                              | 1.20E-04      |
| AT5G14500            | 21                            | 0                              | 4.65E-07      |
| AT5G14860            | 23                            | 0                              | 1.16E-07      |
| AT5G14910            | 15                            | 0                              | 3.00E-05      |
| AT5G15260            | 135                           | 4                              | 1.95E-35      |
| AT5G15760            | 34                            | 0                              | 5.59E-11      |

Supplementary Table 5

| Gene ID <sup>a</sup> | Raw transcriptional activity  |                                |               |
|----------------------|-------------------------------|--------------------------------|---------------|
|                      | Wild Type ovules <sup>b</sup> | <i>sp</i> /ovules <sup>b</sup> | Fisher pvalue |
| AT5G15770            | 30                            | 0                              | 8.99E-10      |
| AT5G15810            | 22                            | 0                              | 2.32E-07      |
| AT5G15860            | 18                            | 0                              | 3.73E-06      |
| AT5G16250            | 65                            | 0                              | 2.51E-20      |
| AT5G16260            | 12                            | 0                              | 2.41E-04      |
| AT5G16390            | 34                            | 0                              | 5.59E-11      |
| AT5G16500            | 18                            | 0                              | 3.73E-06      |
| AT5G16560            | 12                            | 0                              | 2.41E-04      |
| AT5G16660            | 48                            | 0                              | 3.36E-15      |
| AT5G16720            | 38                            | 0                              | 3.48E-12      |
| AT5G16820            | 52                            | 1                              | 5.76E-15      |
| AT5G17090            | 34                            | 1                              | 1.04E-09      |
| AT5G17210            | 175                           | 2                              | 6.78E-50      |
| AT5G17300            | 43                            | 0                              | 1.08E-13      |
| AT5G17710            | 42                            | 0                              | 2.16E-13      |
| AT5G17770            | 18                            | 0                              | 3.73E-06      |
| AT5G17790            | 34                            | 0                              | 5.59E-11      |
| AT5G18220            | 25                            | 0                              | 2.89E-08      |
| AT5G18255            | 97                            | 3                              | 1.22E-25      |
| AT5G18440            | 15                            | 0                              | 3.00E-05      |
| AT5G18480            | 31                            | 0                              | 4.49E-10      |
| AT5G18630            | 158                           | 1                              | 1.83E-46      |
| AT5G18810            | 17                            | 0                              | 7.48E-06      |
| AT5G18840            | 17                            | 1                              | 7.50E-05      |
| AT5G19151            | 137                           | 3                              | 2.87E-37      |
| AT5G19210            | 18                            | 0                              | 3.73E-06      |
| AT5G19670            | 20                            | 0                              | 9.31E-07      |
| AT5G19790            | 35                            | 0                              | 2.79E-11      |
| AT5G19810            | 47                            | 0                              | 6.72E-15      |
| AT5G19910            | 15                            | 2                              | 1.30E-03      |
| AT5G20150            | 16                            | 0                              | 1.50E-05      |
| AT5G20250            | 943                           | 21                             | 1.67E-248     |
| AT5G20500            | 57                            | 0                              | 6.48E-18      |
| AT5G20510            | 31                            | 0                              | 4.49E-10      |
| AT5G20660            | 30                            | 0                              | 8.99E-10      |
| AT5G20830            | 89                            | 2                              | 1.56E-24      |
| AT5G21080            | 48                            | 0                              | 3.36E-15      |
| AT5G21140            | 35                            | 2                              | 5.21E-09      |
| AT5G21160            | 104                           | 4                              | 1.59E-26      |
| AT5G21900            | 45                            | 0                              | 2.69E-14      |

Supplementary Table 5

| Gene ID <sup>a</sup> | Raw transcriptional activity  |                                | Fisher pvalue |
|----------------------|-------------------------------|--------------------------------|---------------|
|                      | Wild Type ovules <sup>b</sup> | <i>sp</i> /ovules <sup>b</sup> |               |
| AT5G22060            | 104                           | 0                              | 4.35E-32      |
| AT5G22400            | 19                            | 0                              | 1.86E-06      |
| AT5G22450            | 68                            | 4                              | 2.28E-16      |
| AT5G22460            | 151                           | 0                              | 2.92E-46      |
| AT5G22830            | 27                            | 0                              | 7.22E-09      |
| AT5G22875            | 23                            | 0                              | 1.16E-07      |
| AT5G23090            | 42                            | 0                              | 2.16E-13      |
| AT5G23380            | 33                            | 0                              | 1.12E-10      |
| AT5G23395            | 177                           | 0                              | 4.21E-54      |
| AT5G23850            | 37                            | 0                              | 6.96E-12      |
| AT5G23870            | 51                            | 1                              | 1.13E-14      |
| AT5G24400            | 65                            | 0                              | 2.51E-20      |
| AT5G24735            | 64                            | 0                              | 5.02E-20      |
| AT5G25060            | 18                            | 0                              | 3.73E-06      |
| AT5G25080            | 41                            | 0                              | 4.33E-13      |
| AT5G25090            | 183                           | 5                              | 4.08E-48      |
| AT5G25100            | 107                           | 2                              | 8.33E-30      |
| AT5G25780            | 39                            | 0                              | 1.74E-12      |
| AT5G25920            | 19                            | 0                              | 1.86E-06      |
| AT5G26200            | 17                            | 0                              | 7.48E-06      |
| AT5G26210            | 53                            | 0                              | 1.04E-16      |
| AT5G26820            | 64                            | 0                              | 5.02E-20      |
| AT5G26910            | 21                            | 0                              | 4.65E-07      |
| AT5G27380            | 13                            | 0                              | 1.20E-04      |
| AT5G27400            | 72                            | 1                              | 7.31E-21      |
| AT5G27440            | 18                            | 0                              | 3.73E-06      |
| AT5G27730            | 14                            | 0                              | 6.00E-05      |
| AT5G27750            | 77                            | 15                             | 1.85E-11      |
| AT5G27830            | 19                            | 0                              | 1.86E-06      |
| AT5G27970            | 38                            | 0                              | 3.48E-12      |
| AT5G28000            | 56                            | 0                              | 1.30E-17      |
| AT5G28020            | 54                            | 0                              | 5.20E-17      |
| AT5G28626            | 15                            | 0                              | 3.00E-05      |
| AT5G28840            | 14                            | 0                              | 6.00E-05      |
| AT5G33340            | 30                            | 0                              | 8.99E-10      |
| AT5G35680            | 22                            | 0                              | 2.32E-07      |
| AT5G36170            | 18                            | 0                              | 3.73E-06      |
| AT5G37130            | 20                            | 0                              | 9.31E-07      |
| AT5G37190            | 17                            | 0                              | 7.48E-06      |
| AT5G37380            | 19                            | 0                              | 1.86E-06      |

Supplementary Table 5

| Gene ID <sup>a</sup> | Raw transcriptional activity  |                                |               |
|----------------------|-------------------------------|--------------------------------|---------------|
|                      | Wild Type ovules <sup>b</sup> | <i>sp</i> /ovules <sup>b</sup> | Fisher pvalue |
| AT5G37540            | 13                            | 0                              | 1.20E-04      |
| AT5G37710            | 21                            | 3                              | 1.54E-04      |
| AT5G37890            | 82                            | 1                              | 8.00E-24      |
| AT5G38460            | 26                            | 0                              | 1.44E-08      |
| AT5G38850            | 28                            | 0                              | 3.60E-09      |
| AT5G38860            | 17                            | 0                              | 7.48E-06      |
| AT5G38970            | 54                            | 0                              | 5.20E-17      |
| AT5G39840            | 13                            | 0                              | 1.20E-04      |
| AT5G40150            | 20                            | 0                              | 9.31E-07      |
| AT5G40200            | 50                            | 0                              | 8.37E-16      |
| AT5G40380            | 18                            | 0                              | 3.73E-06      |
| AT5G40760            | 98                            | 0                              | 2.81E-30      |
| AT5G41020            | 12                            | 0                              | 2.41E-04      |
| AT5G41600            | 12                            | 0                              | 2.41E-04      |
| AT5G41980            | 50                            | 0                              | 8.37E-16      |
| AT5G42030            | 66                            | 0                              | 1.25E-20      |
| AT5G42060            | 61                            | 0                              | 4.03E-19      |
| AT5G42242            | 12                            | 0                              | 2.41E-04      |
| AT5G43280            | 73                            | 0                              | 9.70E-23      |
| AT5G43430            | 49                            | 0                              | 1.68E-15      |
| AT5G43513            | 196                           | 4                              | 3.36E-53      |
| AT5G44040            | 17                            | 0                              | 7.48E-06      |
| AT5G44495            | 19                            | 0                              | 1.86E-06      |
| AT5G44500            | 13                            | 0                              | 1.20E-04      |
| AT5G44760            | 33                            | 0                              | 1.12E-10      |
| AT5G44860            | 23                            | 0                              | 1.16E-07      |
| AT5G44980            | 17                            | 0                              | 7.48E-06      |
| AT5G45050            | 20                            | 0                              | 9.31E-07      |
| AT5G45110            | 13                            | 0                              | 1.20E-04      |
| AT5G45170            | 24                            | 0                              | 5.79E-08      |
| AT5G45260            | 26                            | 0                              | 1.44E-08      |
| AT5G45590            | 25                            | 0                              | 2.89E-08      |
| AT5G45750            | 12                            | 0                              | 2.41E-04      |
| AT5G45775            | 181                           | 6                              | 2.45E-46      |
| AT5G45790            | 19                            | 0                              | 1.86E-06      |
| AT5G46590            | 19                            | 0                              | 1.86E-06      |
| AT5G46700            | 12                            | 0                              | 2.41E-04      |
| AT5G46730            | 23                            | 0                              | 1.16E-07      |
| AT5G46790            | 21                            | 0                              | 4.65E-07      |
| AT5G46960            | 51                            | 0                              | 4.18E-16      |

Supplementary Table 5

| Gene ID <sup>a</sup> | Raw transcriptional activity  |                                | Fisher pvalue |
|----------------------|-------------------------------|--------------------------------|---------------|
|                      | Wild Type ovules <sup>b</sup> | <i>sp</i> /ovules <sup>b</sup> |               |
| AT5G47110            | 18                            | 0                              | 3.73E-06      |
| AT5G47240            | 92                            | 0                              | 1.81E-28      |
| AT5G47250            | 14                            | 0                              | 6.00E-05      |
| AT5G47370            | 25                            | 0                              | 2.89E-08      |
| AT5G47520            | 24                            | 0                              | 5.79E-08      |
| AT5G47700            | 215                           | 0                              | 1.46E-65      |
| AT5G47810            | 17                            | 0                              | 7.48E-06      |
| AT5G48090            | 26                            | 0                              | 1.44E-08      |
| AT5G48290            | 12                            | 0                              | 2.41E-04      |
| AT5G48520            | 36                            | 0                              | 1.39E-11      |
| AT5G48530            | 59                            | 0                              | 1.62E-18      |
| AT5G48840            | 27                            | 0                              | 7.22E-09      |
| AT5G49010            | 62                            | 2                              | 1.09E-16      |
| AT5G49015            | 19                            | 0                              | 1.86E-06      |
| AT5G49215            | 29                            | 0                              | 1.80E-09      |
| AT5G49220            | 18                            | 0                              | 3.73E-06      |
| AT5G49400            | 47                            | 0                              | 6.72E-15      |
| AT5G49640            | 63                            | 2                              | 5.60E-17      |
| AT5G49880            | 14                            | 0                              | 6.00E-05      |
| AT5G50340            | 13                            | 0                              | 1.20E-04      |
| AT5G50430            | 46                            | 2                              | 4.15E-12      |
| AT5G50930            | 34                            | 0                              | 5.59E-11      |
| AT5G50970            | 18                            | 0                              | 3.73E-06      |
| AT5G51020            | 54                            | 0                              | 5.20E-17      |
| AT5G51451            | 23                            | 0                              | 1.16E-07      |
| AT5G51700            | 37                            | 0                              | 6.96E-12      |
| AT5G51890            | 40                            | 0                              | 8.67E-13      |
| AT5G52030            | 15                            | 0                              | 3.00E-05      |
| AT5G52810            | 42                            | 0                              | 2.16E-13      |
| AT5G52860            | 44                            | 0                              | 5.39E-14      |
| AT5G53060            | 57                            | 0                              | 6.48E-18      |
| AT5G53080            | 18                            | 0                              | 3.73E-06      |
| AT5G53280            | 89                            | 1                              | 6.70E-26      |
| AT5G53440            | 23                            | 0                              | 1.16E-07      |
| AT5G53470            | 23                            | 0                              | 1.16E-07      |
| AT5G53650            | 33                            | 0                              | 1.12E-10      |
| AT5G53940            | 43                            | 2                              | 2.94E-11      |
| AT5G54160            | 79                            | 0                              | 1.50E-24      |
| AT5G54500            | 18                            | 0                              | 3.73E-06      |
| AT5G54760            | 20                            | 0                              | 9.31E-07      |

Supplementary Table 5

| Gene ID <sup>a</sup> | Raw transcriptional activity  |                                | Fisher pvalue |
|----------------------|-------------------------------|--------------------------------|---------------|
|                      | Wild Type ovules <sup>b</sup> | <i>sp</i> /ovules <sup>b</sup> |               |
| AT5G54870            | 49                            | 0                              | 1.68E-15      |
| AT5G55000            | 110                           | 0                              | 6.75E-34      |
| AT5G55120            | 172                           | 5                              | 6.26E-45      |
| AT5G55160            | 45                            | 0                              | 2.69E-14      |
| AT5G55210            | 66                            | 0                              | 1.25E-20      |
| AT5G55700            | 27                            | 0                              | 7.22E-09      |
| AT5G55930            | 34                            | 1                              | 1.04E-09      |
| AT5G55940            | 15                            | 0                              | 3.00E-05      |
| AT5G55990            | 12                            | 0                              | 2.41E-04      |
| AT5G56020            | 49                            | 1                              | 4.37E-14      |
| AT5G56120            | 19                            | 2                              | 1.19E-04      |
| AT5G56130            | 18                            | 0                              | 3.73E-06      |
| AT5G56350            | 30                            | 0                              | 8.99E-10      |
| AT5G56550            | 22                            | 0                              | 2.32E-07      |
| AT5G56580            | 188                           | 67                             | 1.15E-14      |
| AT5G56890            | 21                            | 0                              | 4.65E-07      |
| AT5G57070            | 16                            | 0                              | 1.50E-05      |
| AT5G57160            | 18                            | 0                              | 3.73E-06      |
| AT5G57280            | 41                            | 0                              | 4.33E-13      |
| AT5G57290            | 60                            | 0                              | 8.07E-19      |
| AT5G57410            | 42                            | 1                              | 4.88E-12      |
| AT5G57590            | 41                            | 0                              | 4.33E-13      |
| AT5G57940            | 14                            | 0                              | 6.00E-05      |
| AT5G57960            | 37                            | 0                              | 6.96E-12      |
| AT5G58640            | 28                            | 0                              | 3.60E-09      |
| AT5G58750            | 56                            | 0                              | 1.30E-17      |
| AT5G58920            | 51                            | 0                              | 4.18E-16      |
| AT5G59030            | 42                            | 0                              | 2.16E-13      |
| AT5G59290            | 48                            | 0                              | 3.36E-15      |
| AT5G59440            | 30                            | 0                              | 8.99E-10      |
| AT5G59470            | 33                            | 0                              | 1.12E-10      |
| AT5G59550            | 91                            | 0                              | 3.62E-28      |
| AT5G59810            | 62                            | 0                              | 2.01E-19      |
| AT5G59960            | 48                            | 0                              | 3.36E-15      |
| AT5G60170            | 116                           | 4                              | 5.84E-30      |
| AT5G60200            | 38                            | 0                              | 3.48E-12      |
| AT5G60340            | 35                            | 0                              | 2.79E-11      |
| AT5G60460            | 18                            | 0                              | 3.73E-06      |
| AT5G60553            | 26                            | 0                              | 1.44E-08      |
| AT5G60600            | 33                            | 0                              | 1.12E-10      |

Supplementary Table 5

| Gene ID <sup>a</sup> | Raw transcriptional activity  |                                |               |
|----------------------|-------------------------------|--------------------------------|---------------|
|                      | Wild Type ovules <sup>b</sup> | <i>sp</i> /ovules <sup>b</sup> | Fisher pvalue |
| AT5G60630            | 54                            | 1                              | 1.49E-15      |
| AT5G60640            | 80                            | 0                              | 7.52E-25      |
| AT5G60690            | 24                            | 0                              | 5.79E-08      |
| AT5G60880            | 45                            | 0                              | 2.69E-14      |
| At5g60963            | 15                            | 0                              | 3.00E-05      |
| AT5G61530            | 17                            | 0                              | 7.48E-06      |
| AT5G61800            | 20                            | 0                              | 9.31E-07      |
| AT5G61820            | 18                            | 0                              | 3.73E-06      |
| AT5G61840            | 89                            | 0                              | 1.45E-27      |
| AT5G61920            | 50                            | 1                              | 2.23E-14      |
| AT5G61930            | 70                            | 0                              | 7.79E-22      |
| AT5G61990            | 19                            | 0                              | 1.86E-06      |
| AT5G62000            | 48                            | 1                              | 8.59E-14      |
| AT5G62080            | 16                            | 0                              | 1.50E-05      |
| AT5G62170            | 39                            | 2                              | 3.95E-10      |
| AT5G62200            | 41                            | 0                              | 4.33E-13      |
| AT5G62280            | 55                            | 0                              | 2.60E-17      |
| AT5G62550            | 15                            | 0                              | 3.00E-05      |
| AT5G62610            | 249                           | 4                              | 8.92E-69      |
| AT5G62710            | 22                            | 0                              | 2.32E-07      |
| AT5G62910            | 76                            | 4                              | 1.34E-18      |
| AT5G62920            | 17                            | 0                              | 7.48E-06      |
| AT5G62940            | 105                           | 0                              | 2.17E-32      |
| AT5G62980            | 114                           | 0                              | 4.20E-35      |
| AT5G63060            | 21                            | 0                              | 4.65E-07      |
| AT5G63063            | 15                            | 0                              | 3.00E-05      |
| AT5G63087            | 34                            | 0                              | 5.59E-11      |
| AT5G63180            | 32                            | 0                              | 2.24E-10      |
| AT5G63300            | 16                            | 0                              | 1.50E-05      |
| AT5G63490            | 49                            | 0                              | 1.68E-15      |
| AT5G63500            | 60                            | 0                              | 8.07E-19      |
| AT5G63760            | 123                           | 2                              | 1.63E-34      |
| AT5G63800            | 12                            | 0                              | 2.41E-04      |
| AT5G63870            | 26                            | 0                              | 1.44E-08      |
| AT5G63920            | 68                            | 0                              | 3.12E-21      |
| AT5G64050            | 51                            | 0                              | 4.18E-16      |
| AT5G64150            | 40                            | 0                              | 8.67E-13      |
| AT5G64250            | 83                            | 0                              | 9.36E-26      |
| AT5G64280            | 17                            | 0                              | 7.48E-06      |
| AT5G64440            | 55                            | 1                              | 7.56E-16      |



Supplementary Table 5

| Gene ID <sup>a</sup> | Raw transcriptional activity  |                                | Fisher pvalue |
|----------------------|-------------------------------|--------------------------------|---------------|
|                      | Wild Type ovules <sup>b</sup> | <i>sp/</i> ovules <sup>b</sup> |               |
| AT5G64572            | 58                            | 0                              | 3.24E-18      |
| AT5G64650            | 23                            | 0                              | 1.16E-07      |
| AT5G65080            | 28                            | 0                              | 3.60E-09      |
| AT5G65180            | 23                            | 0                              | 1.16E-07      |
| AT5G65470            | 16                            | 0                              | 1.50E-05      |
| AT5G65520            | 124                           | 0                              | 4.05E-38      |
| AT5G65540            | 65                            | 0                              | 2.51E-20      |
| AT5G65650            | 34                            | 0                              | 5.59E-11      |
| AT5G65685            | 54                            | 0                              | 5.20E-17      |
| AT5G65690            | 22                            | 0                              | 2.32E-07      |
| AT5G65730            | 12                            | 0                              | 2.41E-04      |
| AT5G65850            | 24                            | 0                              | 5.79E-08      |
| AT5G65900            | 35                            | 0                              | 2.79E-11      |
| AT5G66000            | 12                            | 0                              | 2.41E-04      |
| AT5G66130            | 14                            | 0                              | 6.00E-05      |
| AT5G66500            | 18                            | 0                              | 3.73E-06      |
| AT5G66770            | 79                            | 0                              | 1.50E-24      |
| AT5G66810            | 15                            | 0                              | 3.00E-05      |
| AT5G67130            | 53                            | 0                              | 1.04E-16      |
| AT5G67460            | 196                           | 75                             | 7.86E-14      |
| AT5G67580            | 25                            | 0                              | 2.89E-08      |
| ATCG00030            | 68                            | 1                              | 1.11E-19      |
| ATCG00160            | 19                            | 0                              | 1.86E-06      |

<sup>a</sup> TheArabidopsis Genome Initiative Number

<sup>b</sup>Raw Transcriptional activity (Total signatures per gene).

<sup>c</sup> Fisher exact test p-Value.

Supplementary Table 6

Supplementary table 6. Insertional lines screened looking for female gametophytic defects.

| GENE ID   | STOCK        |
|-----------|--------------|
| At1g01060 | SALK_149287  |
| At1g02060 | SAIL_423_B07 |
| At1g03250 | SALK_017923  |
| At1g05540 | SALK_023237  |
| At1g05750 | SALK_104250  |
| At1g05805 | SALK_106364  |
| At1g06250 | SALK_083919  |
| At1g07020 | SALK_066870  |
| At1g08680 | SALK_116821  |
| At1g08970 | SALK_058903  |
| At1g09710 | SALK_106866  |
| At1g10590 | SALK_010814  |
| At1g12080 | SALK_138122  |
| At1g12120 | SALK_083872  |
| At1g12400 | SAIL_364_A08 |
| At1g12610 | SALK_114390  |
| At1g13210 | SALK_121697  |
| At1g14200 | SALK_095353  |
| At1g14260 | SALK_118406  |
| At1g15220 | SALK_046392  |
| At1g15690 | SALK_046492  |
| At1g15780 | SALK_059783  |
| At1g17120 | SALK_133128  |
| At1g17400 | SALK_119273  |
| At1g18610 | SALK_003526  |
| At1g19790 | SALK_151552  |
| At1g19990 | SALK_065338  |
| At1g20140 | SALK_114528  |
| At1g21390 | SALK_061442  |
| At1g21400 | SALK_071180  |
| At1g22275 | SALK_045440  |
| At1g22970 | SALK_120579  |
| At1g23550 | SAIL_361_A07 |
| At1g23790 | SALK_050121  |
| At1g23960 | SALK_111586  |
| At1g24120 | SALK_059216  |
| At1g26480 | SALK_110798  |

STOCK

Supplementary Table 6

| GENE ID   |              |
|-----------|--------------|
| At1g26620 | SALK_035172  |
| At1g28440 | SALK_108127  |
| At1g29060 | SALK_141347  |
| At1g29260 | SALK_005354  |
| At1g30970 | SALK_056285  |
| At1g32300 | SALK_060116  |
| At1g32310 | SALK_018488  |
| At1g34210 | SALK_003614  |
| At1g43886 | SALK_020396  |
| At1g44900 | SALK_054614  |
| At1g45000 | SALK_101982  |
| At1g47450 | SALK_124353  |
| At1g47470 | SALK_114435  |
| At1g47670 | CS859439     |
| At1g47780 | SALK_102031  |
| At1g48240 | SALK_092845  |
| At1g48460 | SALK_014132  |
| At1g49410 | SALK_110615  |
| At1g49920 | SALK_024493  |
| At1g50250 | SALK_133555  |
| At1g51100 | SAIL_697_B12 |
| At1g51440 | SALK_012430  |
| At1g51960 | SALK_106850  |
| At1g52220 | SALK_052057  |
| At1g53300 | SALK_081417  |
| At1g53440 | SALK_130548  |
| At1g55260 | SALK_067741  |
| At1g55680 | SALK_142665c |
| At1g55810 | SALK_118929  |
| At1g56180 | SALK_053826  |
| At1g60560 | SALK_023519  |
| At1g60970 | SALK_067179  |
| At1g62520 | SALK_117636  |
| At1g62680 | SALK_139736  |
| At1g62860 | SALK_043644  |
| At1g63220 | SALK_120441  |
| At1g63490 | SALK_089978  |
| At1g64520 | SALK_134934  |
| At1g65240 | SAIL_161_A07 |
| At1g67570 | SALK_060234  |

Supplementary Table 6

| GENE ID   | STOCK        |
|-----------|--------------|
| At1g67750 | SALK_095735  |
| At1g69400 | SALK_053743  |
| At1g70250 | SAIL_125_D06 |
| At1g70500 | SALK_117236  |
| At1g70560 | SALK_022743  |
| At1g71310 | SALK_089362  |
| At1g71865 | SALK_032816  |
| At1g72880 | SALK_061696  |
| At1g74180 | SAIL_904_H11 |
| At1g74390 | SALK_086424  |
| At1g75020 | SALK_115626  |
| At1g75260 | SALK_113793  |
| At1g75430 | SALK_030336  |
| At1g75980 | SALK_023922  |
| At1g76130 | SALK_008656  |
| At1g76830 | SALK_021998  |
| At1g78400 | SALK_071023  |
| At1g78560 | SALK_008931  |
| At1g79410 | SALK_045609  |
| At1g79810 | SALK_062976  |
| At2g01400 | SALK_124838  |
| At2g02740 | SALK_005345  |
| At2g02910 | SALK_098750  |
| At2g03260 | SALK_056388  |
| At2g03550 | SALK_009690  |
| At2g03810 | SALK_042890  |
| At2g03840 | SALK_011012  |
| At2g04235 | SALK_091108  |
| At2g06090 | SAIL_652_G04 |
| At2g07340 | SALK_013585  |
| At2g09800 | SALK_059493  |
| At2g10340 | SALK_056999  |
| At2g11140 | SALK_131580  |
| At2g13610 | SALK_126034  |
| At2g14170 | SALK_093983  |
| At2g15695 | SALK_044186  |
| At2g16370 | SALK_054193  |
| At2g18330 | SALK_140302  |
| At2g18700 | SALK_082979  |
| At2g20515 | SALK_094958  |

Supplementary Table 6

| GENE ID   | STOCK        |
|-----------|--------------|
| At2g20800 | SAIL_543_F10 |
| At2g21580 | SALK_001420  |
| At2g22940 | SALK_058177  |
| At2g23530 | SALK_086420  |
| At2g24270 | SALK_147202  |
| At2g25300 | SALK_044399  |
| At2g25650 | SALK_032610  |
| At2g27900 | SALK_113195  |
| At2g28110 | SALK_120296  |
| At2g28480 | SALK_021339  |
| At2g28680 | SALK_077956  |
| At2g28800 | SALK_044418  |
| At2g29660 | SALK_119814  |
| At2g29700 | SALK_035930  |
| At2g29970 | SALK_122196  |
| At2g30700 | SALK_024519  |
| At2g32720 | SALK_041099  |
| At2g33400 | SALK_60675   |
| At2g34420 | SALK_049351  |
| At2g34690 | SAIL_915_B04 |
| At2g35250 | SALK_121861  |
| At2g35330 | CS24712      |
| At2g35550 | SALK_018618  |
| At2g36835 | SALK_065861  |
| At2g37050 | SALK_070810  |
| At2g37120 | SALK_123257  |
| At2g37470 | SALK_003306  |
| At2g37550 | SALK_127233  |
| At2g37740 | SALK_086072  |
| At2g38140 | SALK_129668  |
| At2g38630 | SAIL_792_C08 |
| At2g38680 | SALK_078575  |
| At2g39270 | SALK_117901  |
| At2g39390 | SALK_068525  |
| At2g39930 | SALK_006623  |
| At2g40095 | SALK_113359  |
| At2g40765 | SALK_018191  |
| At2g40950 | SALK_104326  |
| At2g42005 | SALK_063680  |
| At2g42070 | SAIL_539_H02 |

Supplementary Table 6

| GENE ID   | STOCK        |
|-----------|--------------|
| At2g42280 | SALK_024023  |
| At2g42570 | SALK_117521  |
| At2g42590 | SALK_129360  |
| At2g42630 | SALK_126902  |
| At2g42650 | SALK_019141  |
| At2g42740 | SALK_120345  |
| At2g43230 | SALK_033102  |
| At2g43250 | SALK_144233  |
| At2g43330 | SALK_018591  |
| At2g43420 | SALK_129508  |
| At2g45720 | SALK_041473  |
| At2g45870 | SALK_006759  |
| At2g46200 | SALK_099276  |
| At2g46220 | SALK_091794  |
| At2g46830 | SALK_067039  |
| At2g46950 | SALK_124250  |
| At2g47010 | SALK_045432  |
| At2g47400 | SALK_008459  |
| At2g47420 | SALK_133845  |
| At2g47450 | SAIL_783_F08 |
| At3g01230 | SALK_054861  |
| At3g01330 | SALK_063981  |
| At3g01740 | SALK_015764  |
| At3g02130 | SALK_062412  |
| At3g02560 | SALK_008899  |
| At3g02960 | SALK_071540  |
| At3g03440 | SALK_014623  |
| At3g03630 | SALK_034133  |
| At3g04040 | SALK_093343  |
| At3g04640 | SALK_026582  |
| At3g04780 | SALK_086281  |
| At3g05460 | SALK_009445  |
| At3g05685 | SALK_036718  |
| At3g05720 | SALK_020428  |
| At3g05770 | SALK_069840  |
| At3g06420 | SALK_026217  |
| At3g06660 | SALK_084123  |
| At3g07480 | SALK_015333c |
| At3g08550 | SALK_087345  |
| At3g08955 | SAIL_737_F07 |

Supplementary Table 6

| GENE ID   | STOCK        |
|-----------|--------------|
| At3g09070 | SALK_139301  |
| At3g09770 | CS24715      |
| At3g09900 | SALK_076104  |
| At3g11590 | SALK_083658  |
| At3g11600 | SALK_93234   |
| At3g12930 | SALK_121803  |
| At3g13120 | SALK_145158  |
| At3g13360 | SAIL_106_E08 |
| At3g15450 | SALK_017321  |
| At3g15630 | SALK_077838  |
| At3g16020 | SALK_067113  |
| At3g16130 | SALK_032681  |
| At3g16200 | SALK_015388  |
| At3g16730 | SALK_059304  |
| At3g16770 | SALK_030459  |
| At3g17030 | SALK_042356  |
| At3g17160 | SALK_119732  |
| At3g17450 | SALK_052525  |
| At3g18480 | SALK_052760  |
| At3g20170 | SALK_042301  |
| At3g20540 | SALK_134274  |
| At3g20720 | SALK_128547  |
| At3g22760 | SALK_045808  |
| At3g23080 | SALK_062475  |
| At3g24230 | SALK_030175  |
| At3g24510 | SALK_094671  |
| At3g24927 | SALK_078437  |
| At3g26340 | SALK_081100  |
| At3g28450 | SALK_111477  |
| At3g28560 | SAIL_805_E02 |
| At3g29160 | SALK_114798  |
| At3g47450 | SALK_071384  |
| At3g47730 | SALK_090081  |
| At3g48530 | SALK_074554  |
| At3g48860 | SALK_138077  |
| At3g48950 | SALK_011242  |
| At3g49420 | SALK_128874  |
| At3g49720 | SAIL_505_E11 |
| At3g51980 | SALK_032235  |
| At3g52070 | SALK_021882  |

Supplementary Table 6

| GENE ID   | STOCK         |
|-----------|---------------|
| At3g53420 | SALK_088839   |
| At3g54420 | SALK_091602   |
| At3g55060 | SAIL_693_H10  |
| At3g57420 | SALK_045404   |
| At3g58010 | SALK_024284   |
| At3g59260 | SAIL_1243_E02 |
| At3g59430 | SALK_086046   |
| At3g59660 | SALK_072823   |
| At3g59960 | SALK_131038   |
| At3g60140 | SALK_029737   |
| At3g60500 | SALK_031994   |
| At3g60520 | SALK_126470   |
| At3g60965 | SALK_028867   |
| At3g61300 | SALK_012154   |
| At3g61710 | SALK_109281   |
| At3g61860 | SALK_085956   |
| At3g62420 | SALK_004675   |
| At4g00270 | SALK_013473   |
| At4g00450 | SALK_108241   |
| At4g00905 | SALK_069026   |
| At4g01180 | SALK_037188   |
| At4g01897 | SALK_095650   |
| At4g02040 | SALK_021719   |
| At4g02250 | SALK_139236   |
| At4g04610 | SAIL_326_H07  |
| At4g04870 | SALK_139314   |
| At4g05020 | SALK_064041   |
| At4g10650 | SALK_121198   |
| At4g11060 | SAIL_378_E03  |
| At4g11090 | SALK_022579   |
| At4g11760 | SALK_003342   |
| At4g11800 | SALK_044295   |
| At4g11820 | SALK_078721   |
| At4g12650 | SALK_023139   |
| At4g13230 | SALK_077261   |
| At4g13690 | SALK_024568   |
| At4g13780 | SALK_135441   |
| At4g14500 | SALK_018403   |
| At4g14570 | SALK_080653   |
| At4g14950 | SALK_069718   |



Supplementary Table 6

| GENE ID   | STOCK         |
|-----------|---------------|
| At4g15750 | SALK_038767   |
| At4g15950 | SALK_020157   |
| At4g16155 | SALK_083571   |
| At4g16480 | SALK_082659   |
| At4g16640 | SAIL_586_G10  |
| At4g18375 | SALK_016188   |
| At4g19490 | SALK_036485   |
| At4g20150 | SALK_088793   |
| At4g21150 | SALK_017994   |
| At4g21630 | SALK_127987   |
| At4g21710 | SALK_078769   |
| At4g21730 | SALK_108222   |
| At4g22390 | SALK_101810   |
| At4g23520 | SALK_09710    |
| At4g23960 | SALK_024220   |
| At4g24610 | SALK_113528   |
| At4g25570 | SALK_058385   |
| At4g25630 | SALK_114637   |
| At4g25700 | SALK_094002   |
| At4g26550 | SALK_143326   |
| At4g27020 | SALK_000824   |
| At4g27090 | SALK_048998   |
| At4g27280 | SALK_048098   |
| At4g28020 | SALK_096057   |
| At4g28610 | SALK_067629   |
| At4g29340 | SAIL_682_E05  |
| At4g30430 | SALK_142164   |
| At4g30600 | SALK_034609   |
| At4g31250 | SALK_105100   |
| At4g31600 | SALK_120828   |
| At4g32530 | SAIL_1155_B10 |
| At4g32600 | SALK_069389   |
| At4g34090 | SALK_068115   |
| At4g34180 | SALK_096799   |
| At4g35020 | SALK_091737   |
| At4g35800 | SALK_088125   |
| At4g35840 | CS24978       |
| At4g36240 | SALK_018414   |
| At4g36280 | SALK_062270   |
| At4g38090 | SALK_029673   |

Supplementary Table 6

| GENE ID   | STOCK        |
|-----------|--------------|
| At4g38150 | SALK_098509  |
| At4g38380 | SALK_019192  |
| At4g38520 | SALK_049798  |
| At5g01370 | SALK_003831  |
| At5g01860 | SALK_122390  |
| At5g02180 | SALK_071622  |
| At5g02410 | SALK_051207  |
| At5g03070 | SALK_005888  |
| At5g03455 | SALK_005882  |
| At5g03520 | SALK_062100  |
| At5g04460 | SALK_117733  |
| At5g04930 | SALK_002106  |
| At5g05090 | SALK_118637  |
| At5g05100 | SALK_051913  |
| At5g05760 | SALK_057421  |
| At5g06220 | SALK_012033  |
| At5g06500 | SALK_075694  |
| At5g06620 | SALK_065711  |
| At5g06870 | SALK_023011  |
| At5g07810 | SALK_137595  |
| At5g07890 | SALK_127886  |
| At5g07910 | SALK_070294  |
| At5g07950 | SALK_006685  |
| At5g08340 | SALK_076455  |
| At5g08565 | SAIL_838_D04 |
| At5g08590 | SALK_024421  |
| At5g09230 | SALK:149295  |
| At5g09580 | SALK_147007  |
| At5g12380 | SALK_062276  |
| At5g13200 | SALK_013073  |
| At5g13440 | SALK_096795  |
| At5g13490 | SALK_046870  |
| At5g15320 | SALK_116411  |
| At5g15750 | SALK_122900  |
| At5g15760 | SALK_139455  |
| At5g16250 | SALK_031814  |
| At5g16390 | SALK_120571  |
| At5g16500 | SALK_055909  |
| At5g16720 | SALK_024827  |
| At5g17090 | SALK_068375  |

Supplementary Table 6

| GENE ID   | STOCK        |
|-----------|--------------|
| At5g17210 | SALK_058503  |
| At5g17300 | SALK_025754  |
| At5g17790 | SALK_000790  |
| At5g18630 | SALK_125679  |
| At5g19650 | SALK_136444  |
| At5g19790 | SALK_101209  |
| At5g20050 | SALK_000490  |
| At5g20720 | SALK_083054  |
| At5g21080 | SALK_148611  |
| At5g21140 | SALK_015925  |
| At5g21900 | SALK_025534  |
| At5g22060 | SALK_000821  |
| At5g23395 | SALK_026945  |
| At5g23580 | SALK_090011  |
| At5g23850 | SALK_145225  |
| At5g25100 | SALK_052385  |
| At5g25780 | SALK_009083  |
| At5g25920 | SALK_089179  |
| At5g27400 | SALK_019618  |
| At5g27970 | SALK_003367  |
| At5g28000 | SALK_006136  |
| At5g33340 | SALK_050514  |
| At5g35935 | SALK_021335  |
| At5g37381 | SALK_071806  |
| At5g38970 | SALK_148384  |
| At5g39590 | SALK_082749  |
| At5g41980 | SALK_146017  |
| At5g42030 | SAIL_623_E12 |
| At5g43280 | SALK_002674  |
| At5g44760 | SALK_104320  |
| At5g44790 | SALK_006331  |
| At5g44980 | SALK_077681  |
| At5g45150 | SALK_005745  |
| At5g45260 | SALK_065748  |
| At5g45775 | SALK_123502  |
| At5g45790 | SALK_095684  |
| At5g46590 | SALK_078797  |
| At5g47240 | SALK_046577  |
| At5g47250 | SALK_098936  |
| At5g47700 | SALK_059356  |

Supplementary Table 6

| GENE ID   | STOCK        |
|-----------|--------------|
| At5g48090 | SALK_112608  |
| At5g48140 | SALK_065870  |
| At5g48520 | SALK_045375  |
| At5g49215 | SALK_056269  |
| At5g49640 | SALK_058837  |
| At5g51020 | SALK_088835  |
| At5g51630 | SALK_124803  |
| At5g52860 | SALK_148022  |
| At5g53280 | SALK_117722  |
| At5g54160 | CS25167      |
| At5g54780 | SALK_141450  |
| At5g55210 | SALK_060883  |
| At5g55990 | SALK_15142   |
| At5g56020 | SALK_142246  |
| At5g56880 | SAIL_105_H08 |
| At5g57160 | SALK_044027  |
| At5g57280 | SALK_071938  |
| At5g57290 | SALK_120009  |
| At5g57410 | SALK_074089  |
| At5g57590 | SALK_059607  |
| At5g58510 | SALK_100935  |
| At5g58920 | SALK_068750  |
| At5g59030 | SALK_067183  |
| At5g59810 | SALK_025087  |
| At5g59960 | SALK_041674  |
| At5g60200 | SALK_022367  |
| At5g60630 | SALK_116512  |
| At5g60640 | SALK_073313  |
| At5g60880 | SALK_070834  |
| At5g60963 | SALK_148180  |
| At5g61930 | SALK_088641  |
| At5g62170 | SALK_047222  |
| At5g62200 | SALK_022266  |
| At5g62940 | SALK_008810  |
| At5g62980 | SALK_147446  |
| At5g63490 | SALK_129317  |
| At5g63500 | SALK_113863  |
| At5g64050 | SALK_073242  |
| At5g64370 | SALK_016594  |
| At5g64440 | SALK_118043  |

Supplementary Table 6

| GENE ID   | STOCK        |
|-----------|--------------|
| At5g65520 | SALK_138023  |
| At5g65540 | SALK_107533  |
| At5g65650 | SALK_074259  |
| At5g65700 | SALK_107016  |
| At5g65850 | SALK_091257  |
| At5g65900 | SALK_140168  |
| At5g66410 | SAIL_625_D11 |
| At5g66770 | SALK_132051  |
| At5g67130 | SAIL_760_G05 |
| At5g67580 | SALK_057545  |
| At1g61790 | SALK_064315  |

## Supplementary Table 7

Supplementary Table 7. Classification of MPSS differentially expressed genes between wild-type and *sp/* ovules.

| Class name               | Number of genes (%) <sup>a</sup> | Description <sup>b</sup>                                                                                                          |
|--------------------------|----------------------------------|-----------------------------------------------------------------------------------------------------------------------------------|
| Signalling               | 97 (7.5%) <sup>a</sup>           | Kinase and leucine-rich repeat domain proteins; calmodulins, armadillo proteins; hormone-related and stress-induced.              |
| Cell cycle               | 11(0.85%) <sup>a</sup>           | Proteins involved in the mitotic cell cycle.                                                                                      |
| Organelle processes      | 56 (4.3%) <sup>a</sup>           | Proteins involved in organellar activity, mainly chloroplast and mitochondria.                                                    |
| RNA binding              | 76 (5.8%) <sup>a</sup>           | RNA binding domain proteins; RNA helicases, Pumilio proteins, RNA methyltransferases; ribosomal proteins and RNA capping enzymes. |
| DNA binding              | 50 (3.8%) <sup>a</sup>           | Proteins containing DNA binding domains that are not transcription factors.                                                       |
| Transcription factors    | 72 (5.6%) <sup>a</sup>           | Transcription Factors.                                                                                                            |
| Nucleic acid-interacting | 14 (1%) <sup>a</sup>             | Exonucleases, DNA methyltransferases and endonucleases.                                                                           |
| Chromatin related        | 16 (1.2%) <sup>a</sup>           | Histone and histone interacting proteins.                                                                                         |
| Housekeeping processes   | 210 (16.15%) <sup>a</sup>        | Proteins involved in cellular trafficking, ubiquitination, photosynthesis, pathogen response, multimerization, chaperones.        |
| Metabolism               | 237 (18.2%) <sup>a</sup>         | Metabolic proteins; epimerases, transferases, hydrolases, lipases, AMP binding proteins, etc.                                     |
| Others                   | 222 (17%) <sup>a</sup>           | Include all the genes that could not be classified in other category.                                                             |
| Non Pfam domains         | 240 (18.5%) <sup>a</sup>         | Include all genes that contained non Pfam domain and couldn't be classified.                                                      |
| Total genes              | 1301                             |                                                                                                                                   |

<sup>a</sup>Represents percentage of genes on every Pfam class.

<sup>b</sup>Description is based on Pfam domains containing.

## Supplementary Table 8

Supplementary Table 8. PPR genes downregulated in the *sporocyteless* ovule.

| Gene ID   | Transcriptional activity (TPM) |                  | Predicted function                   |       |         |
|-----------|--------------------------------|------------------|--------------------------------------|-------|---------|
|           | Wild type ovule                | <i>sp/</i> ovule |                                      |       |         |
| At1g02060 | 18                             | 0                | Pentatricopeptide containing protein | (PPR) | repeat- |
| At1g11900 | 9                              | 0                | Pentatricopeptide containing protein | (PPR) | repeat- |
| At1g12300 | 16                             | 0                | Pentatricopeptide containing protein | (PPR) | repeat- |
| At1g12775 | 13                             | 0                | Pentatricopeptide containing protein | (PPR) | repeat- |
| At1g63130 | 24                             | 0                | Pentatricopeptide containing protein | (PPR) | repeat- |
| At2g17210 | 15                             | 0                | Pentatricopeptide containing protein | (PPR) | repeat- |
| At2g35030 | 10                             | 0                | Pentatricopeptide containing protein | (PPR) | repeat- |
| At3g56030 | 9                              | 0                | Pentatricopeptide containing protein | (PPR) | repeat- |
| At4g19191 | 31                             | 0                | Pentatricopeptide containing protein | (PPR) | repeat- |
| At4g19220 | 18                             | 0                | Pentatricopeptide containing protein | (PPR) | repeat- |
| At4g21170 | 15                             | 0                | Pentatricopeptide containing protein | (PPR) | repeat- |
| At4g21880 | 9                              | 0                | Pentatricopeptide containing protein | (PPR) | repeat- |
| At4g28010 | 14                             | 0                | Pentatricopeptide containing protein | (PPR) | repeat- |
| At4g38150 | 28                             | 0                | Pentatricopeptide containing protein | (PPR) | repeat- |
| At5g13770 | 22                             | 0                | Pentatricopeptide                    | (PPR) | repeat- |

Supplementary Table 8

|           |    |   |                                         |       |         |
|-----------|----|---|-----------------------------------------|-------|---------|
|           |    |   | containing protein                      |       |         |
| At5g61800 | 14 | 0 | Pentatricopeptide<br>containing protein | (PPR) | repeat- |
| At5g61990 | 14 | 0 | Pentatricopeptide<br>containing protein | (PPR) | repeat- |
| At5g66500 | 13 | 0 | Pentatricopeptide<br>containing protein | (PPR) | repeat- |

---



## Supplementary Table 9

Supplementary Table 9. Primers used in RT-PCR experiments.

| GENE ID <sup>a</sup> | Forward primer              | Reverse primer              |
|----------------------|-----------------------------|-----------------------------|
| At3g22760            | 5'-ATGCTTTGCTGCTGGATTTT-3'  | 5'-TTACAGCCTCGTTTGTGTTCG-3' |
| At5g55210            | 5'-AGTGGCCGTGTAAGGAAATG-3'  | 5'-CTCTGTCTCACCGGAACCAT-3'  |
| At5g16720            | 5'-GATCAAATTCAGGGCGTGT-3'   | 5'-CGGATCAAGCTCCTTAGTCG-3'  |
| At4g23960            | 5'-GCAATTGTTTCCGGAGGTTA-3'  | 5'-CGGAGTTCCACCATTTGTTT-3'  |
| At5g 01860           | 5'-AGAGTTCCGCTTCCTGTTCA-3'  | 5'-CTGCTGAAGGAAAGTCCAC'-3   |
| At3g07820            | 5'-CAATGCAGCTTGGAGAGTCA -3' | 5'-CCAACACGTTGATGTGGAA-3'   |
| At4g38380            | 5'-GGTGCTCCTGCTTATGTGGT-3'  | 5'-GCATCAAAATGGCAACAGTG-3'  |
| At3g16130            | 5'-CGATGAAATGCTCCTCGATT-3'  | 5'-AGCACTTGGCACACACACTC-3'  |
| At4g31600            | 5'-TGTGCTGGTGGAGAAGTCTG-3'  | 5'-AGGACAATGCCATAACCAG-3'   |
| At3g55060            | 5'-TGCGAAAAGAAGCGGATAG-3'   | 5'-GCATCGAGATGAATGATTGC-3   |
| At4g38520            | 5'-ACCGTTCAGCAAGCCATTAC-3'  | 5'-CGCGGATGATTCTGGACTAT-3'  |
| At1g28330            | 5'-CGTAAGATCACCACCCAACC-3'  | 5'-GACGCTCCTCCACACGTTAT-3'  |
| ACTIN 2              | 5'-TCCCTCAGCACATTCCAGCAG-3' | 5'-AACGATTCTGGACCTGCCTC-3'  |

<sup>a</sup> Arabidopsis Genome Initiative Number

Supplementary Table 10

Supplementary Table 10. Primers and restriction sites used for promoter ::fusion plasmid construction.

| GENE ID   | FORWARD PRIMERS                               | Restriction site | REVERSE PRIMERS                            | Restriction site |
|-----------|-----------------------------------------------|------------------|--------------------------------------------|------------------|
| At3g01740 | 5'-<br>GCGTCGACTCGACTACGAGTATTCAC<br>AACGA-3' | Sall             | 5'-<br>GCGGATCCTTTTTGGCCTTGATGGA<br>GTT-3' | BamHI            |
| At3g53420 | 5'-<br>GCAAGCTTACCTTTTGCCAACACAGA<br>CC-3'    | HindIII          | 5'-<br>GCGGATCCAGCTCCGCTCCATCAAT<br>AAA-3' | BamHI            |
| At3g62310 | 5'-<br>GCAAGCTTTATGCCCGTATGGGATTG<br>TT-3'    | HindIII          | 5'-<br>GCGGATCCTCTACGAGGCTGTGTGC<br>ATC-3' | BamHI            |
| At2g40880 | 5'-<br>GCAAGCTTTCTCCACCGGAAAAACAA<br>AC-3'    | HindIII          | 5'-<br>GCTCTAGATACCTGCTCCCTTGCTTT<br>G-3'  | XbaI             |
| At1g31760 | 5'-<br>GCAAGCTTCTGACCATGGCTCTCCT<br>TA-3'     | HindIII          | 5'-<br>GCTCTAGACCACGAGTGAGTTCCT<br>TTC-3'  | XbaI             |
| At4g38150 | 5'-<br>GCGTCGACACGCCACTACAACACACC<br>AA-3'    | Sall             | 5'-<br>GCGGATCCAGGAAGCCATCGTCAGA<br>CAG-3' | BamHI            |
| At4g38380 | 5'-<br>GCGTCGACGCAGAGGAGAAGTTGGTT<br>GC-3'    | Sall             | 5'-<br>GCGGATCCGCAATGGCTGGAAGAG<br>AGAG-3' | BamHI            |
| At5g13490 | 5'-<br>GCGTCGACGCCTTCCCAACCATTACT<br>GA-3'    | Sall             | 5'-<br>GCGGATCCCCTCTCCACAACGAACC<br>AAT-3' | BamHI            |
| At5g22460 | 5'-<br>GCAAGCTTTTTGGAGTCTCTCGGCAC<br>TT-3'    | HindIII          | 5'-<br>GCGGATCCATCGGCGAGTTCTTGAA<br>TGT-3' | BamHI            |

## Supplementary Figures.

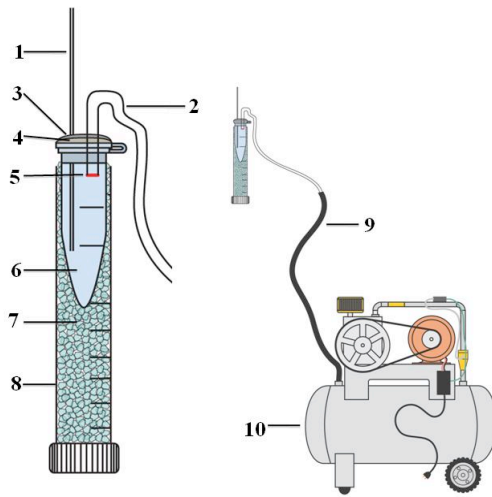

Supplementary Figure 1. Micro-aspirator device for ovules of Arabidopsis.

The micro-aspirator device consists of an aspiration/collection tube and a vacuum pump. The aspiration/collection tube is made of a 1.5 mL microcentrifuge tube that serves as the collection chamber. The lid of the microcentrifuge tube has a 2 mm perforation and a 5 mm perforation. A 5 cm (10  $\mu$ l capacity) glass capillary tube is inserted in the 2 mm perforation and a standard plastic intravenous line (IVL) hose is inserted in the 5 mm perforation. The glass capillary tube inside the microcentrifuge tube should reach the 100  $\mu$ l mark while the IVL hose should be approximately 1 cm from the lid. Perforations on the lid are sealed with adhesive epoxy resin. Once resin has polymerized, the microcentrifuge tube must be completely sealed by adding a layer of transparent silicone sealant on top of the resin layer and by covering the lid with parafilm. In contrast to most epoxy resins that tend to crack at low temperatures, silicone sealant resist low temperatures necessary for sample preservation. The aspiration/collection tube is subsequently placed inside a 15 mL conical falcon tube (with cap). The conical base of the tube is sliced to allow the aspiration/collection tube to fit (only the lid of the aspiration/collection tube should be surfacing out of the falcon tube). The falcon tube is filled with ground-to-powder dry ice and the cap is secured. Before securing the cap, it is important to perforate the cap to allow release of CO<sub>2</sub>. This arrangement allows the falcon tube and the aspiration/collection tube to work as a single unit and to be held as a pen. The other end of the IV hose is connected to vacuum pump capable of ensuring a steady pressure of 0.3 to 0.6 Kg.cm<sup>-2</sup> necessary to detach an ovule from the placental tissue by transversally sectioning its funiculus. After an ovule collecting session, the lid of the tube can be carefully removed by cutting the tube hinge. The lid with the capillary tube and the IVL hose can be saved and reused for subsequent sessions. Ovules are flash frozen in liquid nitrogen and preserved at -80°C. Detail: 1.- Glass capillary tube; 2.- Plastic IVL hose; 3.- Silicone sealant; 4.- Epoxy resin; 5.- Nylon mesh filter; 6.- Microcentrifuge tube; 7.- Ground dry ice; 8.- 15 mL falcon tube; 9.- Pump hose; 10.- Vacuum pump.

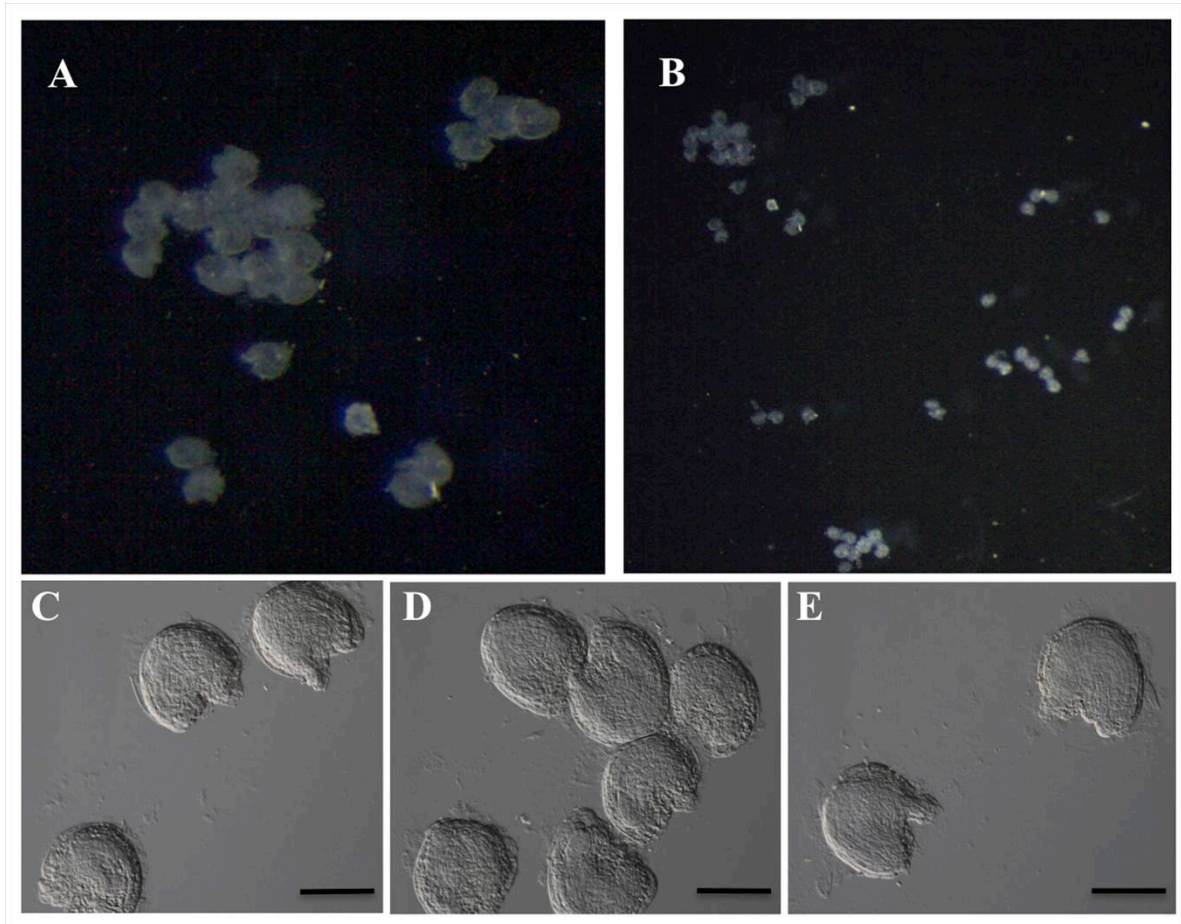

Supplementary Figure 2. Integrity of micro-aspirated wild type ovules.

Ovules were aspirated using the device shown in Suppl Fig. 1 and observed under stereo-microscope (A and B) or Nomarsky optics in 50% Glycerol (C to E). Scale bar: 1cm=74.5  $\mu$ m.

| Gene                              | wt | <i>spl/spl</i> |                                                                    |
|-----------------------------------|----|----------------|--------------------------------------------------------------------|
| At5g01860 (25-0 TPM)              |    |                | Zinc finger (C2H2 type).                                           |
| At3g07820 (9-0 TPM)               |    |                | Polygalacturonase 3 (PGA3).                                        |
| At4g23960 (19-0 TPM)              |    |                | F-box family protein similar to SKP1.                              |
| At4g38380 (10-0 TPM) <sup>P</sup> |    |                | MATE-efflux related.                                               |
| At3g16730 (31-0 TPM) <sup>P</sup> |    |                | Expressed protein.                                                 |
| At3g22760 (33-0 TPM)              |    |                | CXC domain containing TSO1-like protein 1 (SOL1).                  |
| At4g31600 (21-0 TPM) <sup>P</sup> |    |                | UDP-glucuronic acid/UDP-N-acetylglactosamine transporter-related.. |
| At3g55060 (34-0 TPM) <sup>P</sup> |    |                | Expressed protein.                                                 |
| At4g38520 (58-0 TPM) <sup>P</sup> |    |                | Protein phosphatase 2C family protein.                             |
| At5g55210 (50-0 TPM) <sup>P</sup> |    |                | Expressed protein.                                                 |
| At5g16720 (29-0 TPM) <sup>P</sup> |    |                | Expressed protein.                                                 |
| At1g28330 (798-29 TPM)            |    |                | Dormancy-associated protein .                                      |
| Actin 2                           |    |                |                                                                    |

Supplementary Figure 3. RT-PCR of differentially expressed genes in wild-type and *sporocyteless* ovules.
